# Supplementary material for: Small angle X-ray studies of short-range order in non-stoichiometric pseudoprotic ionic liquids: the influence of chemical structure
Source: Royal Society of Chemistry journal article supplement (doi:10.1039/d3cp01853a), 2023-01-01

## Small Angle X-ray Studies of Short-Range Order in Non-Stoichiometric Pseudoprotic Ionic Liquids: The Influence of Chemical Structure

Mark N. Kobrak and Dmytro Nykypanchuk

### Contents

|                                                                                                               |    |
|---------------------------------------------------------------------------------------------------------------|----|
| S.1: Fitting Procedure for SAXS Data.....                                                                     | 5  |
| Table S.1: Notation used in the present study.....                                                            | 5  |
| S.2 Fitting Information for Mixtures Presented in Figure 1 .....                                              | 6  |
| Table S.2: Local Structure Peaks for T2A C6A .....                                                            | 6  |
| Table S.3: Fitting Parameters for T2A C6A .....                                                               | 6  |
| Figure S.1: Fitting functions (blue) and raw data (red, 1/5 <sup>th</sup> of points shown) for T2A C6A .....  | 7  |
| Figure S.2: Fitting functions and residuals for T2A C6A .....                                                 | 8  |
| Table S.4: Local Structure Peaks for T2A C8A .....                                                            | 11 |
| Table S.5: Fitting Parameters for T2A C8A .....                                                               | 11 |
| Figure S.3: Fitting functions (blue) and raw data (red, 1/5 <sup>th</sup> of points shown) for T2A C8A .....  | 12 |
| Figure S.4: Fitting functions and residuals for T2A C8A .....                                                 | 13 |
| Table S.6: Local Structure Peaks for T2A C10A .....                                                           | 15 |
| Table S.7: Fitting Parameters for T2A C10A .....                                                              | 15 |
| Figure S.5: Fitting functions (blue) and raw data (red, 1/5 <sup>th</sup> of points shown) for T2A C10A ..... | 16 |
| Figure S.6: Fitting functions and residuals for T2A C10A .....                                                | 17 |
| Table S.8: Local Structure Peaks for T6A C2A .....                                                            | 19 |
| Table S.9: Fitting Parameters for T6A C2A .....                                                               | 19 |
| Figure S.7: Fitting functions (blue) and raw data (red, 1/5 <sup>th</sup> of points shown) for T6A C2A .....  | 20 |
| Figure S.8: Fitting functions and residuals for T6A C2A .....                                                 | 21 |
| Table S.10: Local Structure Peaks for T6A C6A .....                                                           | 24 |
| Table S.11: Fitting Parameters for T6A C6A .....                                                              | 24 |
| Figure S.9: Fitting functions (blue) and raw data (red, 1/5 <sup>th</sup> of points shown) for T6A C6A .....  | 25 |

|                                                                                                                |    |
|----------------------------------------------------------------------------------------------------------------|----|
| Figure S.10: Fitting functions and residuals for T6A C6A .....                                                 | 26 |
| Table S.12: Local Structure Peaks for T6A C8A .....                                                            | 30 |
| Table S.13: Fitting Parameters for T6A C8A .....                                                               | 30 |
| Figure S.11: Fitting functions (blue) and raw data (red, 1/5 <sup>th</sup> of points shown) for T6A C8A .....  | 31 |
| Figure S.12: Fitting functions and residuals for T6A C8A .....                                                 | 32 |
| Table S.14: Local Structure Peaks for T6A C10A .....                                                           | 35 |
| Table S.15: Fitting Parameters for T6A C10A .....                                                              | 35 |
| Figure S.13: Fitting functions (blue) and raw data (red, 1/5 <sup>th</sup> of points shown) for T6A C10A ..... | 36 |
| Figure S.14: Fitting functions and residuals for T6A C10A .....                                                | 37 |
| Table S.16: Local Structure Peaks for T8A C2A .....                                                            | 40 |
| Table S.17: Fitting Parameters for T8A C2A .....                                                               | 40 |
| Figure S.15: Fitting functions (blue) and raw data (red, 1/5 <sup>th</sup> of points shown) for T8A C2A .....  | 41 |
| Figure S.16: Fitting functions and residuals for T8A C2A .....                                                 | 42 |
| Table S.18: Local Structure Peaks for T8A C6A .....                                                            | 45 |
| Table S.19: Fitting Parameters for T8A C6A .....                                                               | 45 |
| Figure S.17: Fitting functions (blue) and raw data (red, 1/5 <sup>th</sup> of points shown) for T8A C6A .....  | 46 |
| Figure S.18: Fitting functions and residuals for T8A C6A .....                                                 | 47 |
| Table S.20: Local Structure Peaks for T8A C8A .....                                                            | 51 |
| Table S.21: Fitting Parameters for T8A C8A .....                                                               | 51 |
| Figure S.19: Fitting functions (blue) and raw data (red, 1/5 <sup>th</sup> of points shown) for T8A C8A .....  | 52 |
| Figure S.20: Fitting functions and residuals for T8A C8A .....                                                 | 53 |
| Table S.22: Local Structure Peaks for T8A C10A .....                                                           | 57 |
| Table S.23: Fitting Parameters for T8A C10A .....                                                              | 57 |
| Figure S.21: Fitting functions (blue) and raw data (red, 1/5 <sup>th</sup> of points shown) for T8A C10A ..... | 58 |
| Figure S.22: Fitting functions and residuals for T8A C10A .....                                                | 59 |
| S.3: Fitting Information for Mixtures Presented in Figure 5 .....                                              | 62 |
| Table S.24: Local Structure Peaks for D2A C6A .....                                                            | 62 |
| Table S.25: Fitting Parameters for D2A C6A .....                                                               | 62 |

|                                                                                                               |    |
|---------------------------------------------------------------------------------------------------------------|----|
| Figure S.23: Fitting functions (blue) and raw data (red, 1/5 <sup>th</sup> of points shown) for D2A C6A.....  | 63 |
| Figure S.24: Fitting functions and residuals for D2A C6A .....                                                | 64 |
| Table S.26: Local Structure Peaks for D2A C8A.....                                                            | 67 |
| Table S.27: Fitting Parameters for D2A C8A .....                                                              | 67 |
| Figure S.25: Fitting functions (blue) and raw data (red, 1/5 <sup>th</sup> of points shown) for D2A C8A.....  | 68 |
| Figure S.26: Fitting functions and residuals for D2A C8A .....                                                | 69 |
| S.4: Fitting Information for Mixtures Presented in Figure 6 .....                                             | 73 |
| Table S.28: Local Structure Peaks for M18A C8A.....                                                           | 73 |
| Table S.29: Fitting Parameters for M18A C8A .....                                                             | 73 |
| Figure S.27: Fitting functions (blue) and raw data (red, 1/5 <sup>th</sup> of points shown) for M18A C8A..... | 74 |
| Figure S.28: Fitting functions and residuals for M18A C8A.....                                                | 75 |
| S.5: Fitting Information for Mixtures Presented in Figure 7 .....                                             | 77 |
| Table S.30: Local Structure Peaks for T6a HCyc .....                                                          | 77 |
| Table S.31: Fitting Parameters for T6a HCyc.....                                                              | 77 |
| Figure S.29: Fitting functions (blue) and raw data (red, 1/5 <sup>th</sup> of points shown) for T6A HCyc..... | 78 |
| Figure S.30: Fitting functions and residuals for T6A HCyc .....                                               | 79 |
| Table S.32: Local Structure Peaks for T6A HBz.....                                                            | 81 |
| Table S.33: Fitting Parameters for T2A C6A.....                                                               | 81 |
| Figure S.31: Fitting functions (blue) and raw data (red, 1/5 <sup>th</sup> of points shown) for T6A HBz.....  | 82 |
| Figure S.32: Fitting functions and residuals for T6A HBz .....                                                | 83 |
| Table S.34: Local Structure Peaks for T6A HSa.....                                                            | 85 |
| Table S.35: Fitting Parameters for T6A HSa .....                                                              | 85 |
| Figure S.33: Fitting functions (blue) and raw data (red, 1/5 <sup>th</sup> of points shown) for T6A HSa.....  | 86 |
| Figure S.34: Fitting functions and residuals for T6A HSa .....                                                | 87 |
| S.6: Fitting Information for Mixtures Presented in Figure 8 .....                                             | 89 |
| Table S.36: Local Structure Peaks for T2OH C8A .....                                                          | 89 |
| Table S.37: Fitting Parameters for T2A C6A.....                                                               | 89 |
| Figure S.35: Fitting functions (blue) and raw data (red, 1/5 <sup>th</sup> of points shown) for T2OH C8A..... | 90 |

|                                                                                                                               |    |
|-------------------------------------------------------------------------------------------------------------------------------|----|
| Figure S.36: Fitting functions and residuals for T2OH C8A .....                                                               | 91 |
| S.7: Figures for Low-Q SAXS Analysis .....                                                                                    | 94 |
| Figure S.37: Log-log plots of low-q scattering for compositions showing evidence of structure in this regime .....            | 94 |
| Figure S.38: Low-q scattering for T6A HCyc $\chi=0.5$ ; structure insufficient to allow fitting to estimate lengthscale ..... | 95 |

## S.1: Fitting Procedure for SAXS Data

Here, we report the fitting procedure used to determine peak values presented in the report.

For each dataset, the SAXS signal  $S(q)$  was fitted to a function consisting of a linear baseline and a sum of five Lorentzian functions:

$$S(q) = a + bq + \sum_{i=1}^5 \frac{A_i}{(q - q_{0i})^2 + w_i^2} \quad (\text{S1})$$

The wavenumber  $q$  was expressed in units of  $\text{\AA}^{-1}$ . For each dataset, the function was fit using Mathematica 13.0 to implement the above function.

As noted in the text, with few exceptions the local structure peak was well-described either as a single, isolated peak or, where noted, as a pair of peaks consisting of one prominent peak and a low, broad peak at a slightly higher  $q$  value. The use of a larger number of Lorentzian functions was driven by the relatively complex structures at high ( $q > 1.0 \text{\AA}^{-1}$ ) wavenumber, and in some cases the presence of a shoulder at low ( $q < 0.2 \text{\AA}^{-1}$ )  $q$  values.

For each mixture, we report:

- A table showing the peak center and width for the local structure
- A complete table of all fitted parameters
- A figure showing the experimental data and fitted function on the same plot (only 1/5<sup>th</sup> of datapoints are shown)
- A series of plots showing the fitted functions and their residuals

For convenience, we reproduce here Table 1 from the report so that mixtures can be clearly identified.

Table S.1: Notation used in the present study

| Amines                                      |                            | Acids |                |
|---------------------------------------------|----------------------------|-------|----------------|
| T2A                                         | Triethylamine              | C2A   | Acetic acid    |
| T6A                                         | Trihexylamine              | C6A   | Hexanoic acid  |
| T8A                                         | Trioctylamine              | C8A   | Octanoic acid  |
| M18A                                        | Octadecylamine             | C10A  | Decanoic acid  |
| D2A                                         | Diethylamine               | HBz   | Benzoic acid   |
| T2OH                                        | Triethanolamine            | HSa   | Salicylic acid |
| HCyc                                        | Cyclohexanecarboxylic acid |       |                |
| $\chi$ Mole fraction of acid in the mixture |                            |       |                |

## S.2 Fitting Information for Mixtures Presented in Figure 1

### T2A C6A

Table S.2: Local Structure Peaks for T2A C6A

| T2AC6A  |                         |                         |
|---------|-------------------------|-------------------------|
|         | q ( $\text{\AA}^{-1}$ ) | w ( $\text{\AA}^{-1}$ ) |
| chi=0   | 0                       | 0                       |
| chi=33  | 0                       | 0                       |
| chi=50  | 0.348931                | 0.228823                |
| chi=67  | 0.420729                | 0.153419                |
| chi=75  | 0.419965                | 0.128399                |
| chi=83  | 0.418243                | 0.142661                |
| chi=100 | 0.473993                | 0.192415                |

Table S.3: Fitting Parameters for T2A C6A

| a     | b        | q <sub>01</sub> | w <sub>1</sub> | A <sub>1</sub> | q <sub>02</sub> | w <sub>2</sub> | A <sub>2</sub> | q <sub>03</sub> | w <sub>3</sub> | A <sub>3</sub>        | q <sub>04</sub> | w <sub>4</sub> | A <sub>4</sub> | q <sub>05</sub> | w <sub>5</sub> | A <sub>5</sub> |
|-------|----------|-----------------|----------------|----------------|-----------------|----------------|----------------|-----------------|----------------|-----------------------|-----------------|----------------|----------------|-----------------|----------------|----------------|
| 0.988 | 0.00827  | 0.057<br>3      | 0.366          | 0.0146         | 1.12            | 0.203          | 0.0247         | 1.27            | 0.265          | 0.0153                | 1.62            | 0.398          | 0.0441         | 2.37            | 0.392          | 0.0107         |
| 2.01  | 0.00964  | 0.161           | 0.36           | 0.0322         | 1.12            | 0.139          | 0.0010<br>9    | 1.19            | 0.257          | 0.0349                | 1.51            | 0.431          | 0.0735         | 2.48            | 0.499          | 0.0212         |
| 3.05  | -0.00996 | 0.349           | 0.229          | 0.0101         | 1.2             | 0.188          | 0.0082         | 1.4             | 0.5            | 0.116                 | 1.44            | 0.379          | 0.0341         | 2.4             | 0.392          | 0.0142         |
| 3.97  | 0.00609  | 0.421           | 0.153          | 0.0067<br>3    | 0.703           | 0.173          | 0.0021<br>9    | 0.885           | 0.391          | 7.29*10 <sup>-7</sup> | 1.41            | 0.403          | 0.143          | 2.35            | 0.5            | 0.0354         |
| 4.98  | 0.01     | 0.42            | 0.128          | 0.0050<br>7    | 0.69            | 0.273          | 0.0088<br>2    | 1.44            | 0.354          | 0.105                 | 1.23            | 0.104          | 0.00032<br>6   | 2.31            | 0.5            | 0.0367         |
| 5.97  | -0.00992 | 0.418           | 0.143          | 0.0066<br>7    | 1.44            | 0.324          | 0.0919         | 2.45            | 0.452          | 0.0343                | 2               | 0.342          | 0.00756        | 0.693           | 0.253          | 0.0077<br>5    |
| 7.01  | -0.0097  | 0.636           | 0.254          | 0.0067<br>4    | 1.43            | 0.258          | 0.0544         | 2.42            | 0.499          | 0.0354                | 1.8             | 0.498          | 0.0148         | 0.474           | 0.192          | 0.0068<br>8    |

Figure S.1: Fitting functions (blue) and raw data (red, 1/5<sup>th</sup> of points shown) for T2A C6A

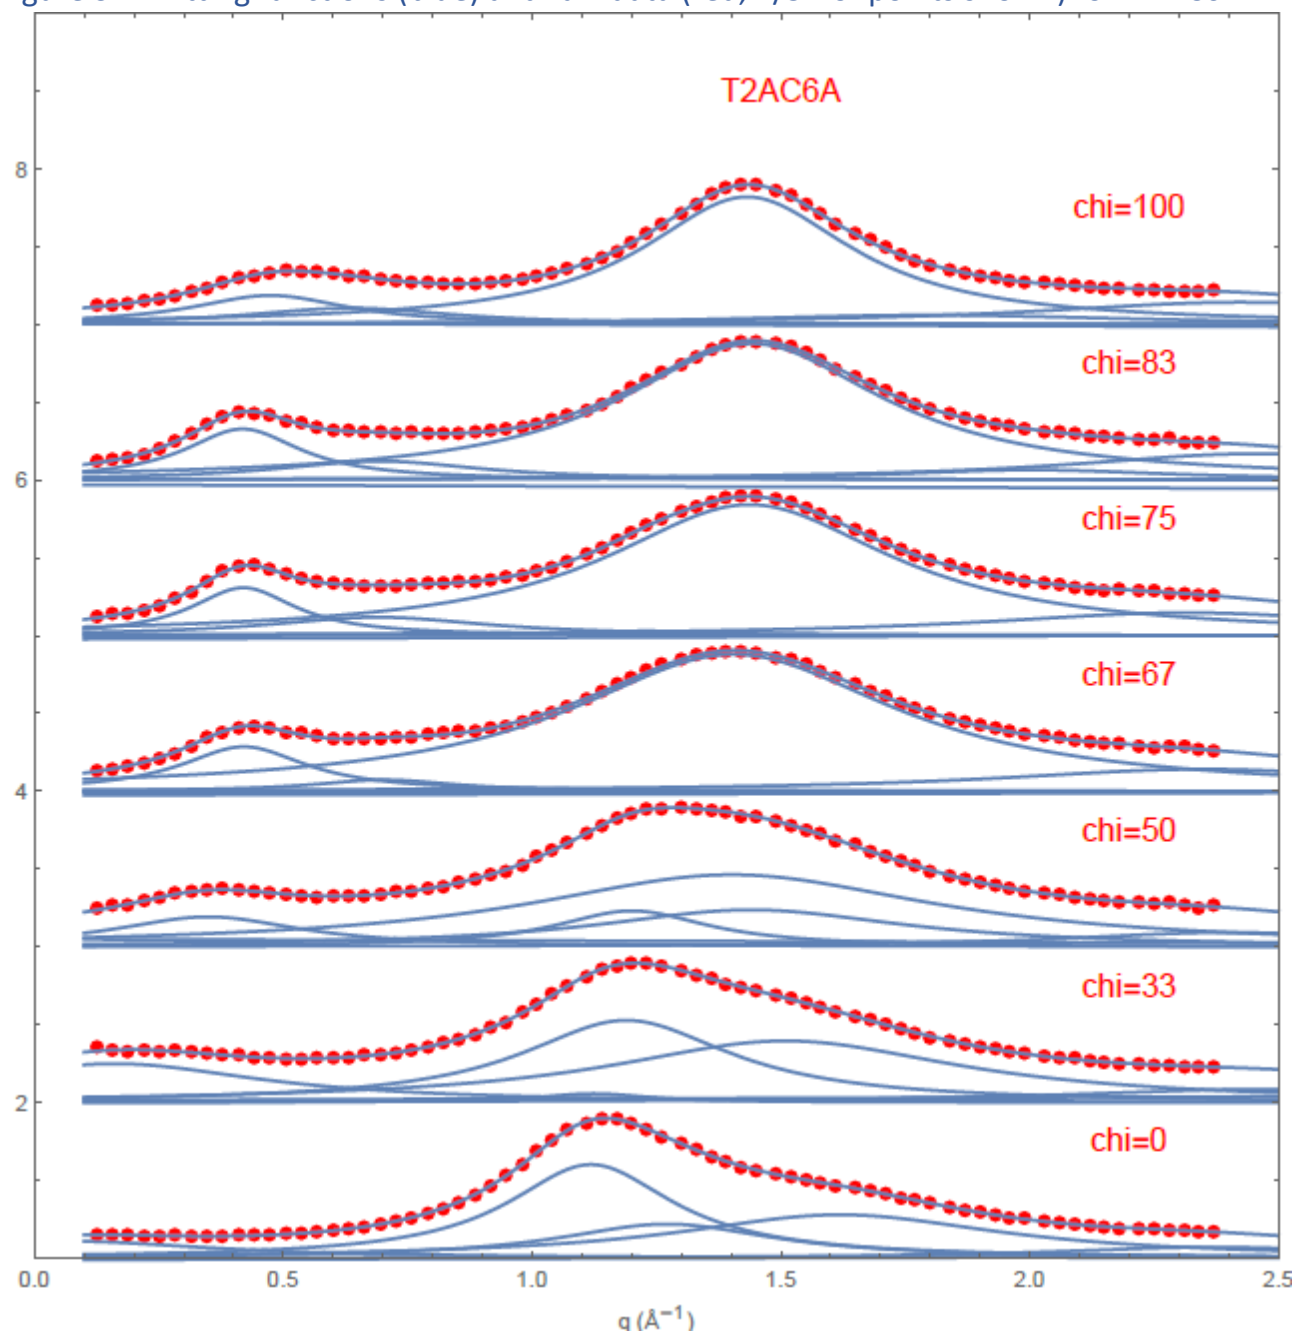

Figure S.2: Fitting functions and residuals for T2A C6A

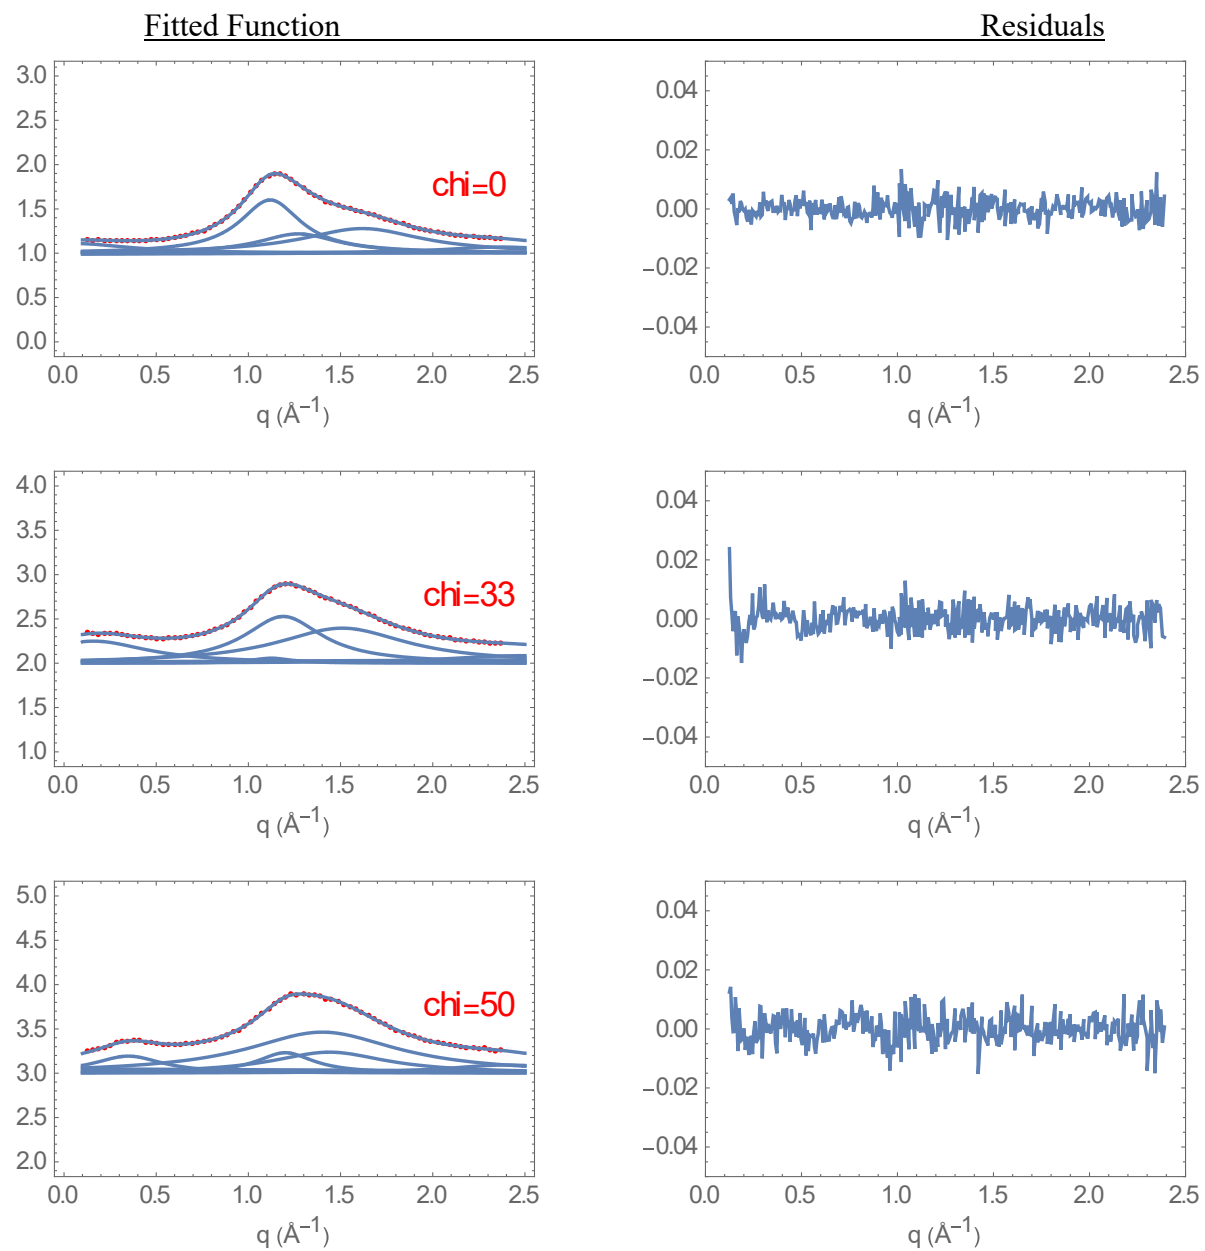



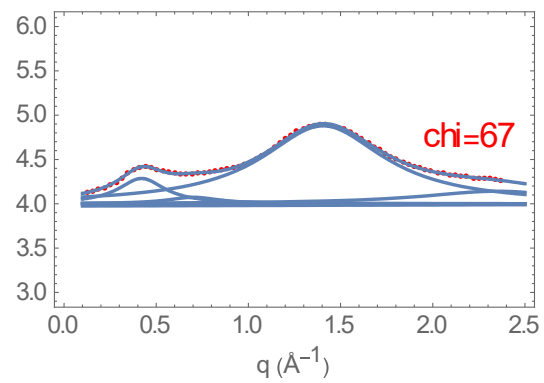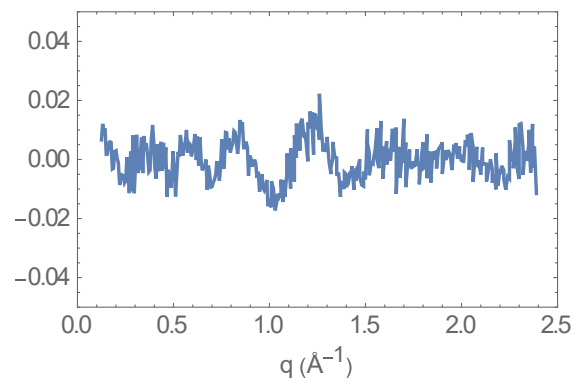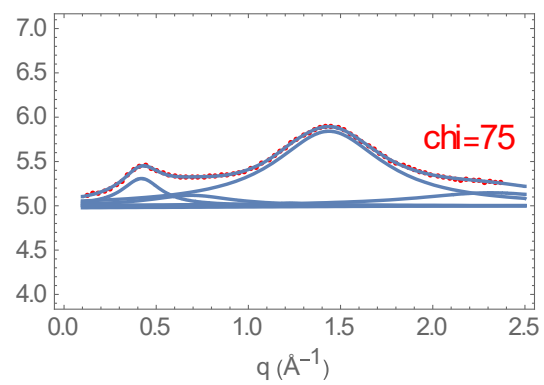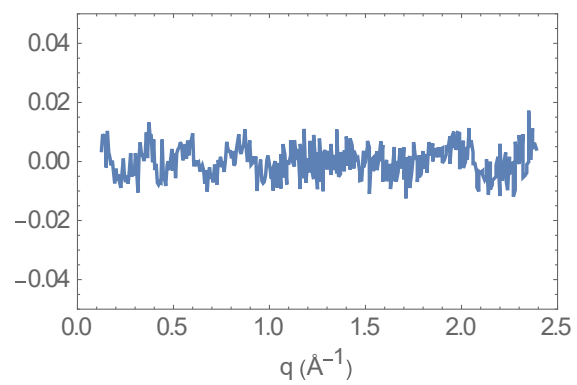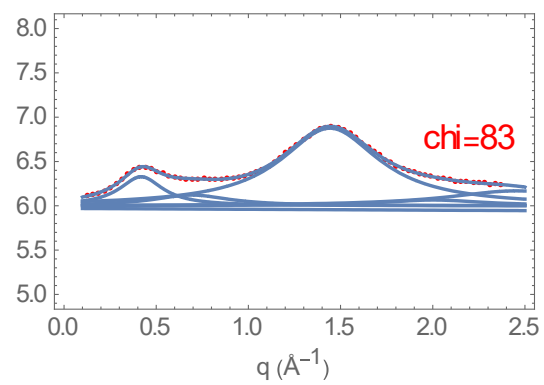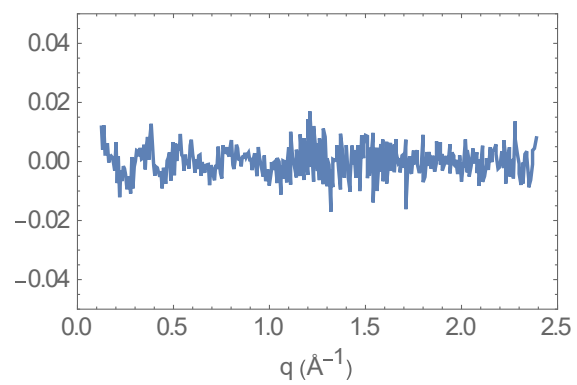

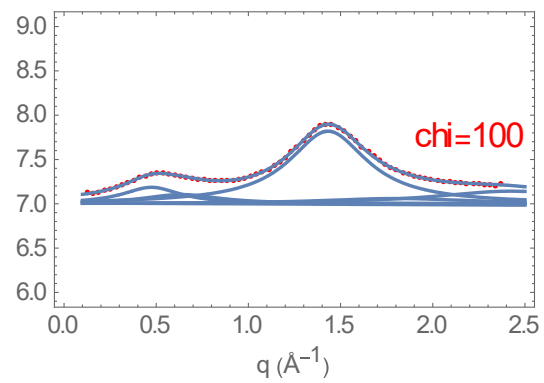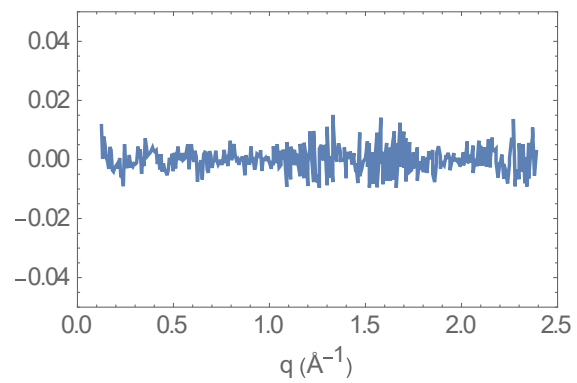

## T2A C8A

Table S.4: Local Structure Peaks for T2A C8A

| T2AC8A  |                      |                      |          |
|---------|----------------------|----------------------|----------|
|         | q (Å <sup>-1</sup> ) | w (Å <sup>-1</sup> ) | D (Å)    |
| chi=0   | 0                    | 0                    |          |
| chi=33  | 0.256844             | 0.232381             | 24.46302 |
| chi=50  | 0.327406             | 0.143057             | 19.19079 |
| chi=67  | 0.354867             | 0.111448             | 17.70573 |
| chi=75  | 0.355721             | 0.097582             | 17.66322 |
| chi=83  | 0.356954             | 0.105052             | 17.60221 |
| chi=100 | 0.41763              | 0.185602             | 15.04485 |

Table S.5: Fitting Parameters for T2A C8A

| a     | b       | q01    | w1     | A1      | q02   | w2    | A2      | q03  | w3    | A3     | q04  | w4    | A4       | q05  | w5  |
|-------|---------|--------|--------|---------|-------|-------|---------|------|-------|--------|------|-------|----------|------|-----|
| 0.988 | 0.00827 | 0.0573 | 0.366  | 0.0146  | 1.12  | 0.203 | 0.0247  | 1.27 | 0.265 | 0.0153 | 1.62 | 0.398 | 0.0441   | 2.37 | 0.3 |
|       | -       |        |        |         |       |       |         |      |       |        |      |       |          |      |     |
| 2.03  | 0.00957 | 0.257  | 0.232  | 0.0137  | 1.1   | 0.218 | 0.0102  | 1.26 | 0.266 | 0.0388 | 1.58 | 0.399 | 0.0536   | 2.05 | 0.1 |
| 3.04  | 0.00999 | 0.327  | 0.143  | 0.0056  | 1.1   | 0.161 | 0.00163 | 1.43 | 0.454 | 0.104  | 1.29 | 0.239 | 0.0215   | 2.08 | 0.  |
| 3.96  | 0.00999 | 0.355  | 0.111  | 0.00435 | 0.61  | 0.396 | 0.0135  | 1.37 | 0.345 | 0.0999 | 1.35 | 0.102 | 0.000446 | 2    | 0   |
| 4.95  | 0.00998 | 0.356  | 0.0976 | 0.00382 | 0.579 | 0.321 | 0.00967 | 1.44 | 0.453 | 0.121  | 1.38 | 0.204 | 0.0153   | 2.07 | 0.1 |
| 5.95  | 0.00998 | 0.357  | 0.105  | 0.00429 | 0.58  | 0.354 | 0.013   | 1.45 | 0.404 | 0.0894 | 1.39 | 0.192 | 0.0147   | 2.31 | 0.3 |
| 6.96  | 0.00948 | 0.418  | 0.186  | 0.0079  | 0.674 | 0.466 | 0.0146  | 2.46 | 0.498 | 0.0303 | 1.41 | 0.218 | 0.0351   | 1.59 | 0.4 |

Figure S.3: Fitting functions (blue) and raw data (red, 1/5th of points shown) for T2A C8A

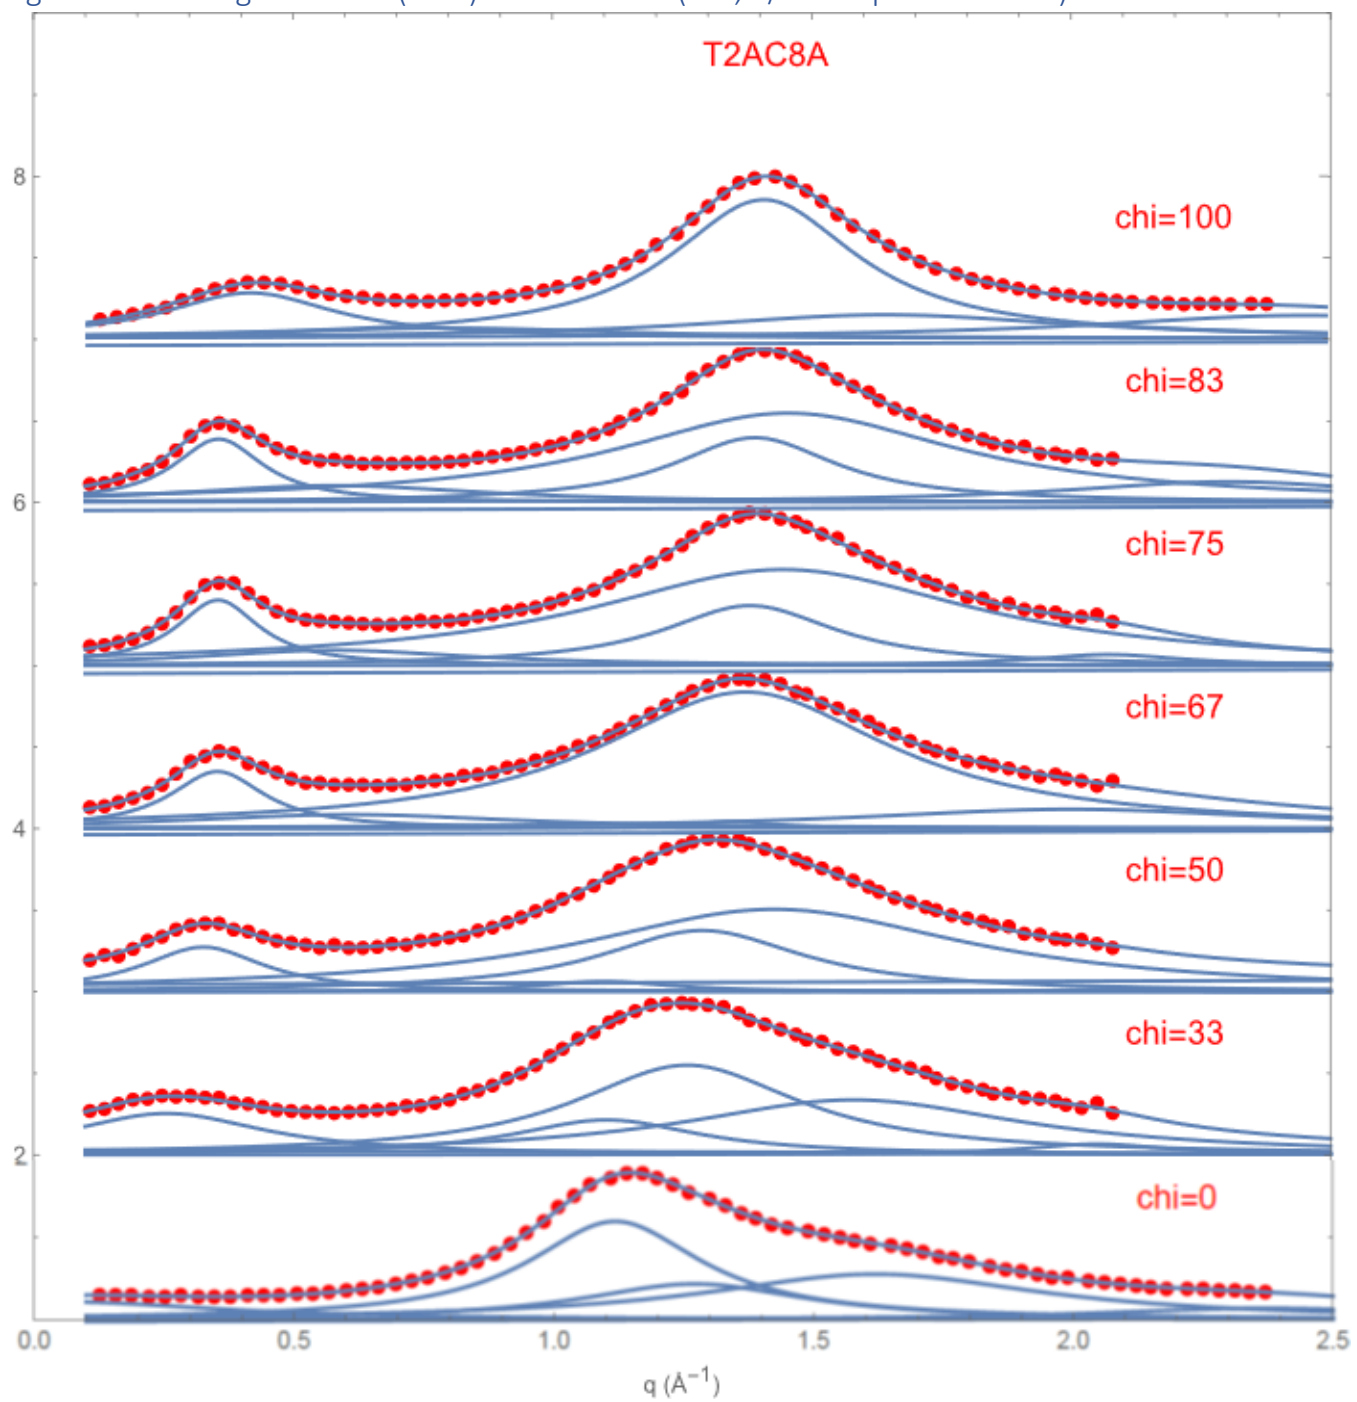

Figure S.4: Fitting functions and residuals for T2A C8A

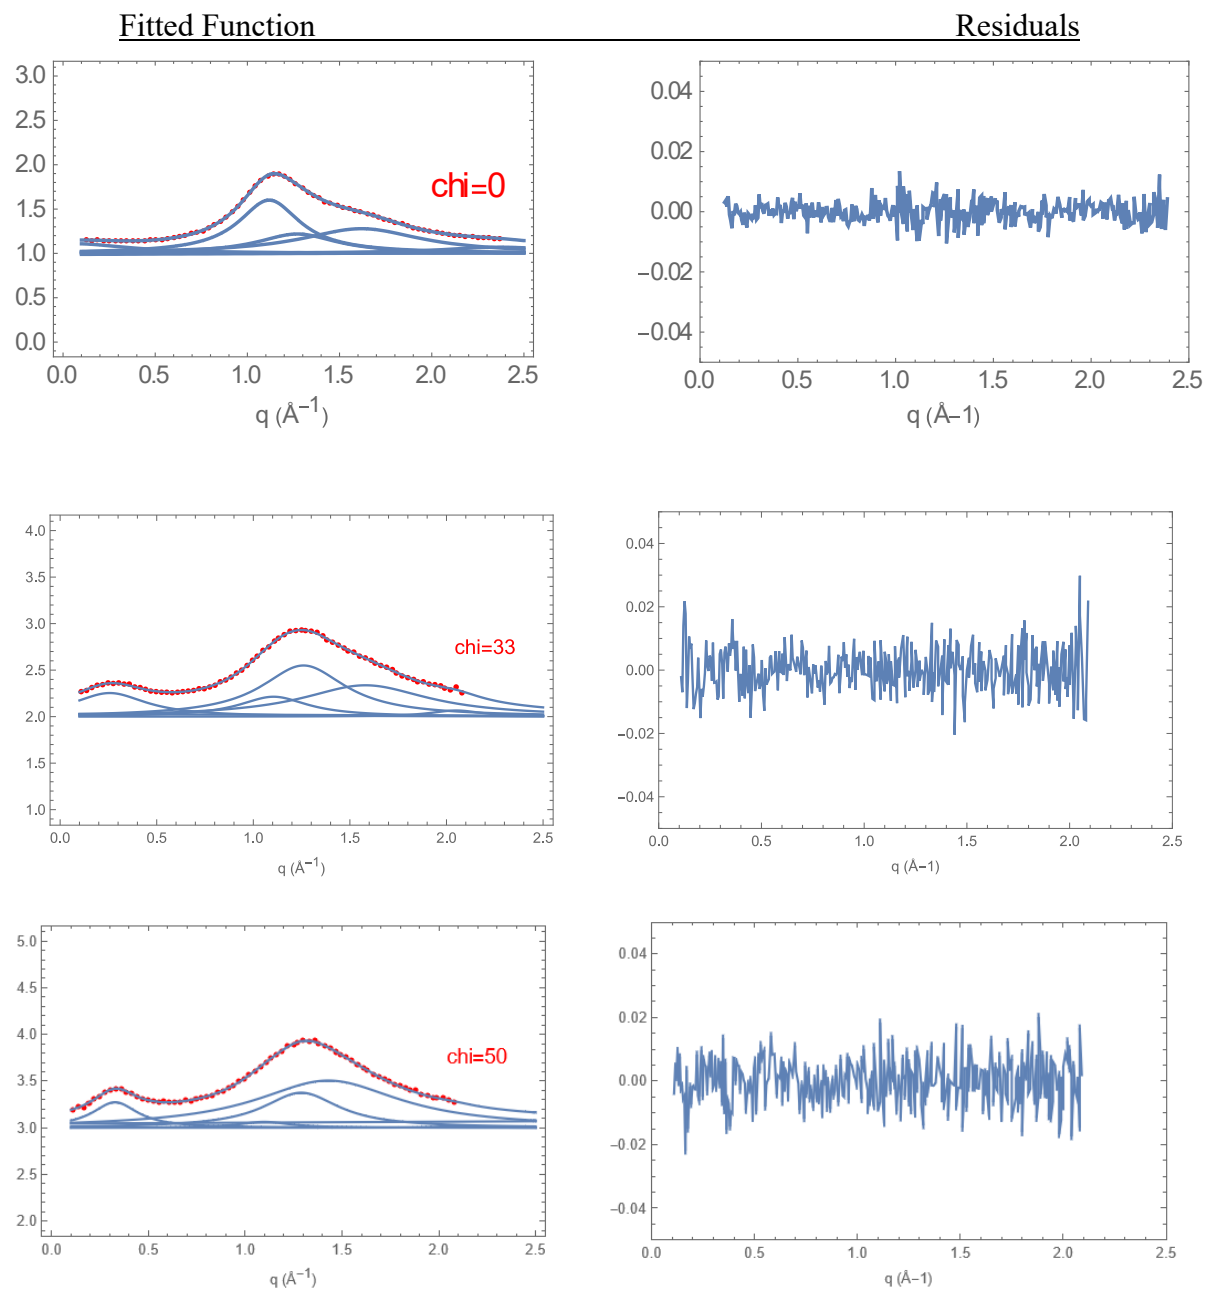

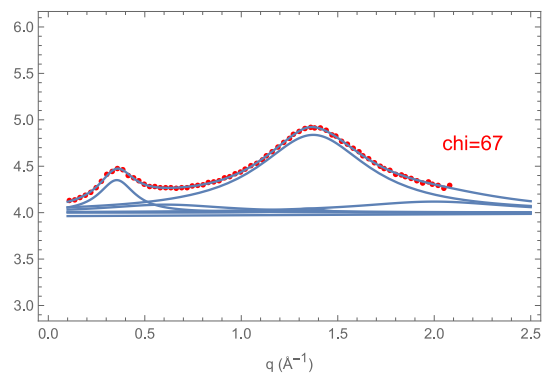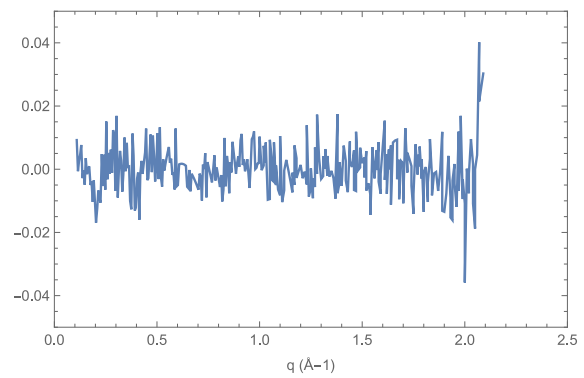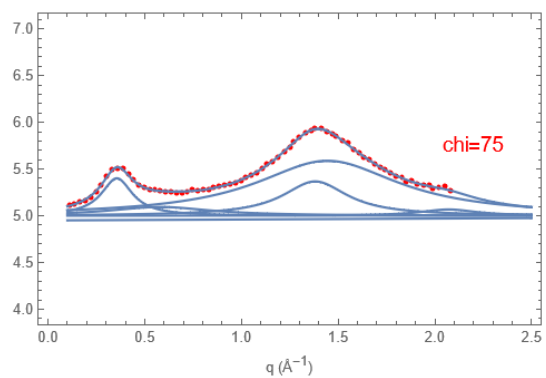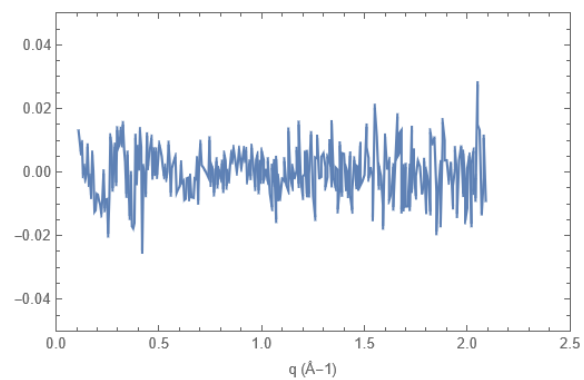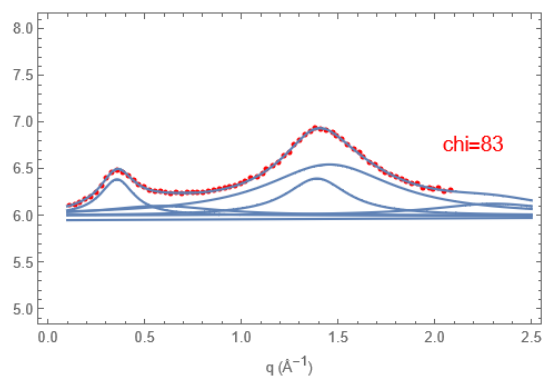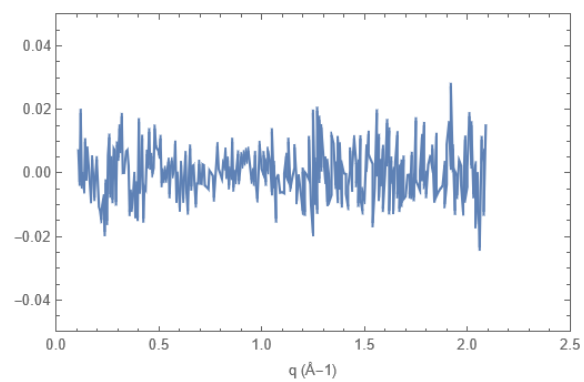

## T2A C10A

Table S.6: Local Structure Peaks for T2A C10A

|        | T2AC10A              |                      |
|--------|----------------------|----------------------|
|        | q (Å <sup>-1</sup> ) | w (Å <sup>-1</sup> ) |
| chi=0  | 0                    | 0                    |
| chi=33 | 0.263093             | 0.156395             |
| chi=50 | 0.298087             | 0.121944             |
| chi=67 | 0.316413             | 0.100748             |
| chi=75 | 0.319659             | 0.090357             |
| chi=83 | 0.316748             | 0.091768             |

Table S.7: Fitting Parameters for T2A C10A

| a         | b       | q <sub>01</sub> | w <sub>1</sub> | A <sub>1</sub> | q <sub>02</sub> | w <sub>2</sub> | A <sub>2</sub> | q <sub>03</sub> | w <sub>3</sub> | A <sub>3</sub> | q <sub>04</sub> | w <sub>4</sub> | A <sub>4</sub> | q <sub>05</sub> | w <sub>5</sub> | A <sub>5</sub> |
|-----------|---------|-----------------|----------------|----------------|-----------------|----------------|----------------|-----------------|----------------|----------------|-----------------|----------------|----------------|-----------------|----------------|----------------|
| 0.98<br>8 | 0.00827 | 0.057<br>3      | 0.366          | 0.0146         | 1.12            | 0.203          | 0.024<br>7     | 1.27            | 0.265          | 0.015<br>3     | 1.62            | 0.398          | 0.0441         | 2.37            | 0.392          | 0.0107         |
| 2.03      | -0.0099 | 0.263           | 0.156          | 0.0067<br>1    | 1.25            | 0.299          | 0.060<br>1     | 1.54            | 0.331          | 0.032<br>8     | 1.96            | 0.4            | 0.0119         | 2.4             | 0.3            | 0.0087         |
| 3.05      | 0.01    | 0.298           | 0.122          | 0.0041<br>9    | 1.29            | 0.3            | 0.053<br>5     | 1.49            | 0.3            | 0.025<br>8     | 1.8             | 0.3            | 0.0047<br>1    | 2.31            | 0.3            | 0.0053<br>8    |
| 3.95      | 0.00999 | 0.316           | 0.101          | 0.0039<br>8    | 1.38            | 0.281          | 0.058<br>2     | 1.6             | 0.497          | 0.038<br>8     | 0.763           | 0.48           | 0.0226         | 2.4             | 0.5            | 0.0314         |
| 4.95      | 0.00999 | 0.32            | 0.090<br>4     | 0.0036<br>5    | 1.4             | 0.272          | 0.060<br>8     | 1.85            | 0.5            | 0.027          | 0.731           | 0.471          | 0.0243         | 2.4             | 0.35           | 0.0128         |
| 5.95      | 0.00998 | 0.317           | 0.091<br>8     | 0.0037<br>2    | 1.4             | 0.234          | 0.039<br>1     | 2.36            | 0.5            | 0.029<br>3     | 1.52            | 0.5            | 0.0453         | 0.645           | 0.438          | 0.0181         |

Figure S.5: Fitting functions (blue) and raw data (red, 1/5<sup>th</sup> of points shown) for T2A C10A

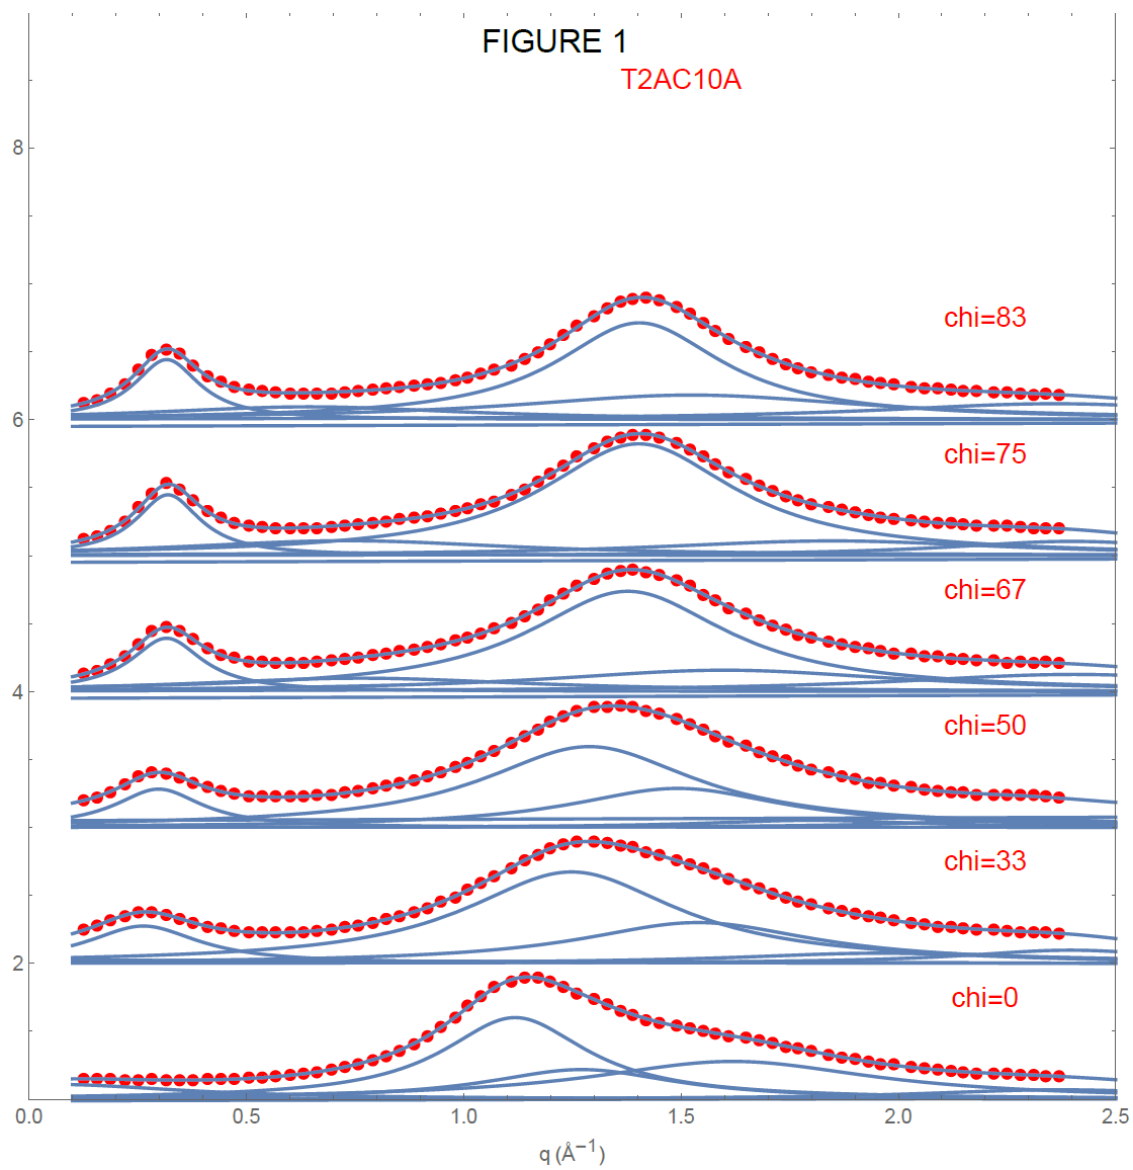



Figure S.6: Fitting functions and residuals for T2A C10A

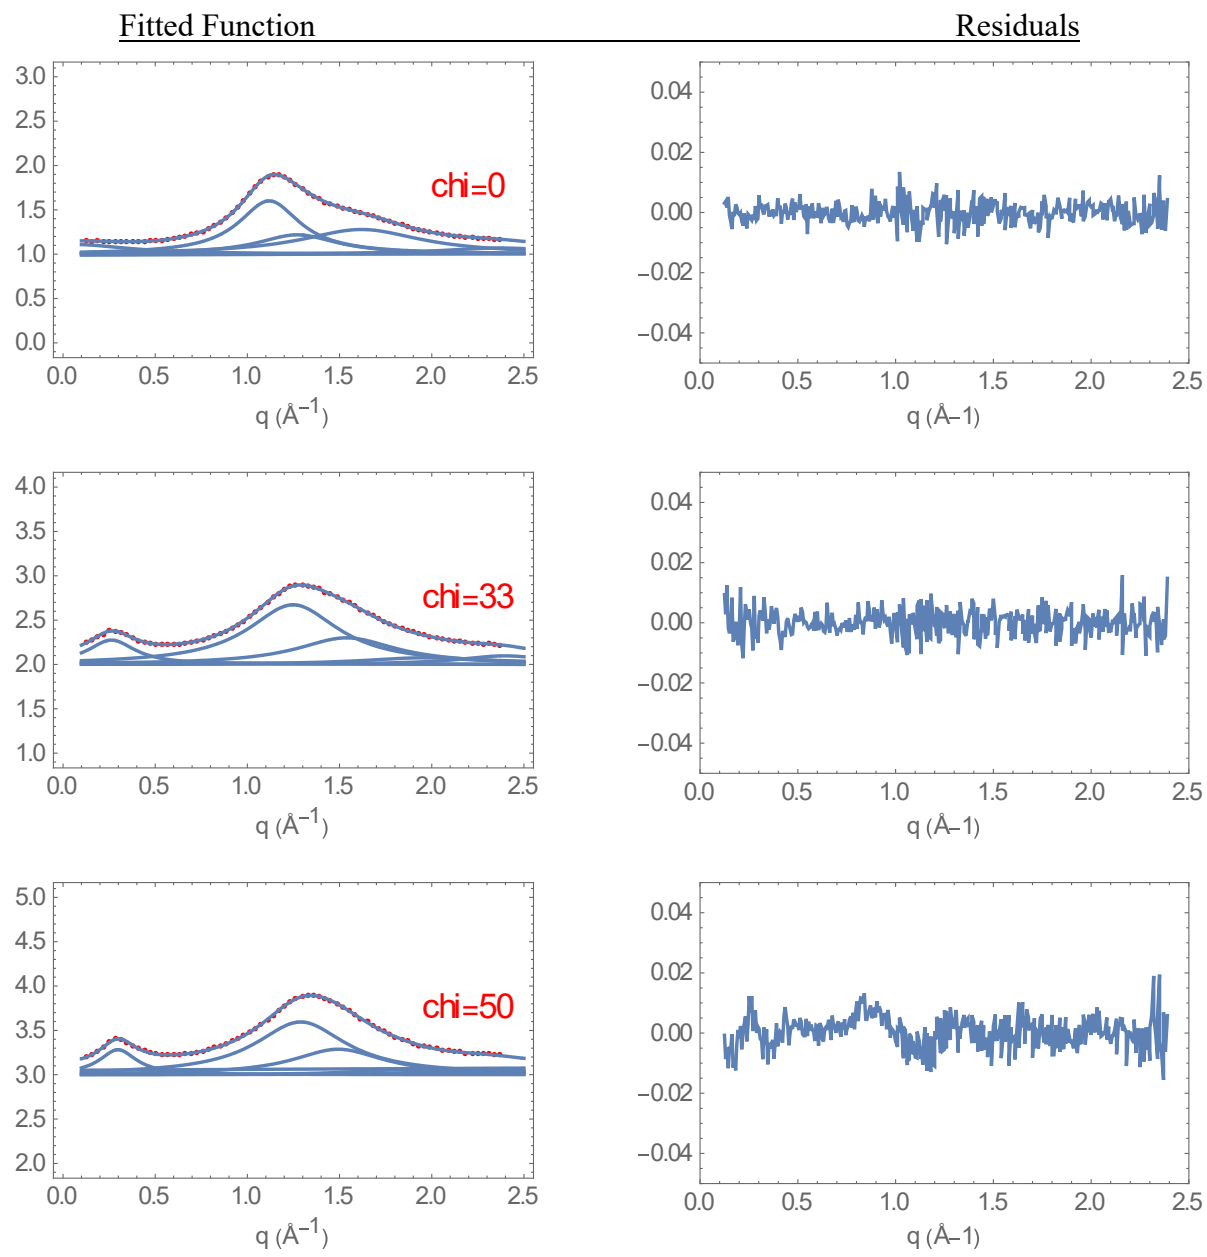

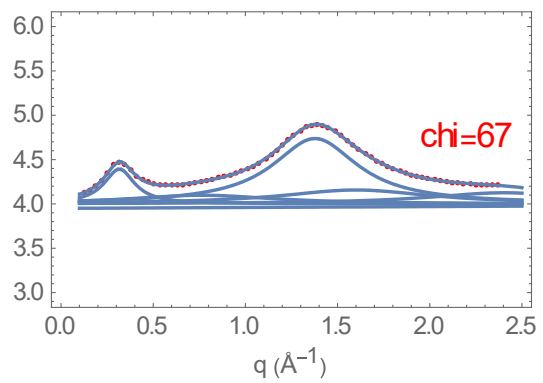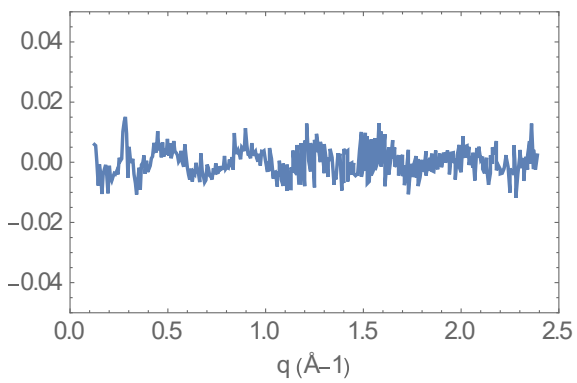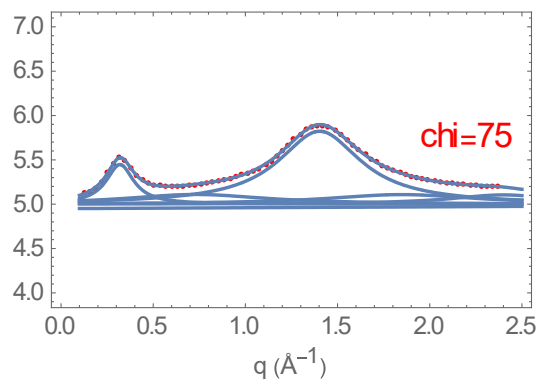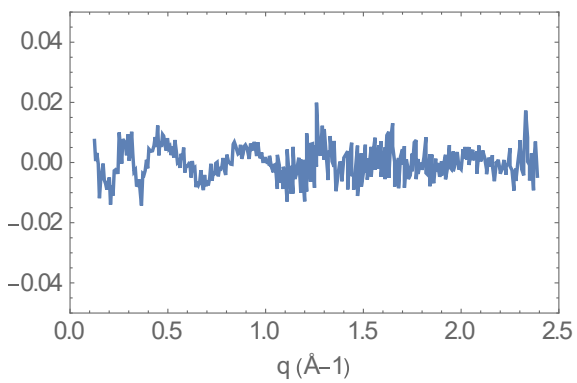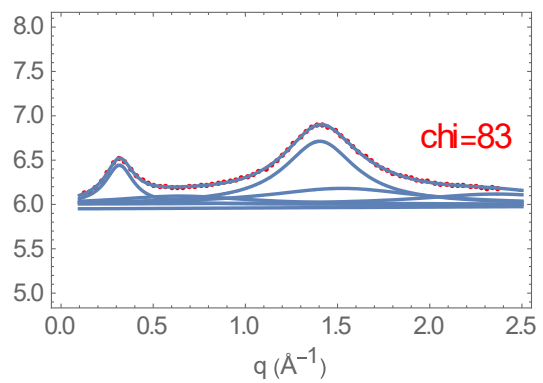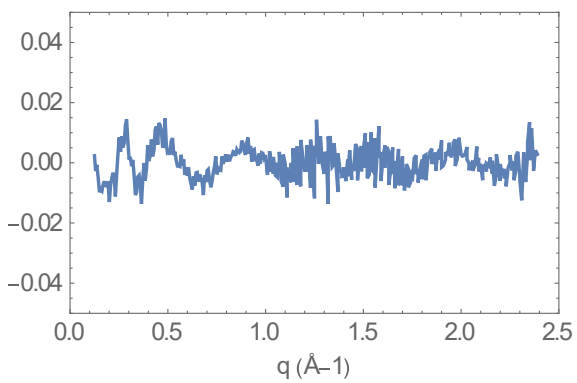

## T6AC2A

Table S.8: Local Structure Peaks for T6A C2A

|         | T6AC2A               |                      |          |
|---------|----------------------|----------------------|----------|
|         | q (Å <sup>-1</sup> ) | w (Å <sup>-1</sup> ) |          |
| chi=0   | 0.613009             | 0.260993             |          |
| chi=33  | 0.573249             | 0.220682             |          |
| chi=50  | 0.555645             | 0.200813             |          |
| chi=67  | 0.543551             | 0.169751             | 11.5595  |
| chi=75  | 0.523333             | 0.10412              | 12.00608 |
| chi=83  | 0.526188             | 0.108116             |          |
| chi=100 |                      |                      |          |

Table S.9: Fitting Parameters for T6A C2A

| a    | b           | q <sub>01</sub> | w <sub>1</sub> | A <sub>1</sub> | q <sub>02</sub> | w <sub>2</sub> | A <sub>2</sub> | q <sub>03</sub> | w <sub>3</sub> | A <sub>3</sub> | q <sub>04</sub> | w <sub>4</sub> | A <sub>4</sub> | q <sub>05</sub> | w <sub>5</sub> | A <sub>5</sub> |
|------|-------------|-----------------|----------------|----------------|-----------------|----------------|----------------|-----------------|----------------|----------------|-----------------|----------------|----------------|-----------------|----------------|----------------|
| 1.01 | 0.0088<br>6 | 0.142           | 0.069<br>3     | 8.99E-<br>05   | 0.613           | 0.261          | 0.00948        | 1.35            | 0.2            | 0.018<br>7     | 1.42            | 0.312          | 0.038<br>5     | 2.41            | 0.387          | 0.007<br>6     |
| 2.03 | 0.0087<br>6 | 0.0679          | 0.088          | 0.0015<br>3    | 0.573           | 0.221          | 0.00932        | 1.37            | 0.217          | 0.023<br>4     | 1.47            | 0.293          | 0.030<br>8     | 2.48            | 0.485          | 0.012<br>6     |
| 3.03 | 0.0099<br>8 | 0.0788          | 0.088<br>6     | 0.0017<br>4    | 0.556           | 0.201          | 0.00985        | 1.38            | 0.22           | 0.021<br>5     | 1.48            | 0.294          | 0.035<br>4     | 2.38            | 0.5            | 0.014<br>1     |
| 4.01 | 0.0098<br>7 | 0.544           | 0.17           | 0.0111         | 0.143           | 0.085<br>6     | 0.00039<br>9   | 1.45            | 0.262          | 0.056<br>6     | 1.95            | 0.498          | 0.011<br>9     | 2.58            | 0.495          | 0.018<br>5     |
| 5.02 | 0.0099<br>8 | 0.523           | 0.104          | 0.0029<br>4    | 0.598           | 0.149          | 0.00455        | 1.47            | 0.246          | 0.045<br>5     | 1.6             | 0.5            | 0.022          | 2.39            | 0.5            | 0.018<br>5     |
| 6.03 | 0.0099      | 0.526           | 0.108          | 0.0020<br>1    | 0.599           | 0.151          | 0.00505        | 1.49            | 0.234          | 0.036<br>6     | 2.39            | 0.498          | 0.019<br>4     | 1.56            | 0.499          | 0.041<br>6     |
| 7.05 | 0.0097<br>5 | 0.0040<br>4     | 0.222          | 0.0019<br>1    | 0.915           | 0.334          | 0.0246         | 1.65            | 0.347          | 0.045<br>7     | 2.47            | 0.499          | 0.043<br>4     | 1.51            | 0.227          | 0.021<br>4     |

Figure S.7: Fitting functions (blue) and raw data (red, 1/5<sup>th</sup> of points shown) for T6A C2A

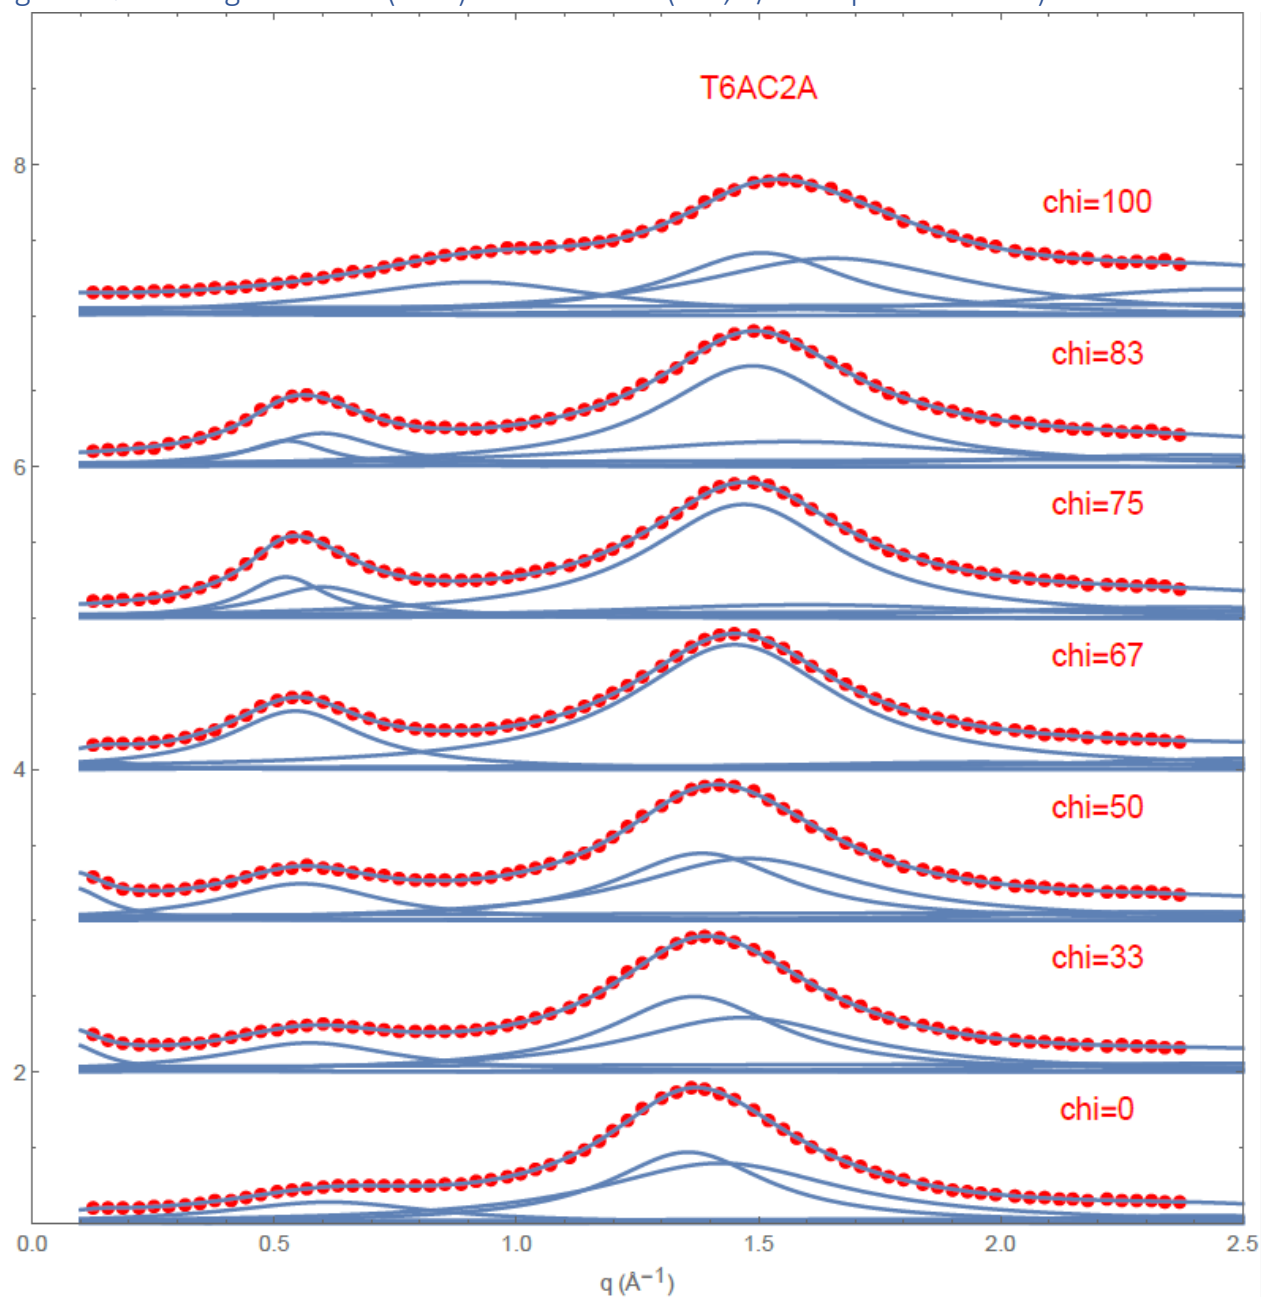

Figure S.8: Fitting functions and residuals for T6A C2A

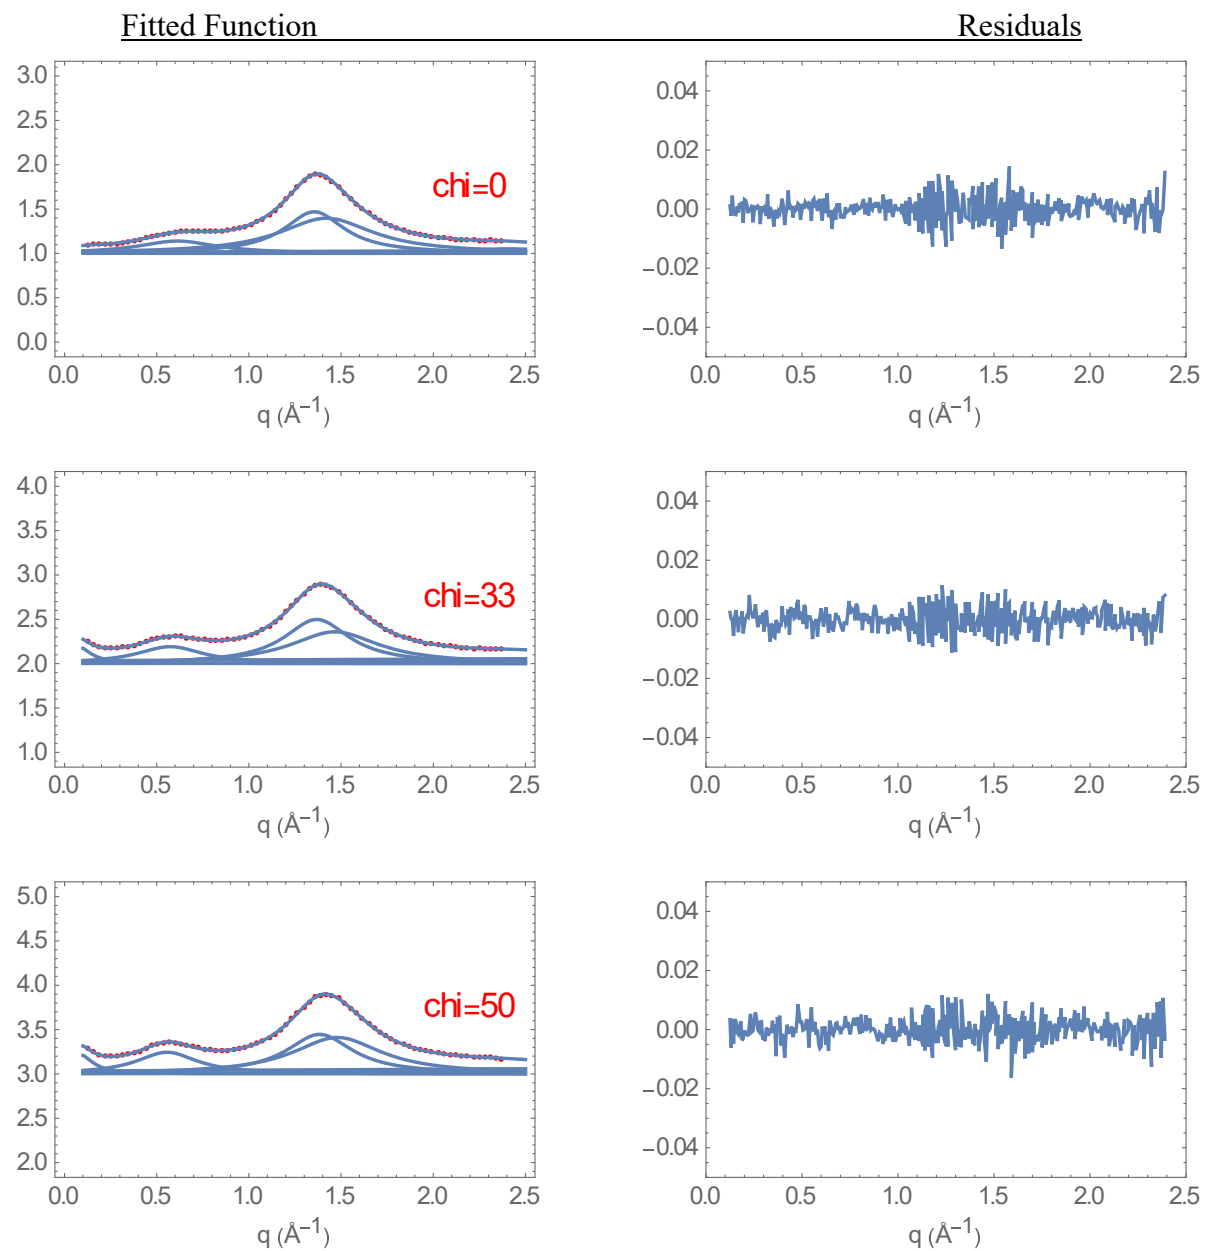

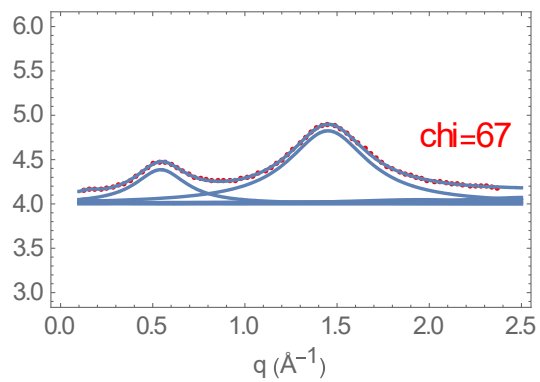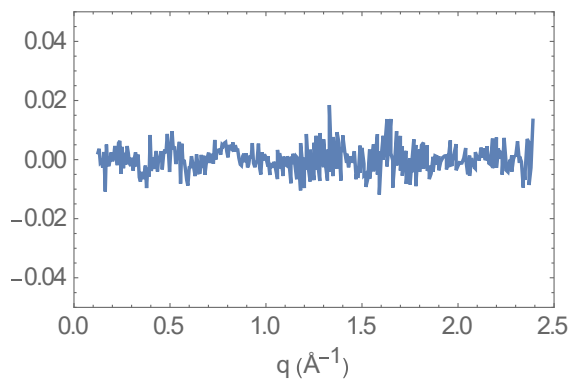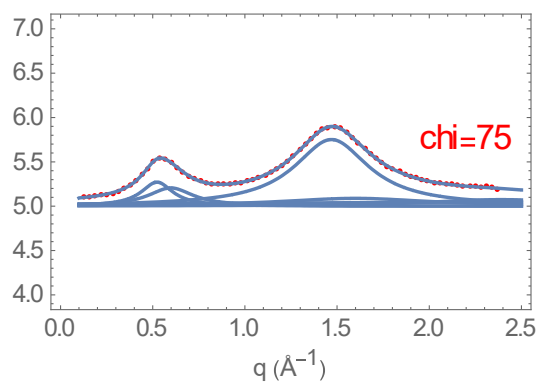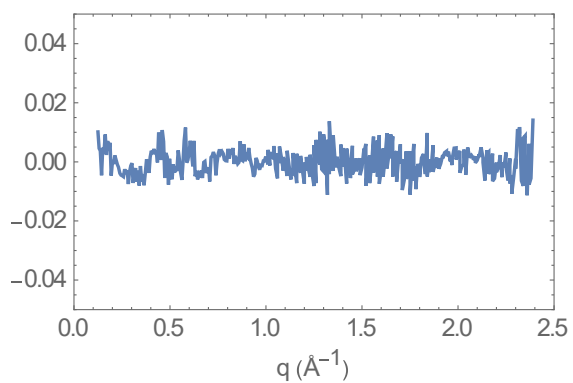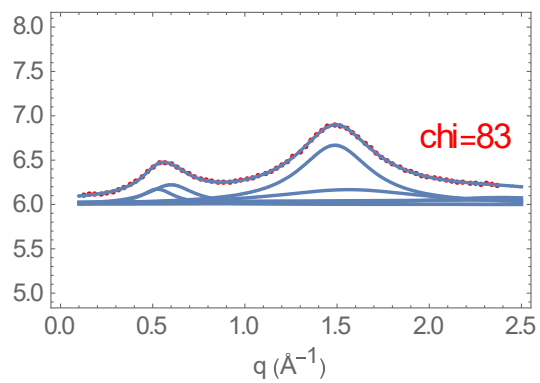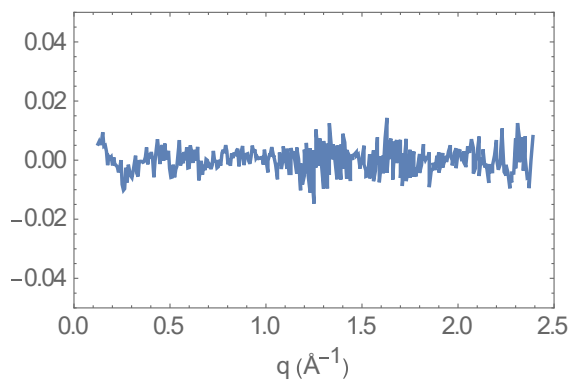

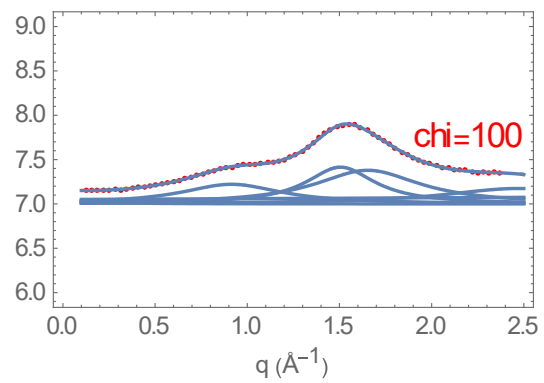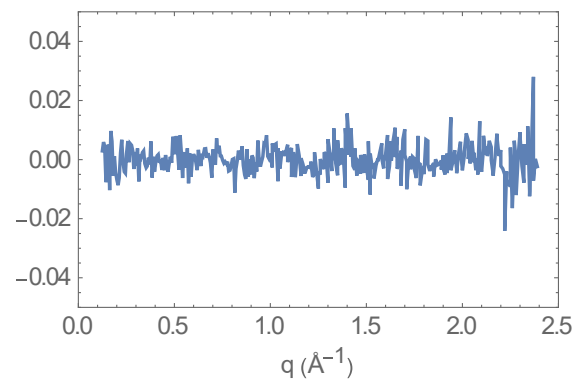

## T6A C6A

Table S.10: Local Structure Peaks for T6A C6A

| T6AC6A  |                      |                      |
|---------|----------------------|----------------------|
|         | q (Å <sup>-1</sup> ) | w (Å <sup>-1</sup> ) |
| chi=0   | 0.613009             | 0.260993             |
| chi=33  | 0.529271             | 0.244364             |
| chi=50  | 0.529266             | 0.244353             |
| chi=67  | 0.472806             | 0.127198             |
| chi=75  | 0.468122             | 0.106287             |
| chi=83  | 0.458002             | 0.109736             |
| chi=100 | 0.473993             | 0.192415             |

Table S.11: Fitting Parameters for T6A C6A

| a    | b            | q <sub>01</sub> | w <sub>1</sub> | A <sub>1</sub> | q <sub>02</sub> | w <sub>2</sub> | A <sub>2</sub> | q <sub>03</sub> | w <sub>3</sub> | A <sub>3</sub> | q <sub>04</sub> | w <sub>4</sub> | A <sub>4</sub> | q <sub>05</sub> | w <sub>5</sub> | A <sub>5</sub> |
|------|--------------|-----------------|----------------|----------------|-----------------|----------------|----------------|-----------------|----------------|----------------|-----------------|----------------|----------------|-----------------|----------------|----------------|
| 1.01 | 0.00886      | 0.142           | 0.069<br>3     | 8.99E-<br>05   | 0.613           | 0.261          | 0.0094<br>8    | 1.35            | 0.2            | 0.0187         | 1.42            | 0.312          | 0.038<br>5     | 2.41            | 0.387          | 0.0076         |
| 2    | 0.00994      | 0.123           | 0.125          | 0.0011<br>2    | 0.529           | 0.244          | 0.0135         | 1.38            | 0.23           | 0.0379         | 1.54            | 0.35           | 0.019<br>8     | 2.43            | 0.5            | 0.0192         |
| 3    | 0.00998      | 0.529           | 0.244          | 0.0135         | 0.123           | 0.125          | 0.0011<br>2    | 1.38            | 0.23           | 0.0379         | 1.54            | 0.35           | 0.019<br>8     | 2.43            | 0.5            | 0.0192         |
| 4.03 | -<br>0.00999 | 0.473           | 0.127          | 0.0072<br>6    | 0.629           | 0.154          | 0.0011<br>4    | 1.41            | 0.231          | 0.0405         | 1.63            | 0.346          | 0.015<br>2     | 2.36            | 0.5            | 0.028          |
| 5.01 | -<br>0.00999 | 0.468           | 0.106          | 0.0052<br>3    | 0.577           | 0.188          | 0.0037<br>5    | 1.43            | 0.238          | 0.0452         | 1.69            | 0.378          | 0.015<br>7     | 2.36            | 0.5            | 0.0314         |
| 5.99 | -<br>0.00994 | 0.458           | 0.11           | 0.0057<br>8    | 0.6             | 0.221          | 0.0048<br>3    | 1.44            | 0.246          | 0.0495         | 2.44            | 0.499          | 0.034<br>1     | 1.79            | 0.464          | 0.0198         |
| 7.01 | -0.0097      | 0.636           | 0.254          | 0.0067<br>4    | 1.43            | 0.258          | 0.0544         | 2.42            | 0.499          | 0.0354         | 1.8             | 0.498          | 0.014<br>8     | 0.474           | 0.192          | 0.0068<br>8    |



Figure S.9: Fitting functions (blue) and raw data (red, 1/5th of points shown) for T6A C6A

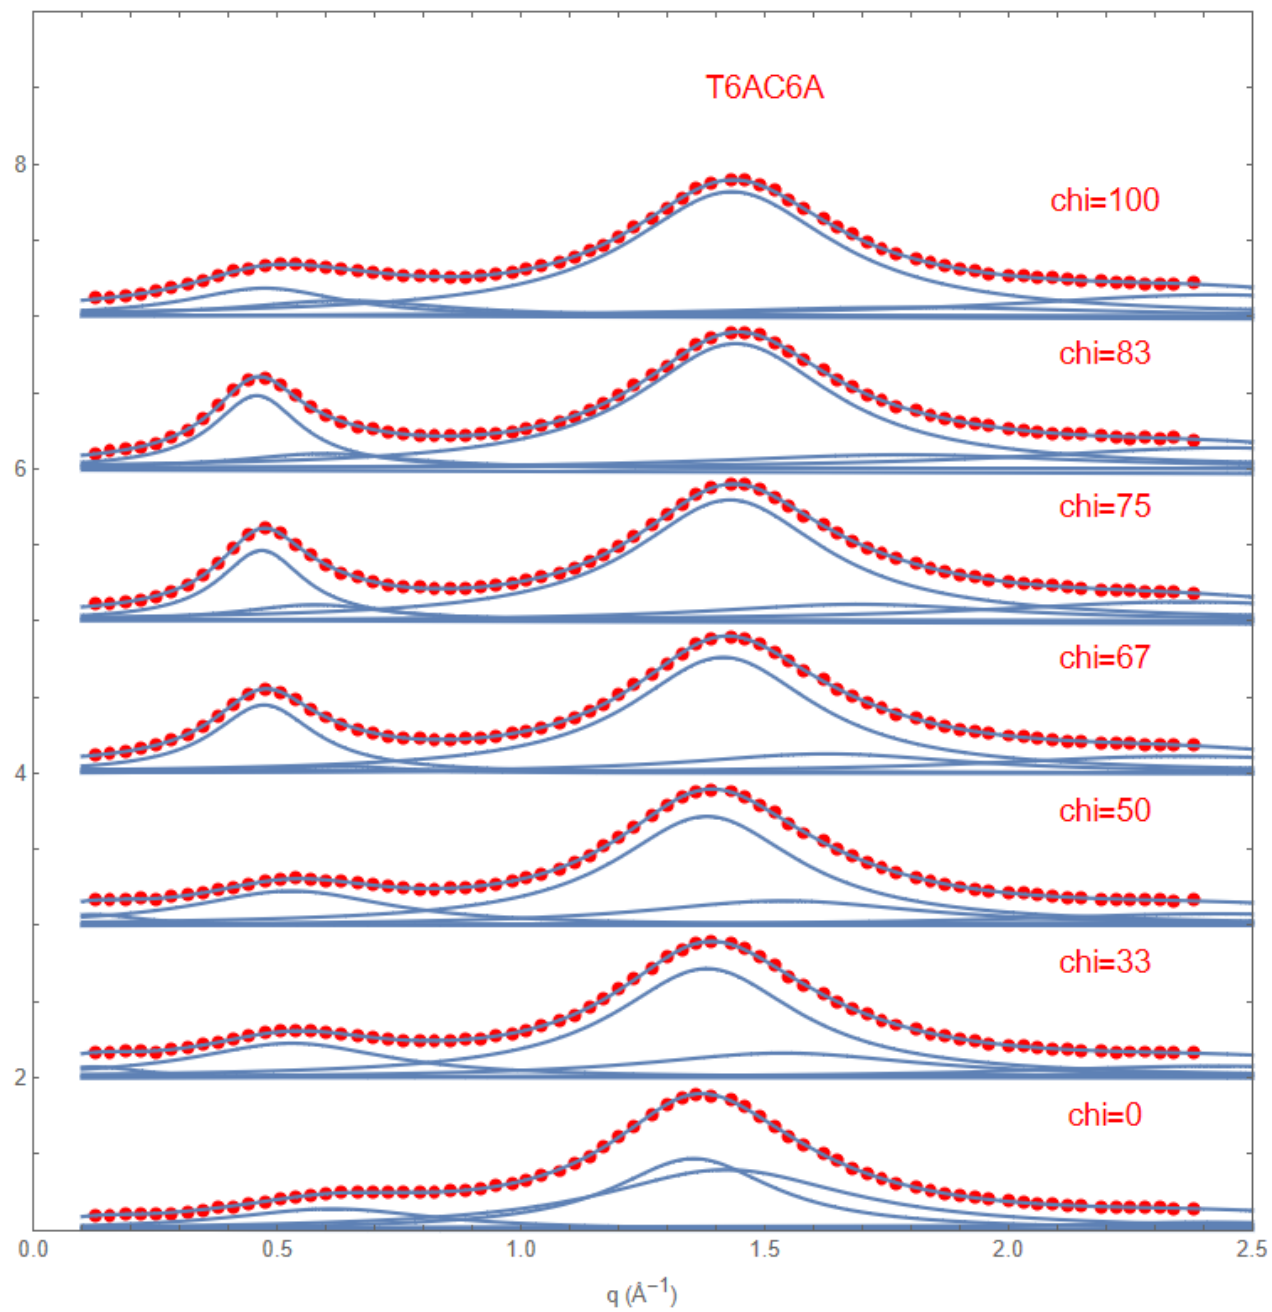

Figure S.10: Fitting functions and residuals for T6A C6A

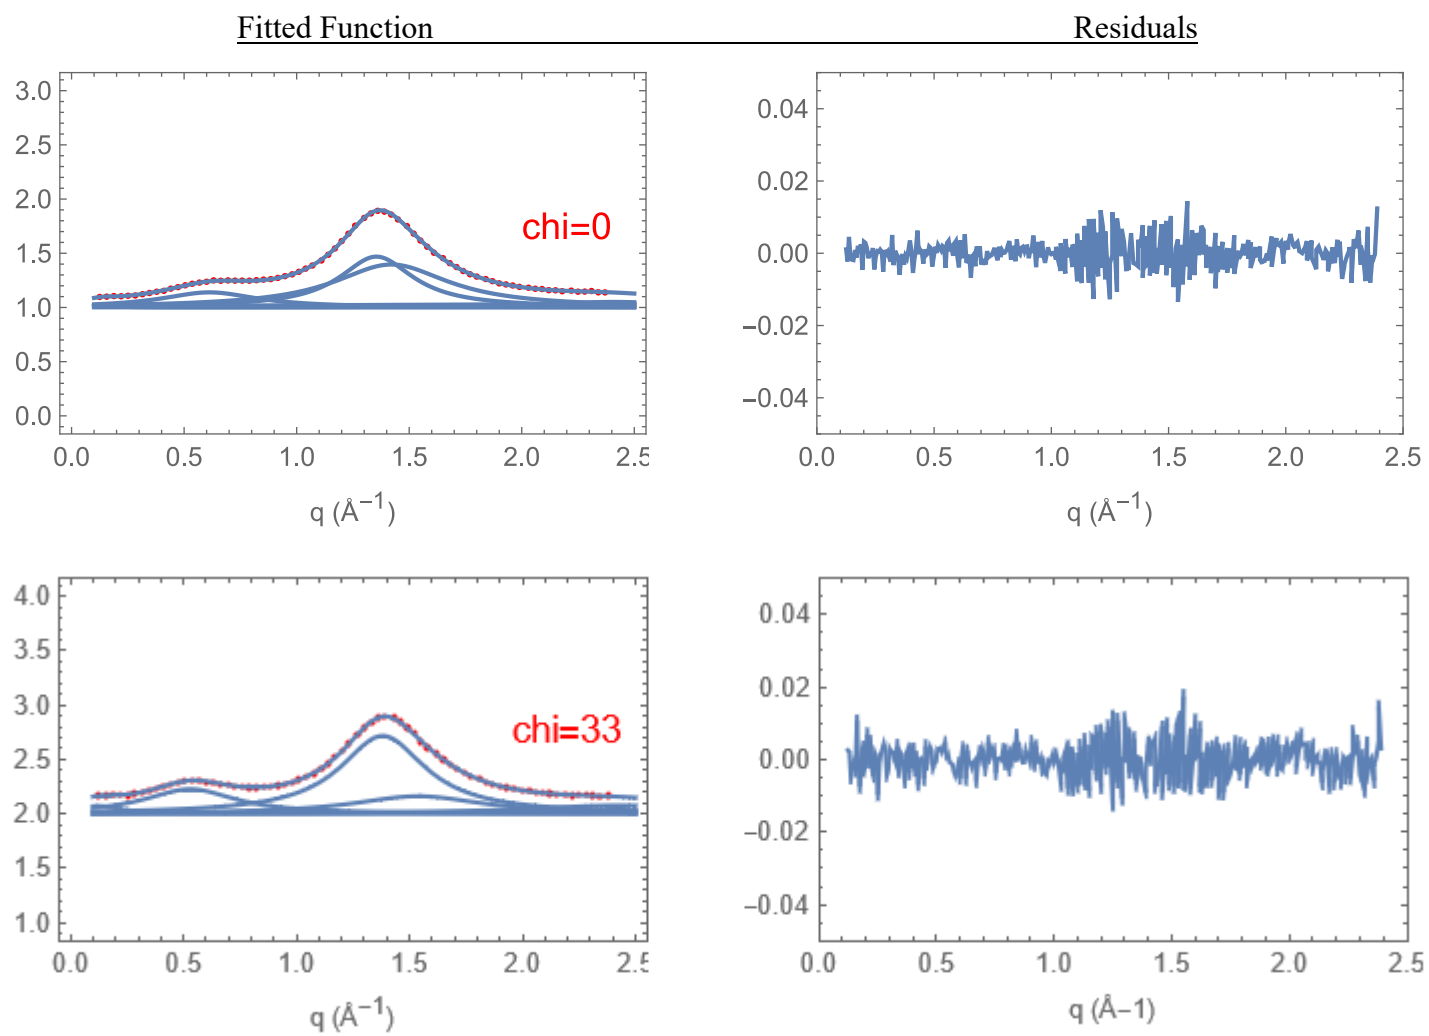

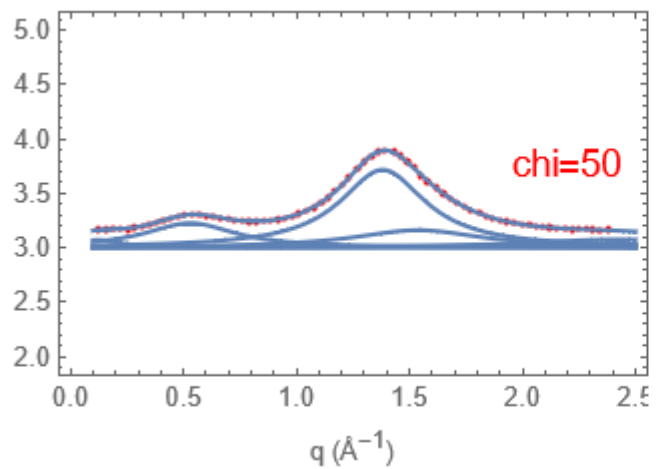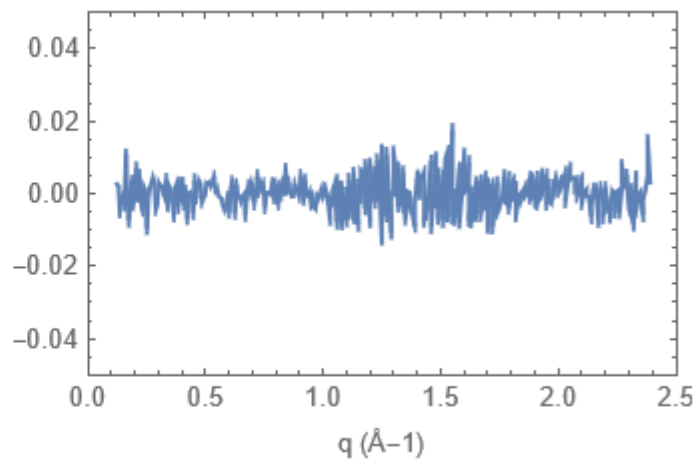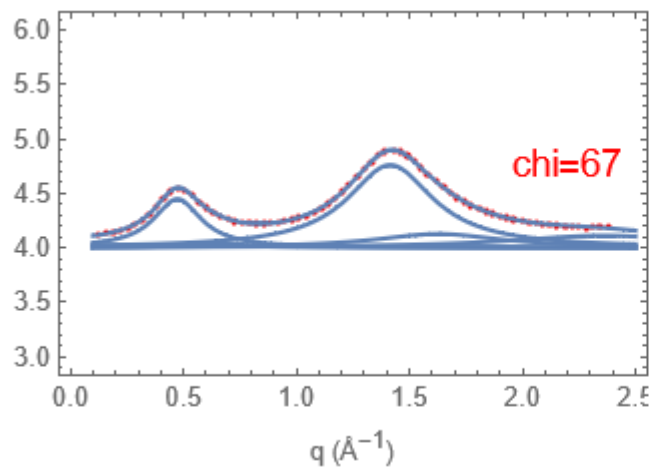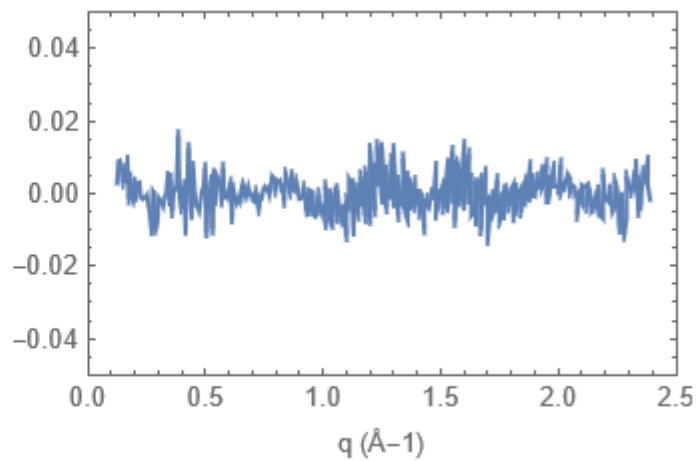

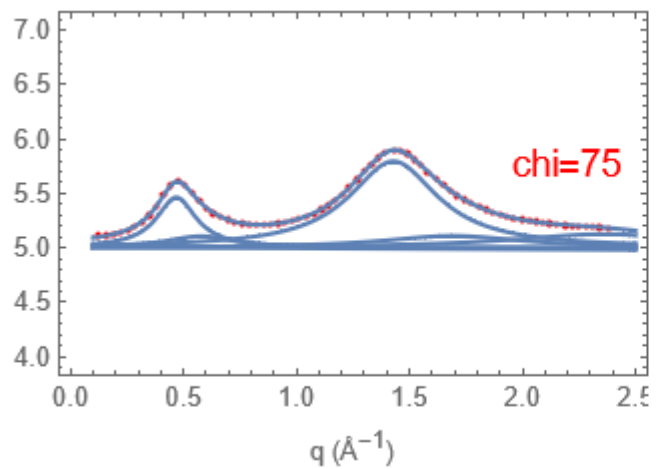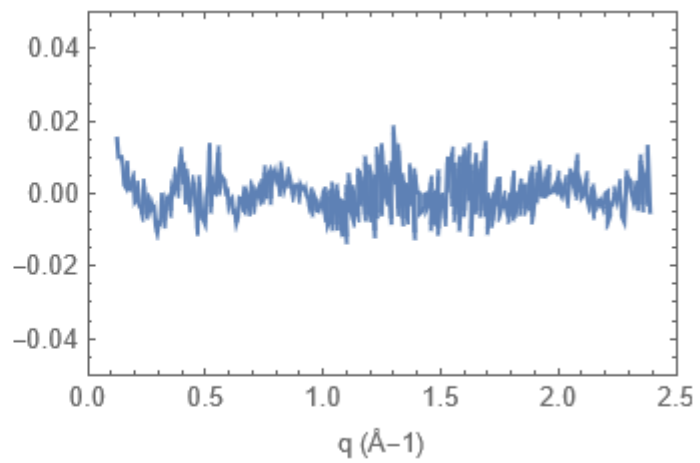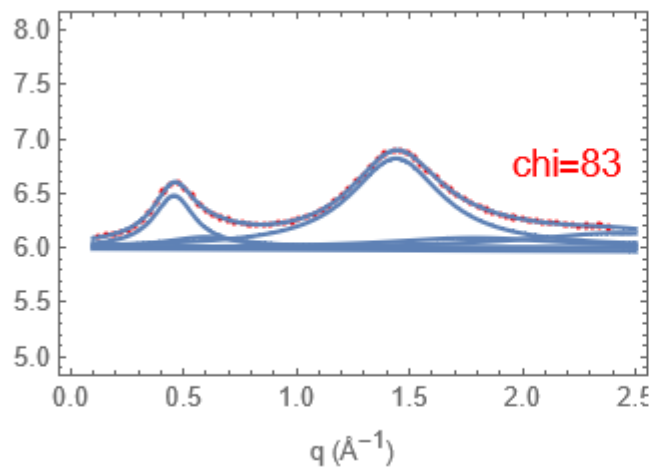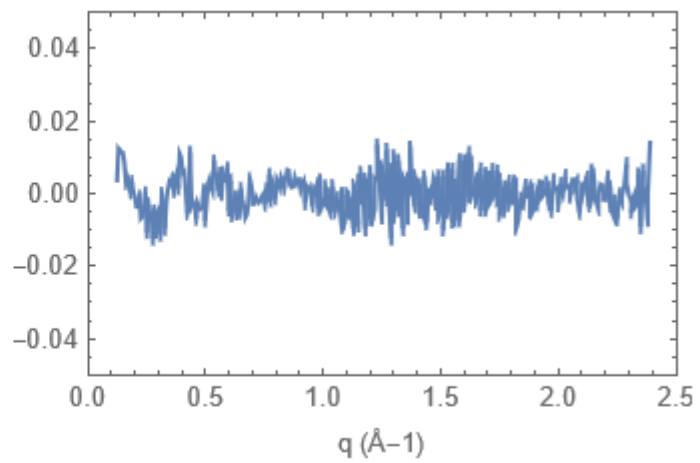

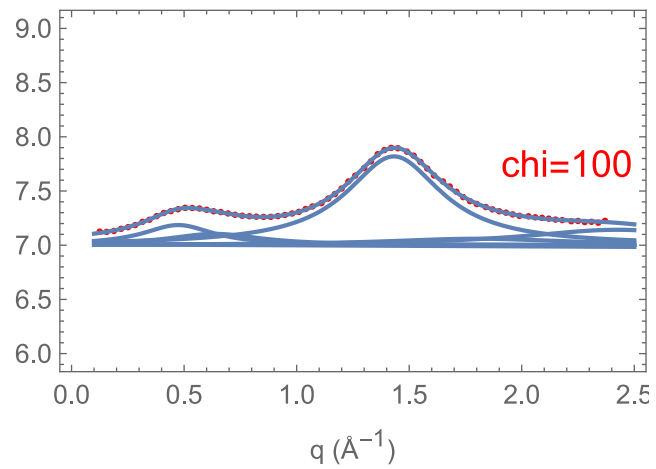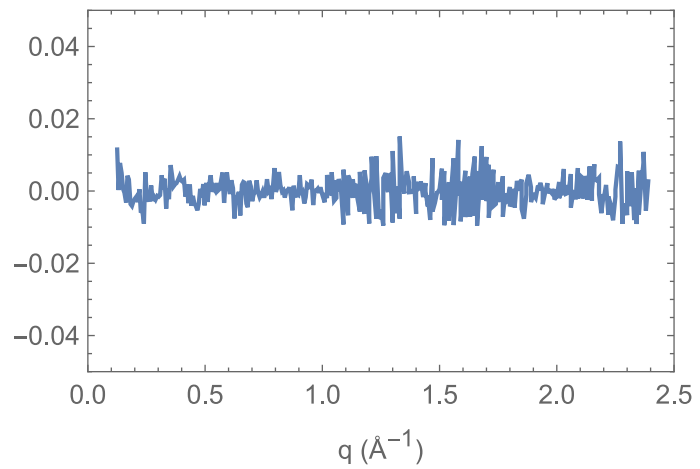

T6AC8A

Table S.12: Local Structure Peaks for T6A C8A

| T6AC8A  |                      |                      |          |
|---------|----------------------|----------------------|----------|
|         | q (Å <sup>-1</sup> ) | w (Å <sup>-1</sup> ) |          |
| chi=0   |                      |                      |          |
| chi=33  | 0.503223             | 0.280679             |          |
| chi=50  | 0.458145             | 0.226522             |          |
| chi=67  | 0.432352             | 0.131595             | 14.53256 |
| chi=75  | 0.430672             | 0.122167             | 14.58925 |
| chi=83  | 0.418464             | 0.117655             |          |
| chi=100 | 0.41763              | 0.185602             |          |

Table S.13: Fitting Parameters for T6A C8A

| a    | b           | q <sub>01</sub> | w <sub>1</sub> | A <sub>1</sub> | q <sub>02</sub> | w <sub>2</sub> | A <sub>2</sub> | q <sub>03</sub> | w <sub>3</sub> | A <sub>3</sub> | q <sub>04</sub> | w <sub>4</sub> | A <sub>4</sub> | q <sub>05</sub> | w <sub>5</sub> | A <sub>5</sub> |
|------|-------------|-----------------|----------------|----------------|-----------------|----------------|----------------|-----------------|----------------|----------------|-----------------|----------------|----------------|-----------------|----------------|----------------|
| 1.01 | 0.0088<br>6 | 0.142           | 0.069<br>3     | 8.99E-<br>05   | 0.613           | 0.261          | 0.0094<br>8    | 1.35            | 0.2            | 0.0187         | 1.42            | 0.312          | 0.038<br>5     | 2.41            | 0.387          | 0.007<br>6     |
| 2.01 | 0.0099<br>4 | 0.055<br>5      | 0.146          | 0.0011<br>9    | 0.503           | 0.281          | 0.0159         | 1.38            | 0.215          | 0.032          | 1.53            | 0.329          | 0.019<br>6     | 2.43            | 0.5            | 0.015<br>8     |
| 3.02 | 0.0099<br>8 | 0.458           | 0.227          | 0.0136         | 0.092<br>1      | 0.051          | 8.06E-5        | 1.38            | 0.205          | 0.0268         | 1.53            | 0.323          | 0.024<br>6     | 2.42            | 0.5            | 0.015<br>6     |
| 4.01 | 0.01        | 0.432           | 0.132          | 0.0066<br>9    | 0.603           | 0.159          | 0.0015<br>9    | 0.879           | 0.363          | 4.57e-7        | 1.42            | 0.232          | 0.044<br>4     | 2.09            | 0.5            | 0.021          |
| 5.01 | 0.0099<br>8 | 0.431           | 0.122          | 0.0051<br>3    | 0.551           | 0.218          | 0.0048<br>7    | 1.57            | 0.345          | 0.0232         | 1.41            | 0.209          | 0.029<br>9     | 2.35            | 0.5            | 0.018<br>4     |
| 5.97 | 0.0099<br>8 | 0.418           | 0.118          | 0.0056<br>4    | 0.582           | 0.27           | 0.0066<br>1    | 2.39            | 0.5            | 0.0248         | 1.41            | 0.205          | 0.028<br>6     | 1.56            | 0.41           | 0.037<br>2     |
| 6.96 | 0.0094<br>8 | 0.418           | 0.186          | 0.0079         | 0.674           | 0.466          | 0.0146         | 2.46            | 0.498          | 0.0303         | 1.41            | 0.218          | 0.035<br>1     | 1.59            | 0.479          | 0.035<br>3     |

Figure S.11: Fitting functions (blue) and raw data (red, 1/5<sup>th</sup> of points shown) for T6A C8A

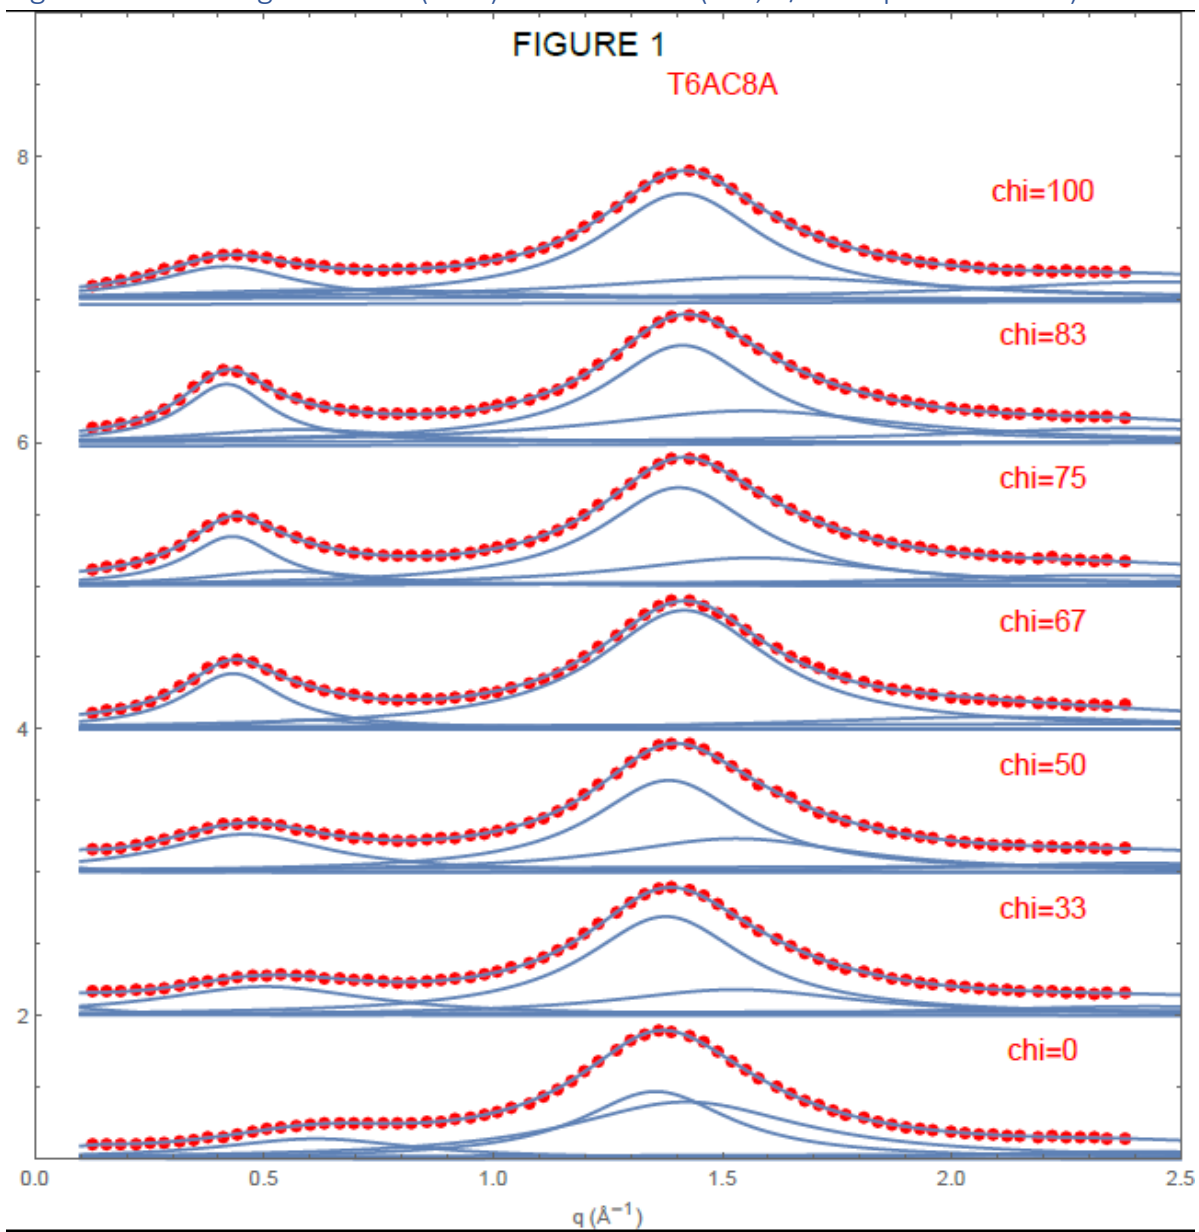

Figure S.12: Fitting functions and residuals for T6A C8A

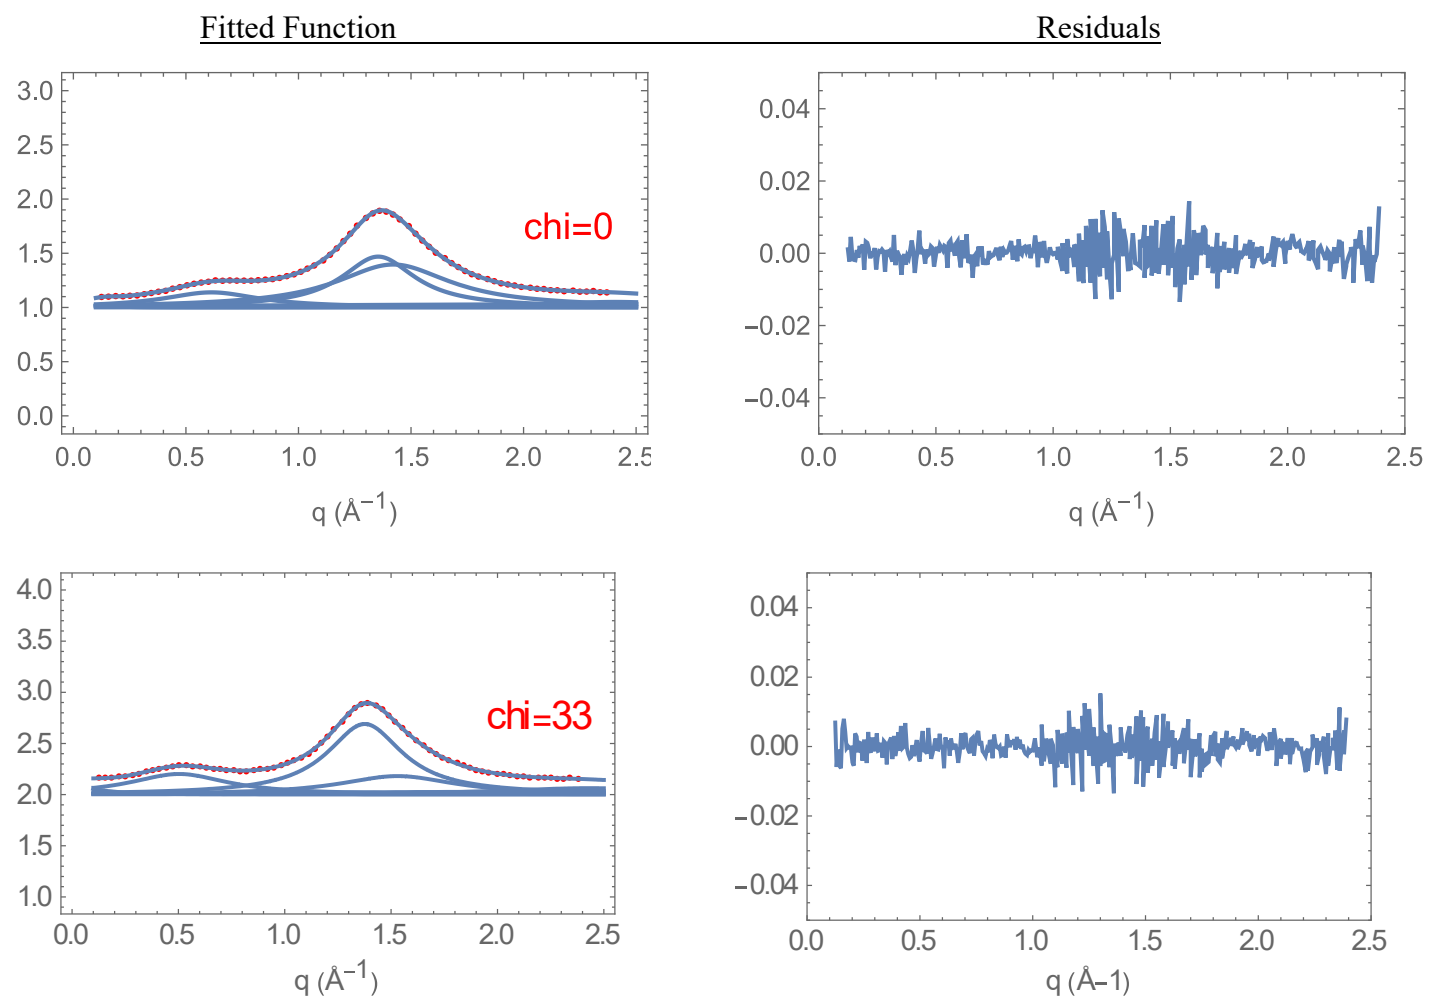



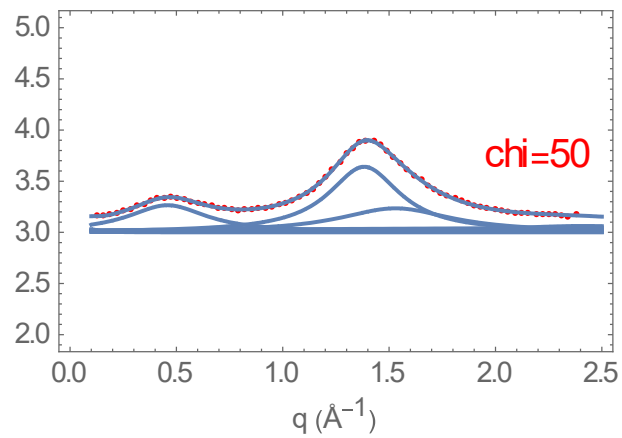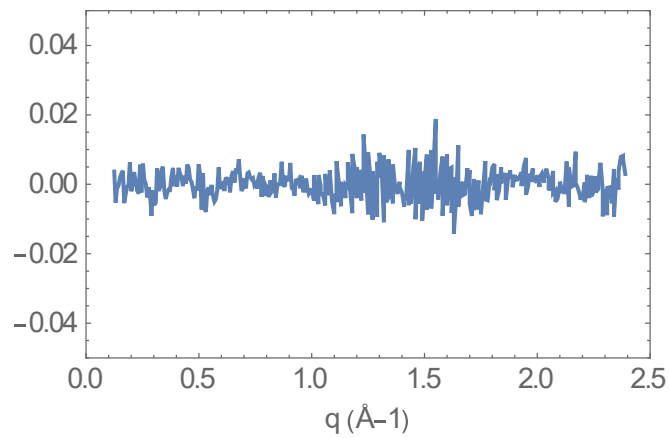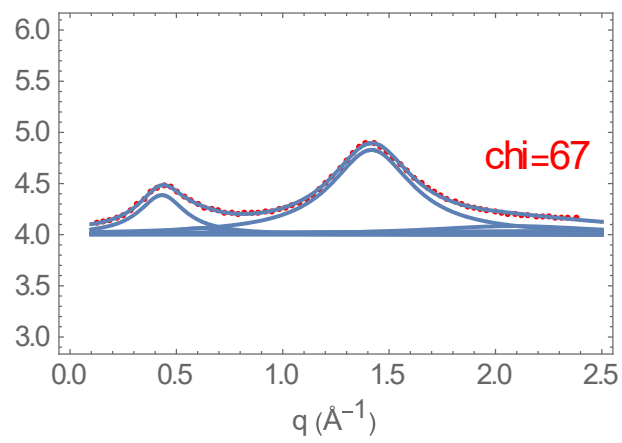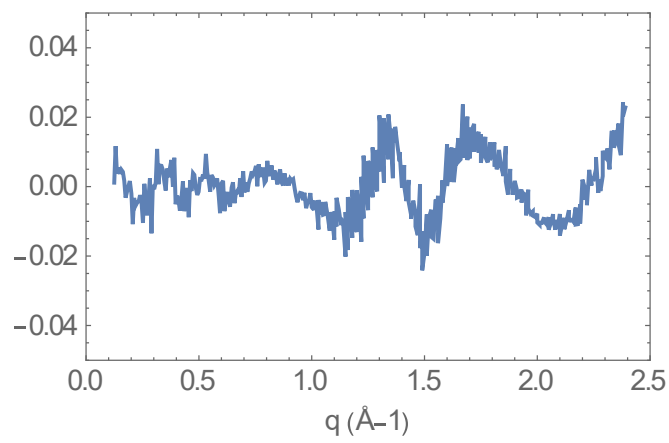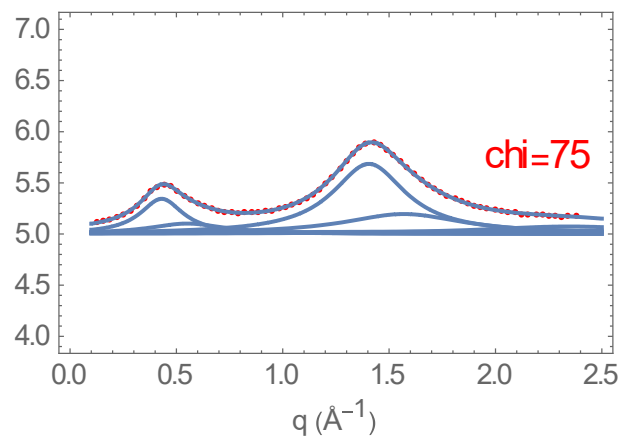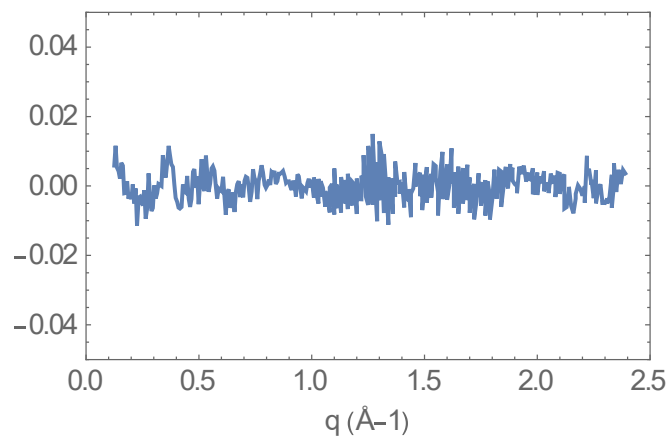

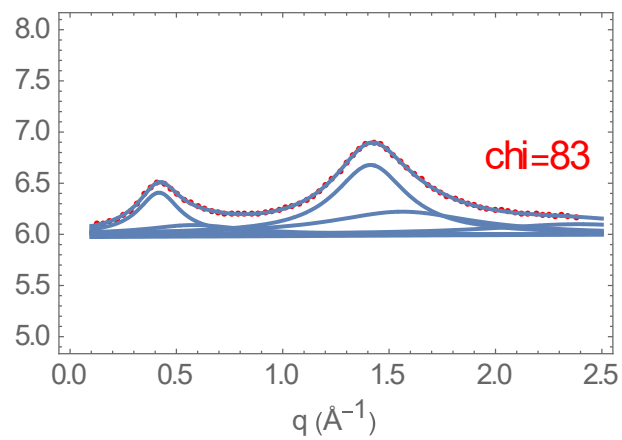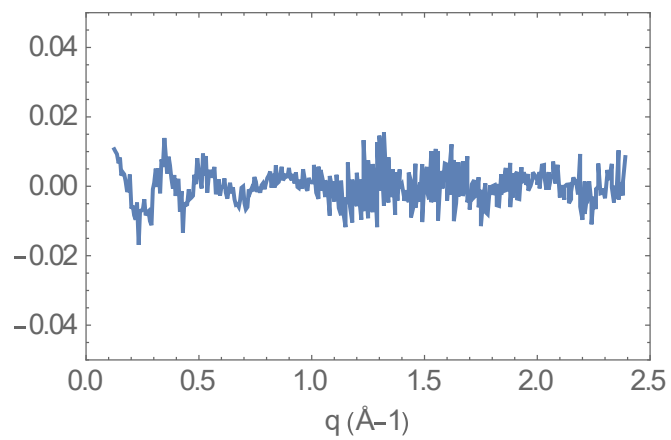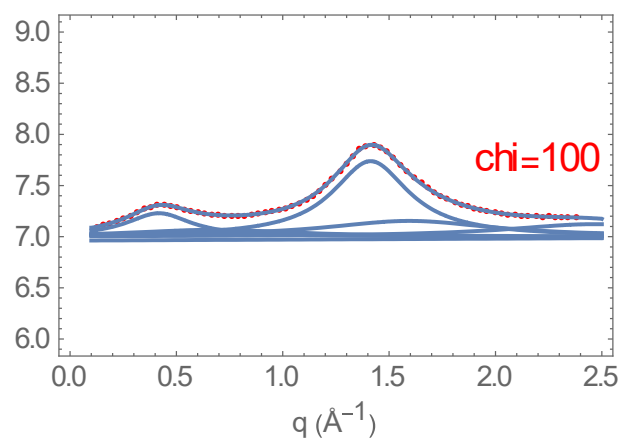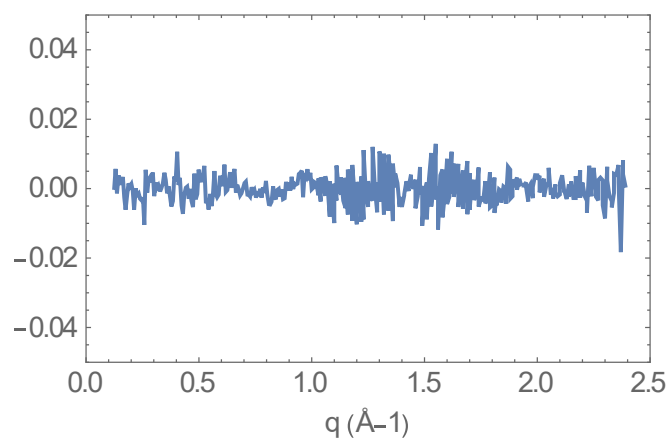

T6AC10A

Table S.14: Local Structure Peaks for T6A C10A

| T6AC10A |                      |                      |
|---------|----------------------|----------------------|
|         | q (Å <sup>-1</sup> ) | w (Å <sup>-1</sup> ) |
| chi=0   |                      |                      |
| chi=33  | 0.486996             | 0.323142             |
| chi=50  | 0.422383             | 0.280071             |
| chi=67  | 0.392374             | 0.142354             |
| chi=75  | 0.395107             | 0.119866             |
| chi=83  | 0.376269             | 0.116727             |

Table S.15: Fitting Parameters for T6A C10A

| a    | b        | q <sub>01</sub> | w <sub>1</sub> | A <sub>1</sub> | q <sub>02</sub> | w <sub>2</sub> | A <sub>2</sub> | q <sub>03</sub> | w <sub>3</sub> | A <sub>3</sub> | q <sub>04</sub> | w <sub>4</sub> | A <sub>4</sub> | q <sub>05</sub> | w <sub>5</sub> | A <sub>5</sub> |
|------|----------|-----------------|----------------|----------------|-----------------|----------------|----------------|-----------------|----------------|----------------|-----------------|----------------|----------------|-----------------|----------------|----------------|
| 1.01 | 0.00886  | 0.142           | 0.0693         | 8.99E-05       | 0.613           | 0.261          | 0.00948        | 1.35            | 0.2            | 0.0187         | 1.42            | 0.312          | 0.0385         | 2.41            | 0.387          | 0.0076         |
| 2.05 | -0.00929 | 2.41            | 0.431          | 0.0134         | 1.37            | 0.206          | 0.0238         | 1.48            | 0.228          | 0.0148         | 0.487           | 0.323          | 0.0174         | 1.73            | 0.349          | 0.00785        |
| 2.97 | 0.00999  | 2.48            | 0.499          | 0.0215         | 1.34            | 0.165          | 0.00663        | 1.51            | 0.5            | 0.051          | 0.422           | 0.28           | 0.0212         | 1.44            | 0.21           | 0.021          |
| 3.95 | 0.00708  | 0.586           | 0.343          | 0.0135         | 0.392           | 0.142          | 0.00662        | 2.38            | 0.6            | 0.0433         | 1.62            | 0.379          | 0.019          | 1.41            | 0.223          | 0.0385         |
| 4.95 | 0.00997  | 0.588           | 0.331          | 0.0131         | 0.395           | 0.12           | 0.00536        | 2.36            | 0.5            | 0.0276         | 1.64            | 0.418          | 0.0252         | 1.42            | 0.219          | 0.0374         |
| 5.95 | 0.00999  | 0.604           | 0.335          | 0.012          | 0.376           | 0.117          | 0.00524        | 2.42            | 0.5            | 0.0269         | 1.66            | 0.474          | 0.0309         | 1.43            | 0.22           | 0.038          |

Figure S.13: Fitting functions (blue) and raw data (red, 1/5<sup>th</sup> of points shown) for T6A C10A

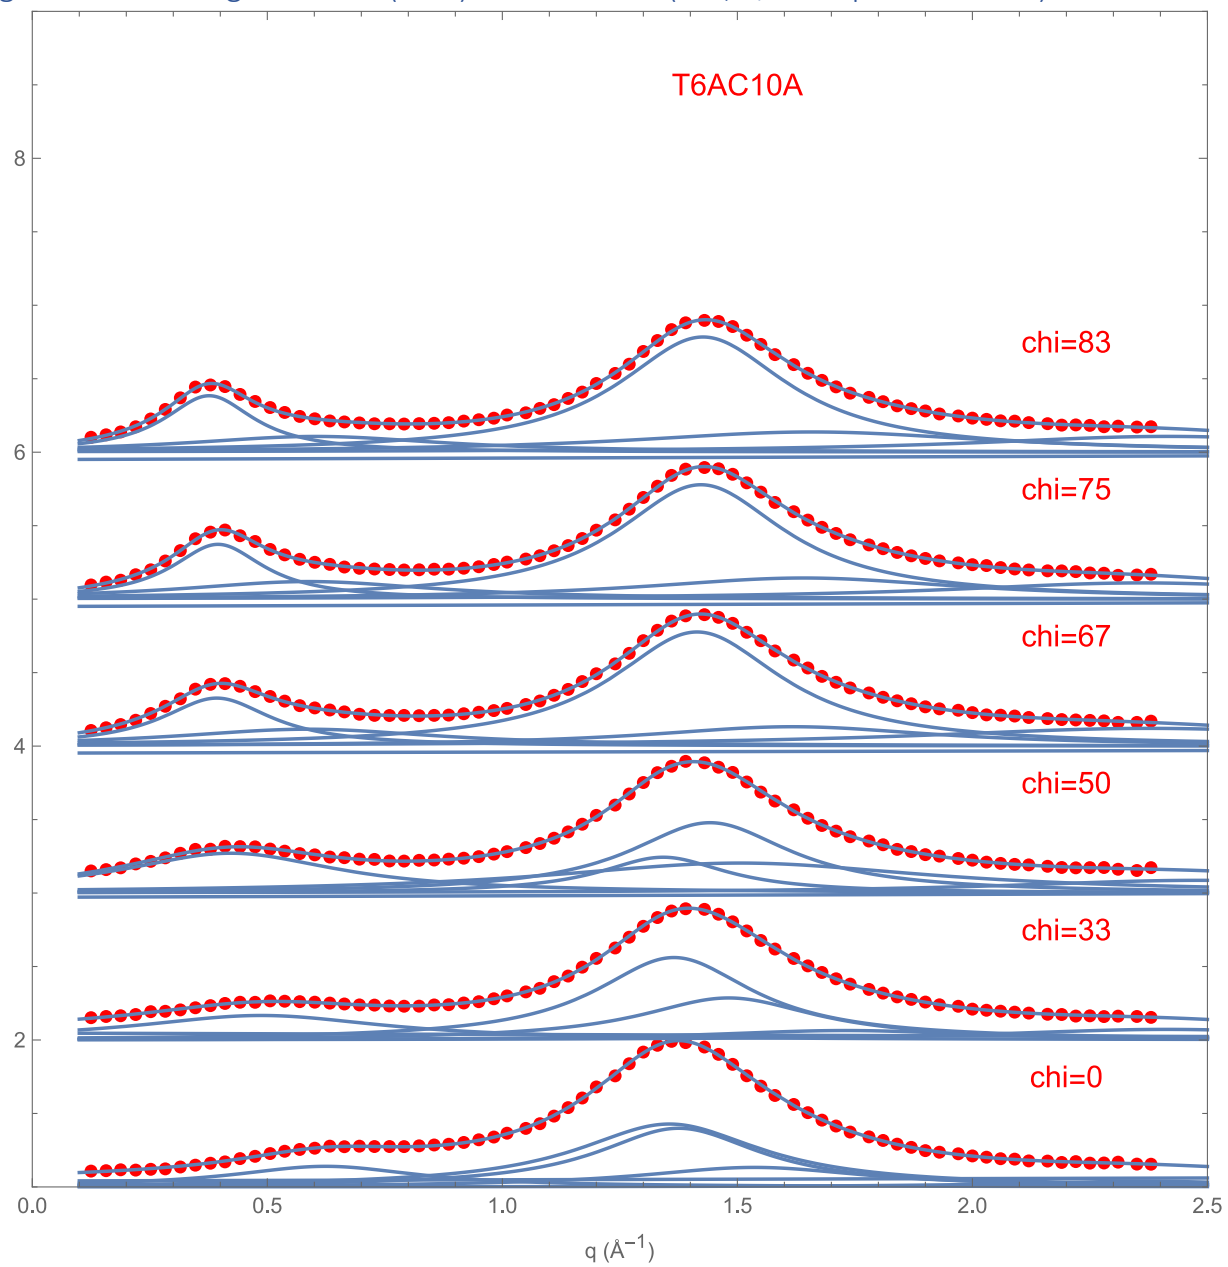

Figure S.14: Fitting functions and residuals for T6A C10A

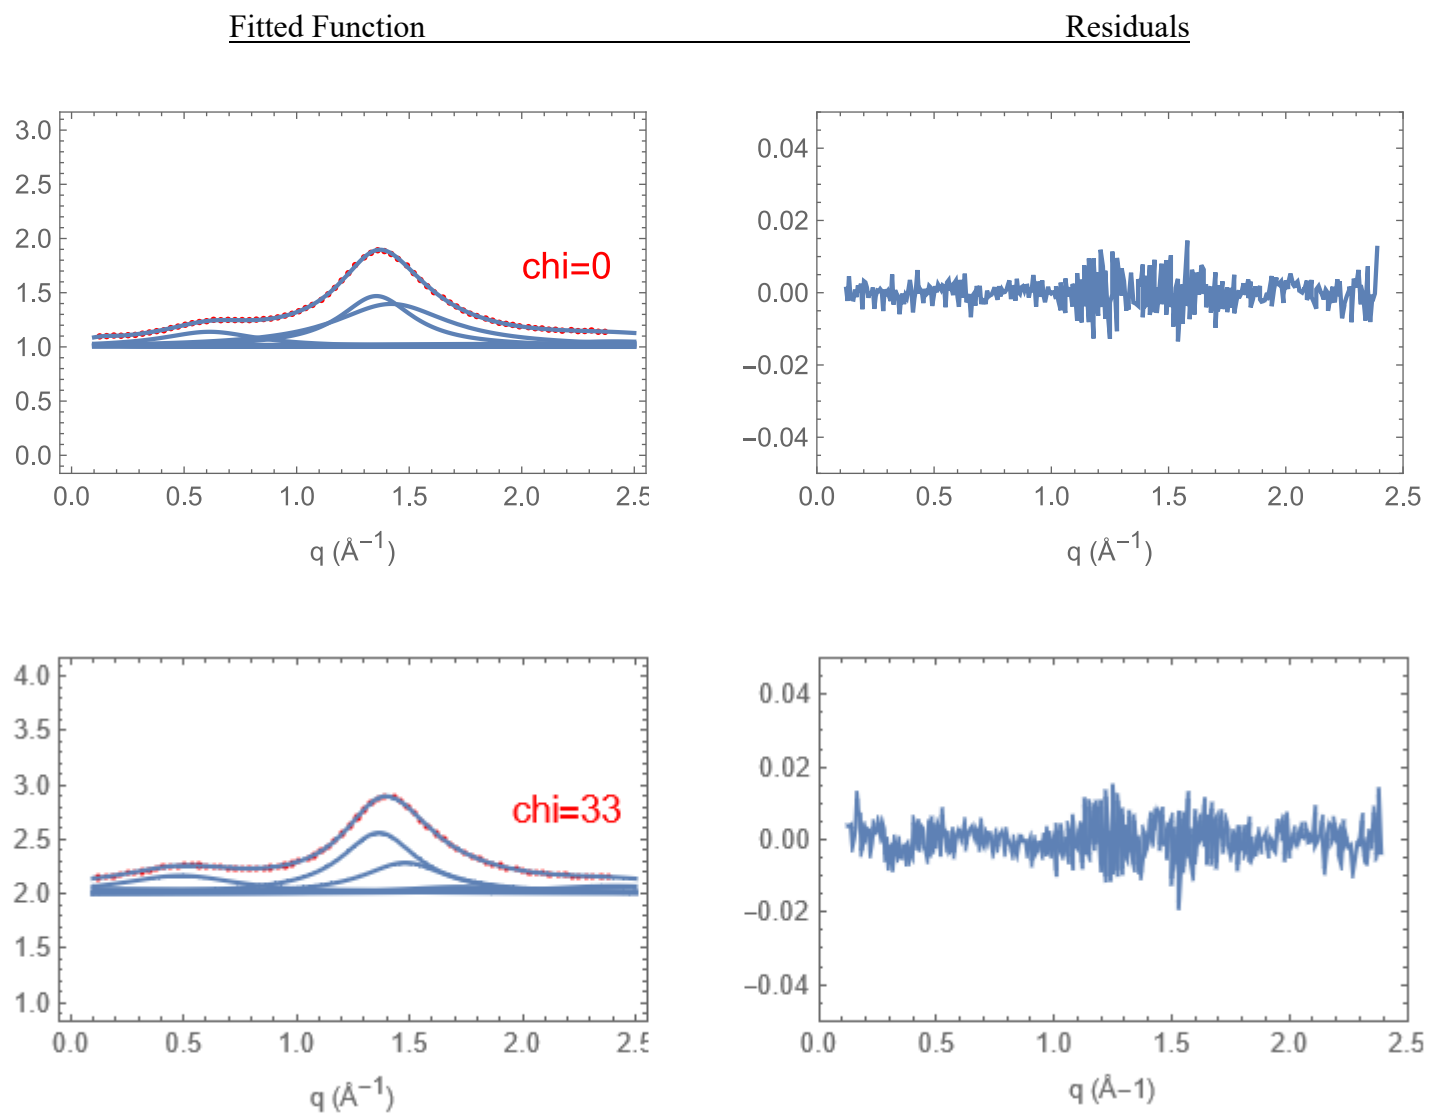

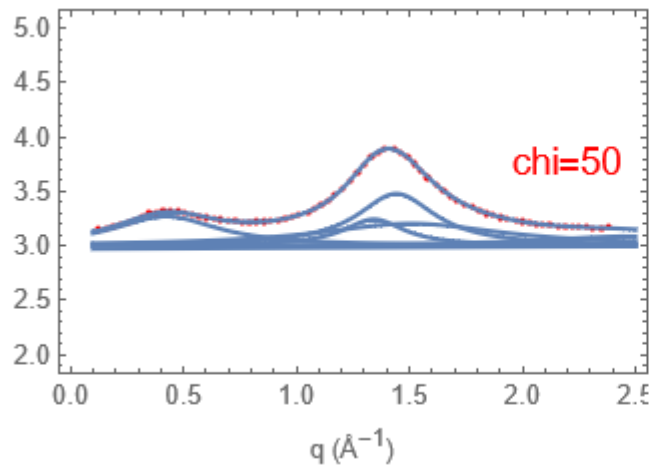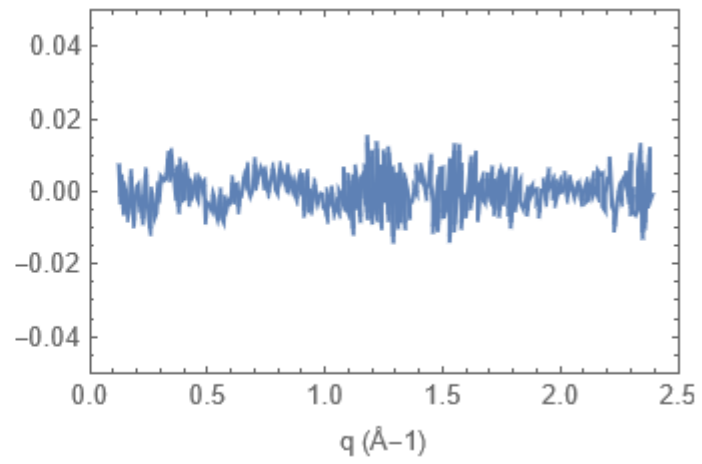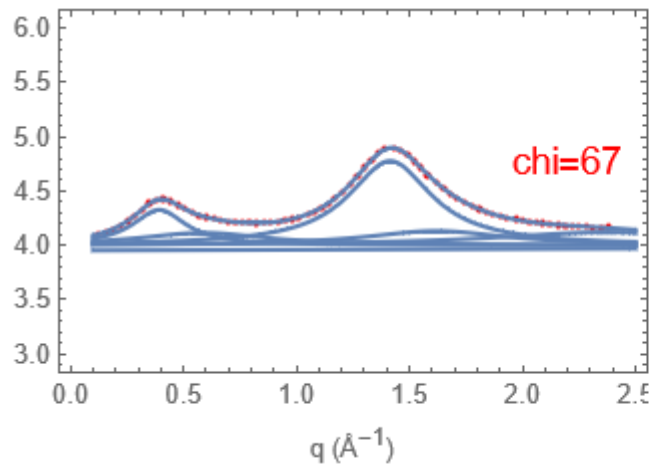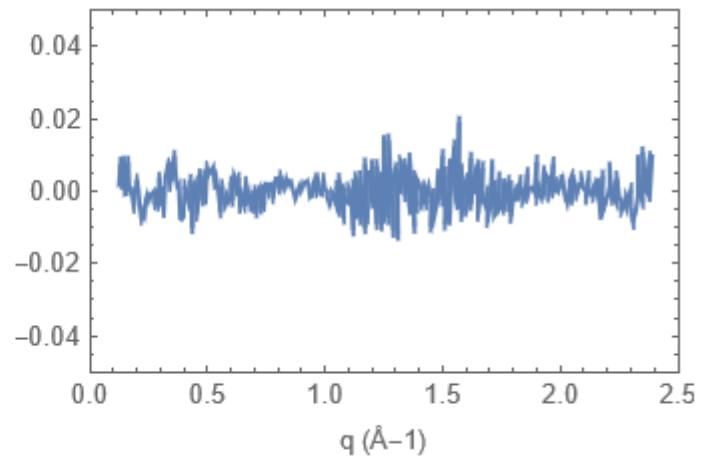

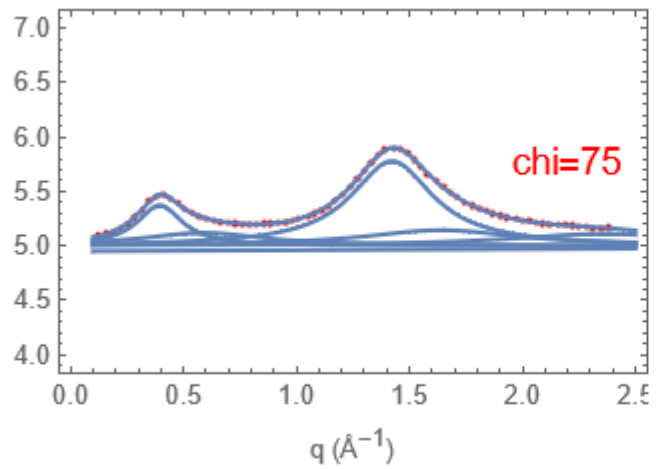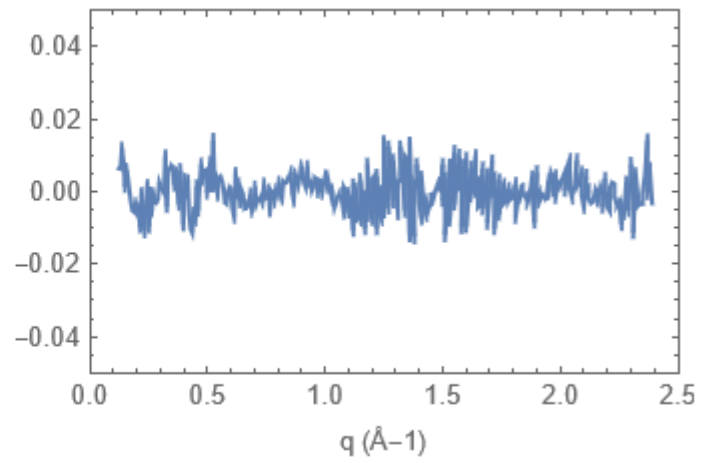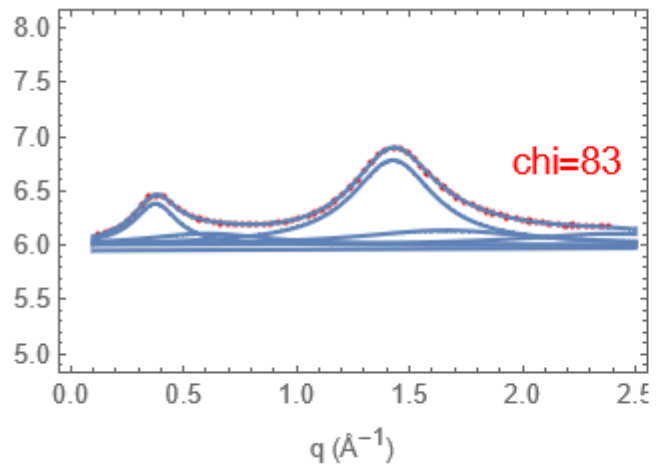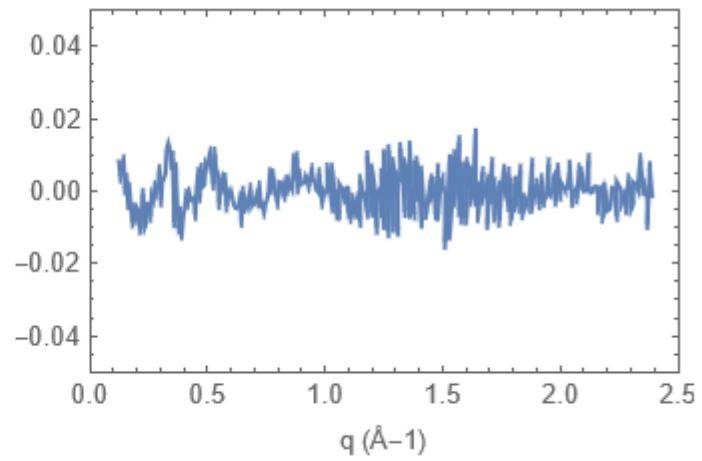

## T8AC2A

Table S.16: Local Structure Peaks for T8A C2A

|         | T8AC2A                  |                         |
|---------|-------------------------|-------------------------|
|         | q ( $\text{\AA}^{-1}$ ) | w ( $\text{\AA}^{-1}$ ) |
| chi=0   | 0.486889                | 0.197301                |
| chi=33  | 0.449738                | 0.22663                 |
| chi=50  | 0.444811                | 0.186806                |
| chi=67  | 0.442315                | 0.135178                |
| chi=75  | 0.454312                | 0.127713                |
| chi=83  | 0.466625                | 0.135289                |
| chi=100 | 0.914855                | 0.333708                |

Table S.17: Fitting Parameters for T8A C2A

| a    | b        | q01     | w1    | A1      | q02     | w2    | A2       | q03  | w3    | A3      | q04  | w4    | A4      | q05  | w5    | A5      |
|------|----------|---------|-------|---------|---------|-------|----------|------|-------|---------|------|-------|---------|------|-------|---------|
| 1.03 | 0.00578  | 0.487   | 0.197 | 0.00348 | 1.3     | 0.283 | 0.0194   | 1.42 | 0.21  | 0.0273  | 1.7  | 0.371 | 0.00438 | 2.4  | 0.373 | 0.00533 |
| 1.97 | 0.00956  | 0.45    | 0.227 | 0.00914 | 0.113   | 0.11  | 0.000961 | 1.37 | 0.39  | 0.0607  | 1.42 | 0.198 | 0.0207  | 2.17 | 0.399 | 0.0104  |
| 2.99 | -0.00839 | 0.445   | 0.187 | 0.00761 | 0.00115 | 0.128 | 0.00339  | 1.36 | 0.426 | 0.0589  | 1.43 | 0.206 | 0.0257  | 2.34 | 0.497 | 0.0301  |
| 4.05 | -0.00996 | 0.442   | 0.135 | 0.00545 | 0.447   | 0.5   | 0.00792  | 1.09 | 0.233 | 0.00338 | 1.45 | 0.232 | 0.0444  | 2.06 | 0.5   | 0.0203  |
| 4.99 | 0.01     | 0.454   | 0.128 | 0.00698 | 1.21    | 0.481 | 0.0421   | 1.45 | 0.191 | 0.0231  | 1.57 | 0.153 | 0.00267 | 1.9  | 0.5   | 0.0292  |
| 6.01 | 0.00951  | 0.467   | 0.135 | 0.00662 | 1.11    | 0.5   | 0.0295   | 1.68 | 0.377 | 0.00867 | 1.48 | 0.219 | 0.0358  | 2.21 | 0.494 | 0.0242  |
| 7.05 | 0.00975  | 0.00404 | 0.222 | 0.00191 | 0.915   | 0.334 | 0.0246   | 1.65 | 0.347 | 0.0457  | 2.47 | 0.499 | 0.0434  | 1.51 | 0.227 | 0.0214  |



Figure S.15: Fitting functions (blue) and raw data (red, 1/5th of points shown) for T8A C2A

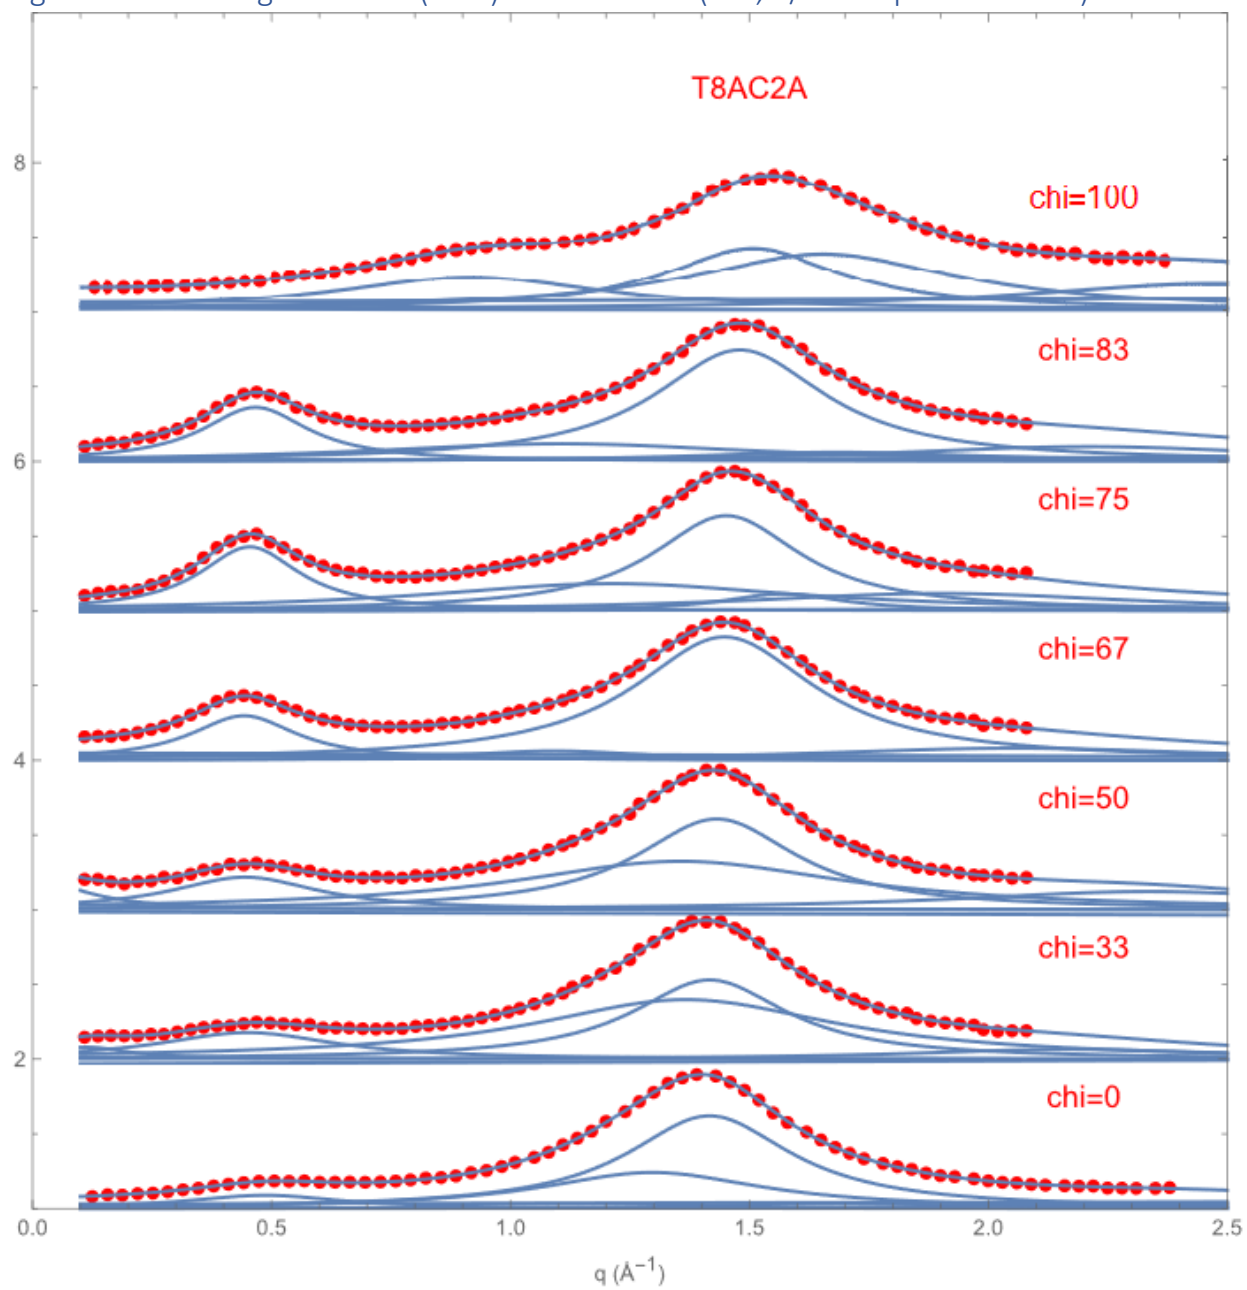

Figure S.16: Fitting functions and residuals for T8A C2A

Fitted Function

Residuals

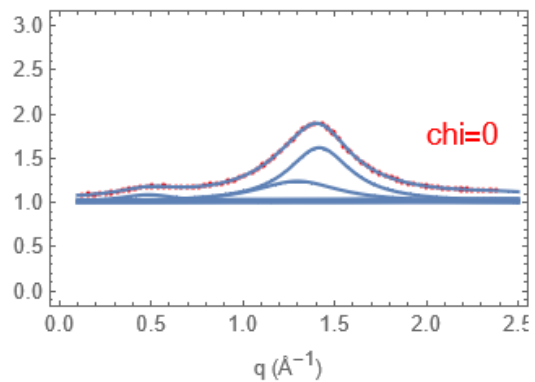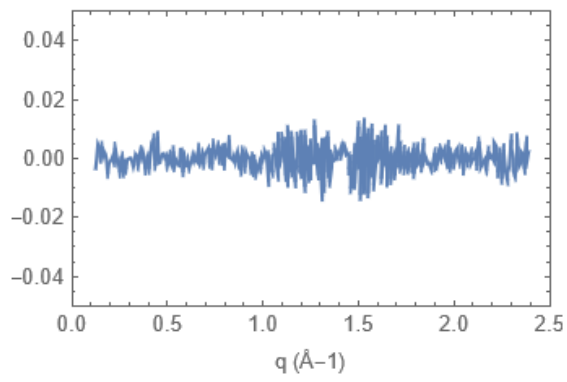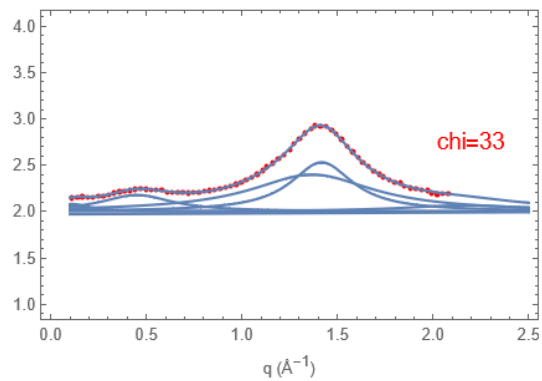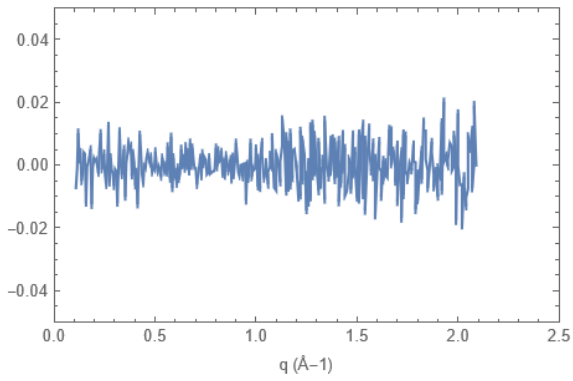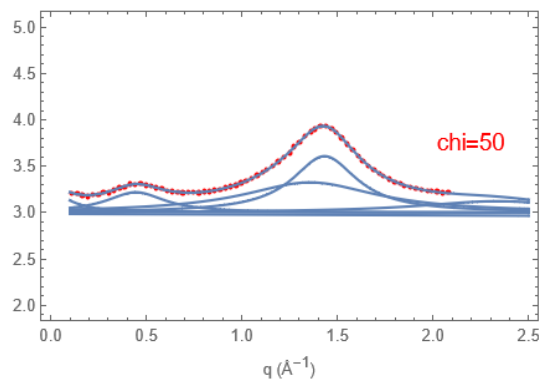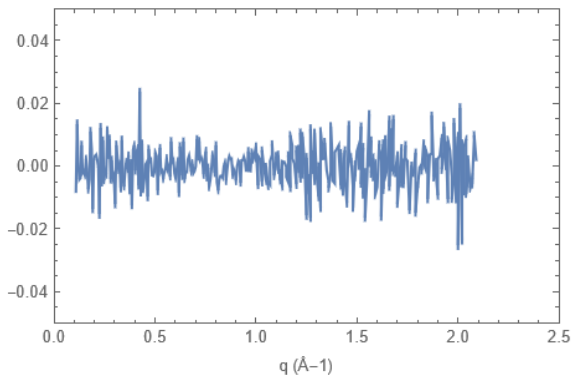

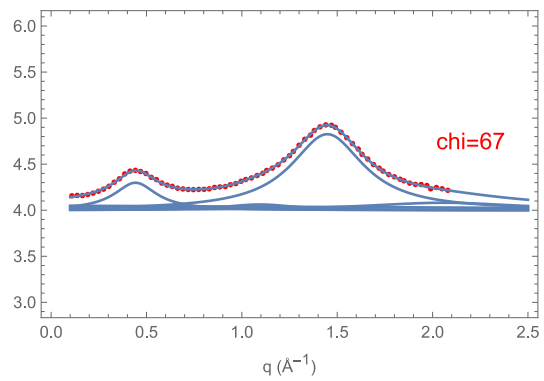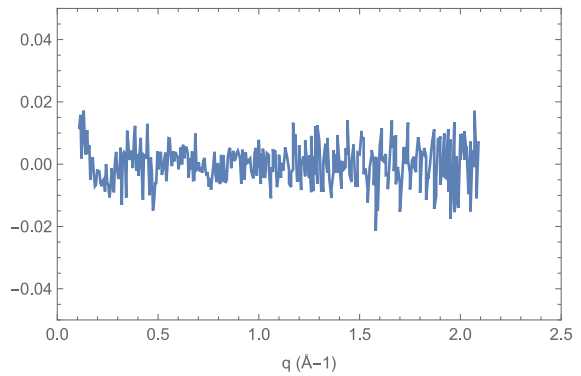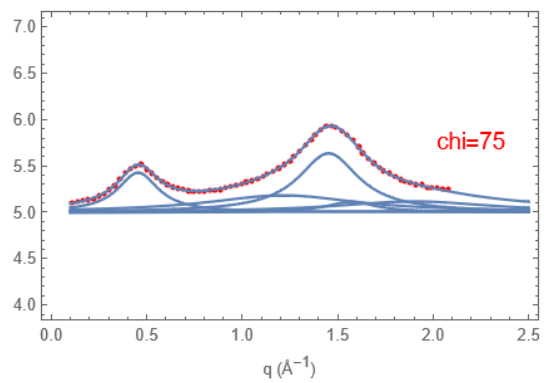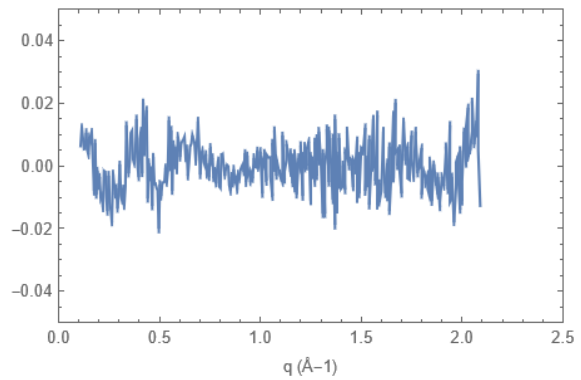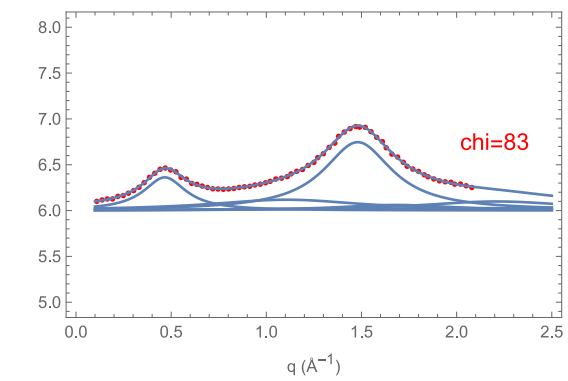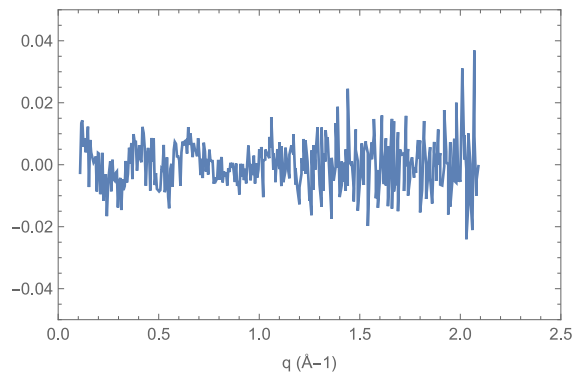

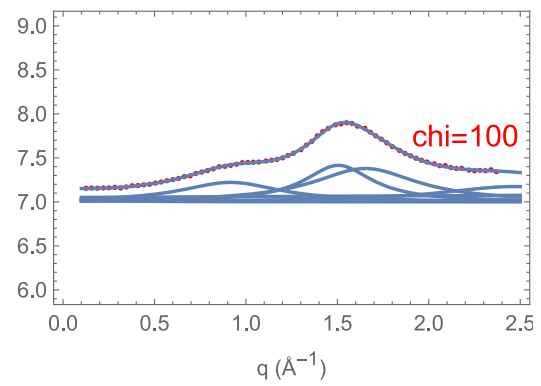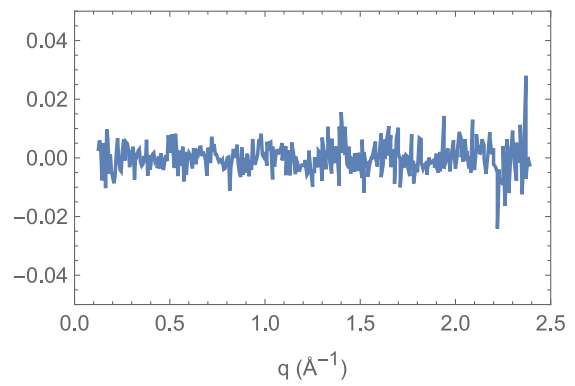

T8AC6A

Table S.18: Local Structure Peaks for T8A C6A

| T8AC6A  |                      |                      |
|---------|----------------------|----------------------|
|         | q (Å <sup>-1</sup> ) | w (Å <sup>-1</sup> ) |
| chi=0   |                      |                      |
| chi=33  | 0.468542             | 0.175375             |
| chi=50  | 0.454399             | 0.194357             |
| chi=67  | 0.431406             | 0.13934              |
| chi=75  | 0.431947             | 0.121119             |
| chi=83  | 0.423076             | 0.082743             |
| chi=100 | 0.476237             | 0.194581             |

Table S.19: Fitting Parameters for T8A C6A

| a    | b        | q <sub>01</sub> | w <sub>1</sub> | A <sub>1</sub> | q <sub>02</sub> | w <sub>2</sub> | A <sub>2</sub> | q <sub>03</sub> | w <sub>3</sub> | A <sub>3</sub> | q <sub>04</sub> | w <sub>4</sub> | A <sub>4</sub> | q <sub>05</sub> | w <sub>5</sub> | A <sub>5</sub> |
|------|----------|-----------------|----------------|----------------|-----------------|----------------|----------------|-----------------|----------------|----------------|-----------------|----------------|----------------|-----------------|----------------|----------------|
|      |          |                 |                | 0.0034         |                 |                |                |                 |                | 0.027          |                 |                |                |                 |                |                |
| 1.03 | 0.00578  | 0.487           | 0.197          | 8              | 1.3             | 0.283          | 0.0194         | 1.42            | 0.21           | 3              | 1.7             | 0.371          | 0.00438        | 2.4             | 0.373          | 0.00533        |
|      |          |                 |                | 0.0034         |                 |                | 0.0061         |                 | 0.21           | 0.033          |                 |                |                |                 |                |                |
| 2.05 | 0.00773  | 0.469           | 0.175          | 3              | 1.23            | 0.228          | 1              | 1.42            | 5              | 3              | 1.6             | 0.367          | 0.00565        | 2.47            | 0.362          | 0.00349        |
|      |          |                 |                | 0.0058         |                 |                | 0.0056         |                 | 0.28           | 0.051          |                 |                | 0.00030        |                 |                |                |
| 3.01 | 0.0083   | 0.454           | 0.194          | 4              | 1.43            | 0.158          | 1              | 1.39            | 4              | 7              | 0.138           | 0.103          | 9              | 2.4             | 0.485          | 0.0126         |
|      |          |                 |                | 0.0065         |                 |                | 0.0053         |                 | 0.28           | 0.050          |                 | 0.088          |                |                 |                |                |
| 4.02 | 0.00998  | 0.431           | 0.139          | 9              | 1.44            | 0.16           | 6              | 1.42            | 2              | 9              | 0.11            | 6              | 0.00023        | 2.34            | 0.5            | 0.0145         |
|      |          |                 |                | 0.0057         |                 |                |                |                 |                | 0.019          |                 |                |                |                 |                |                |
| 5.04 | 0.00998  | 0.432           | 0.121          | 5              | 1.44            | 0.217          | 0.035          | 1.56            | 0.5            | 1              | 1.2             | 0.185          | 0.00168        | 2.5             | 0.499          | 0.0119         |
|      |          |                 |                |                |                 |                |                |                 |                | 0.043          |                 |                |                |                 |                |                |
| 5.99 | 0.00994  | 0.423           | 0.0827         | 0.0035         | 1.45            | 0.219          | 0.034          | 1.44            | 0.53           | 2              | 0.49            | 0.137          | 0.00223        | 2.41            | 0.6            | 0.0286         |
|      |          |                 |                | 0.0098         |                 |                |                |                 | 0.49           |                |                 |                |                |                 |                |                |
| 7.02 | -0.00955 | 0.644           | 0.247          | 6              | 1.43            | 0.257          | 0.0891         | 1.76            | 5              | 0.024          | 0.476           | 0.195          | 0.0121         | 2.41            | 0.499          | 0.0556         |

Figure S.17: Fitting functions (blue) and raw data (red, 1/5<sup>th</sup> of points shown) for T8A C6A

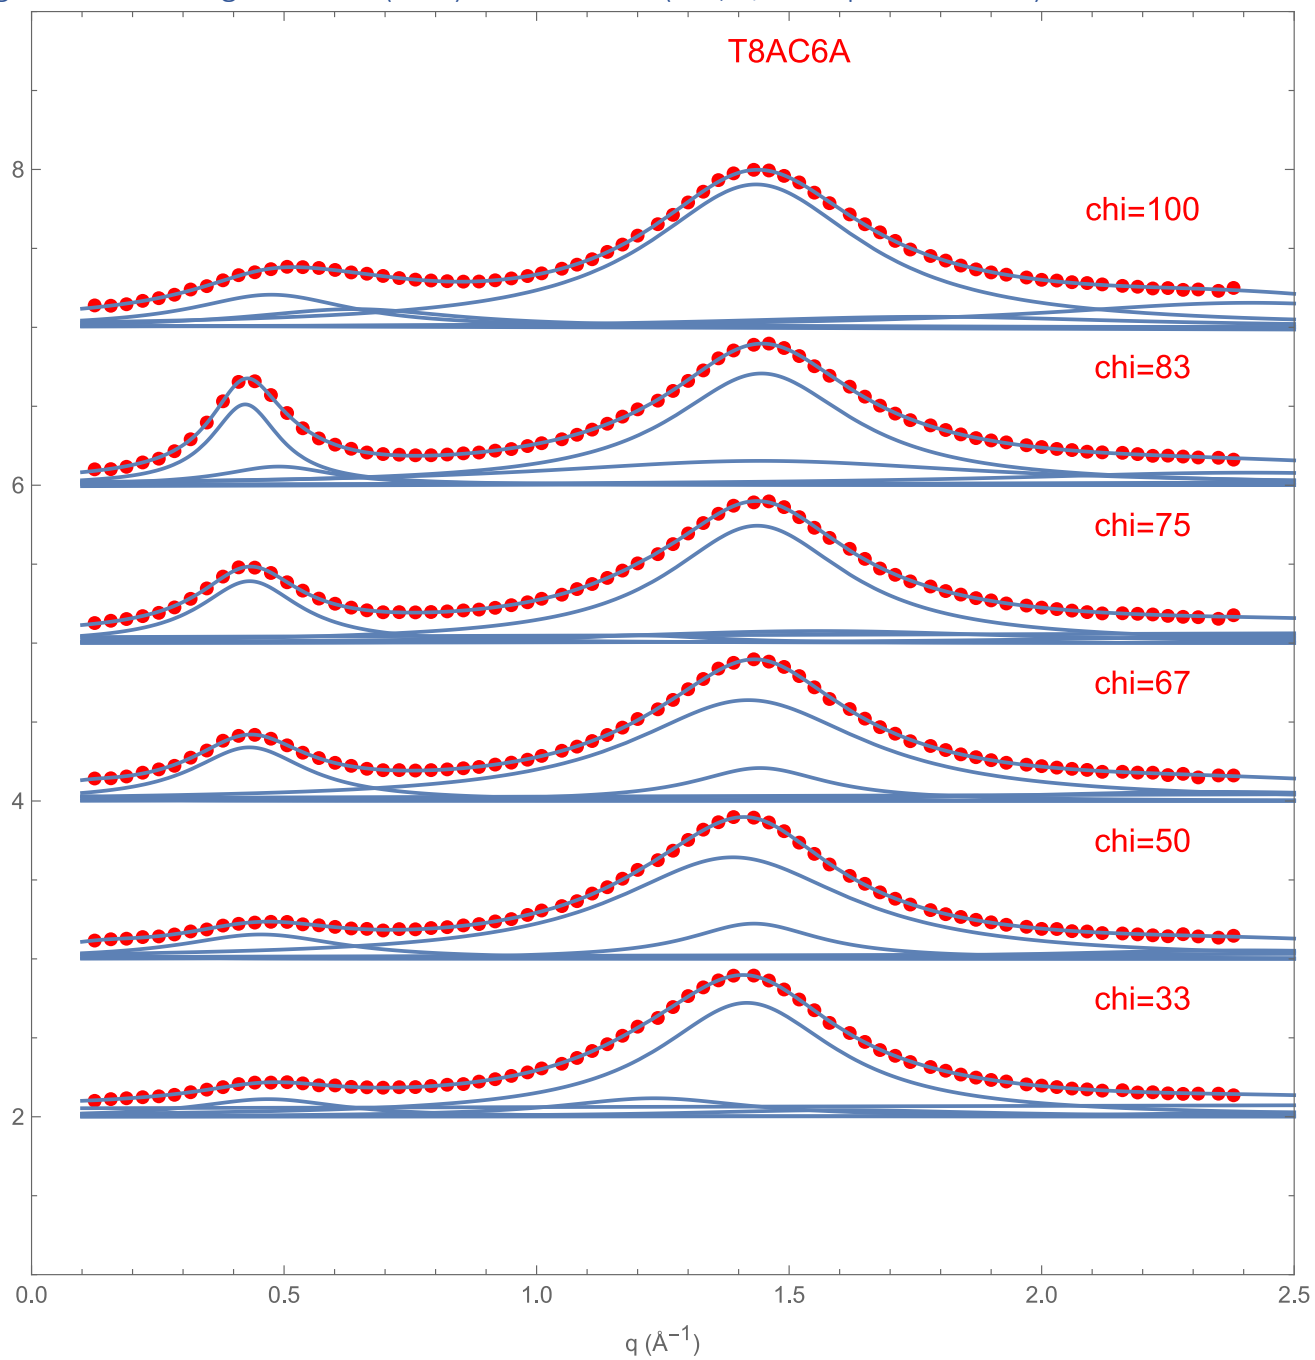

Figure S.18: Fitting functions and residuals for T8A C6A

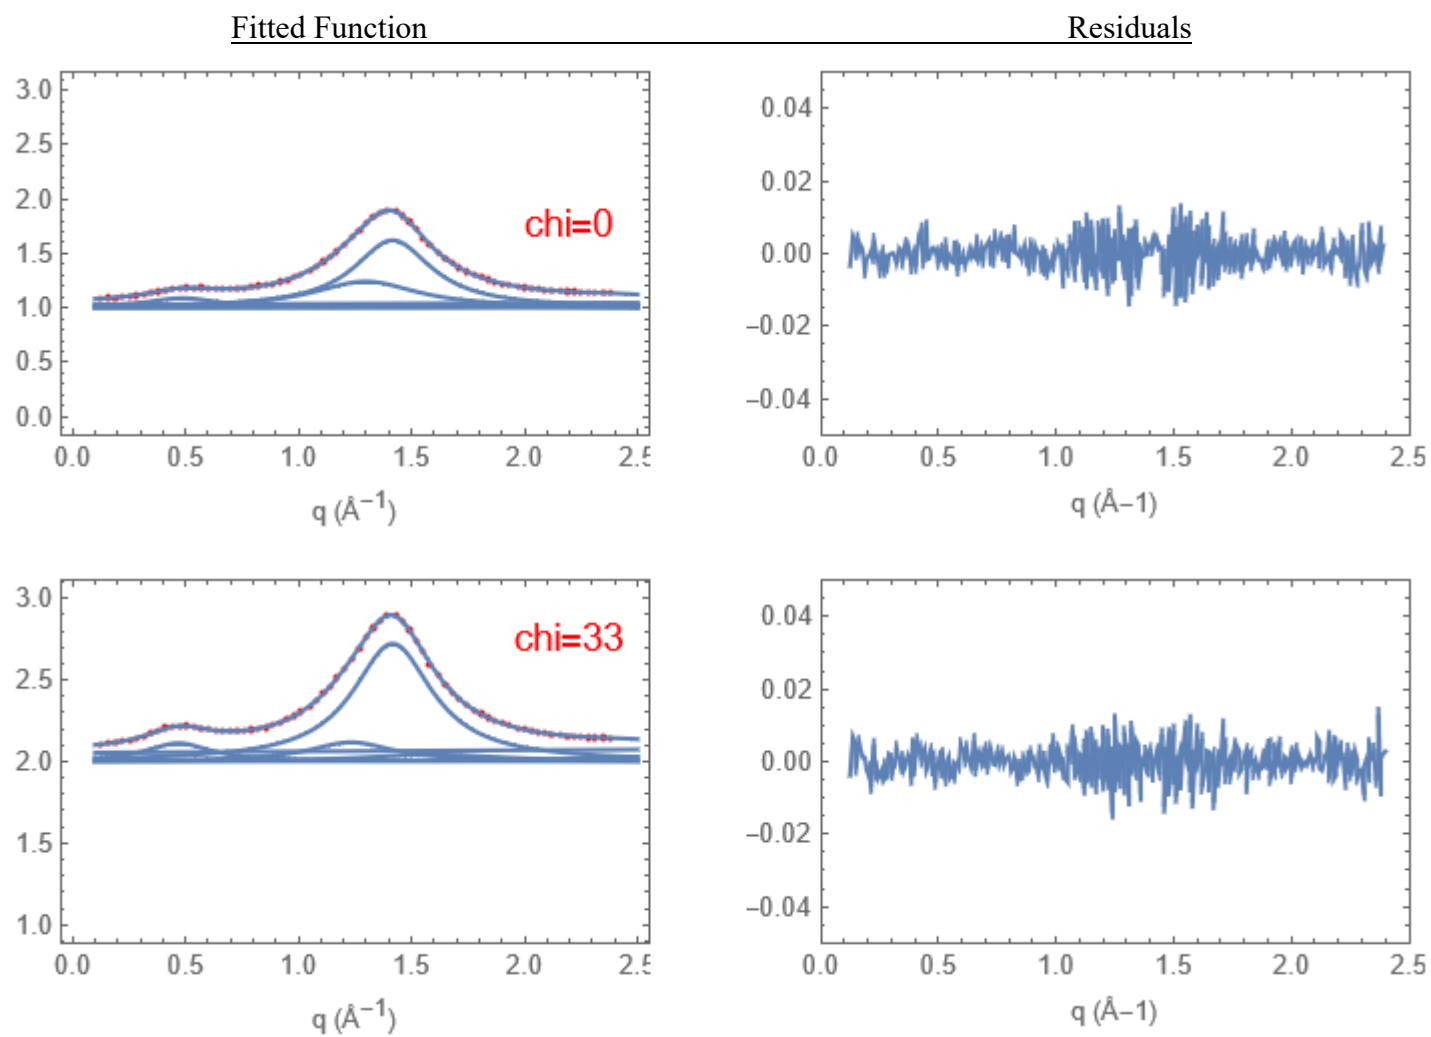

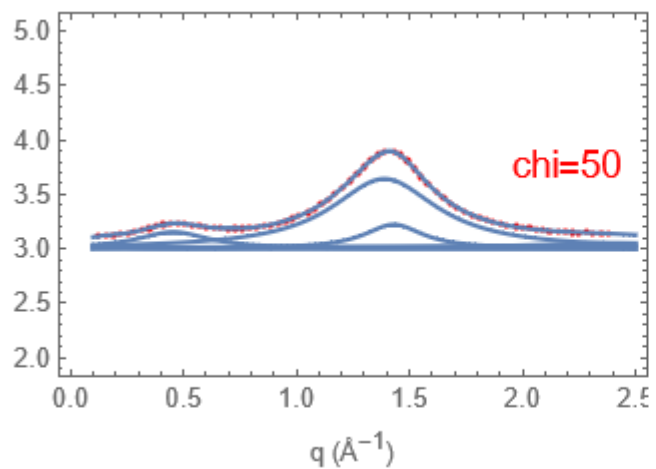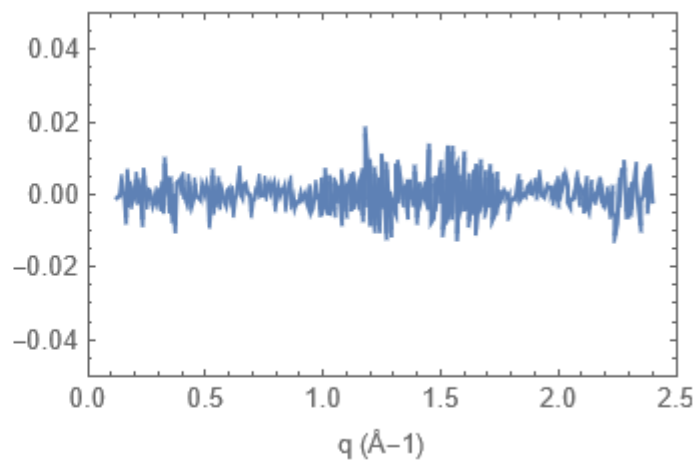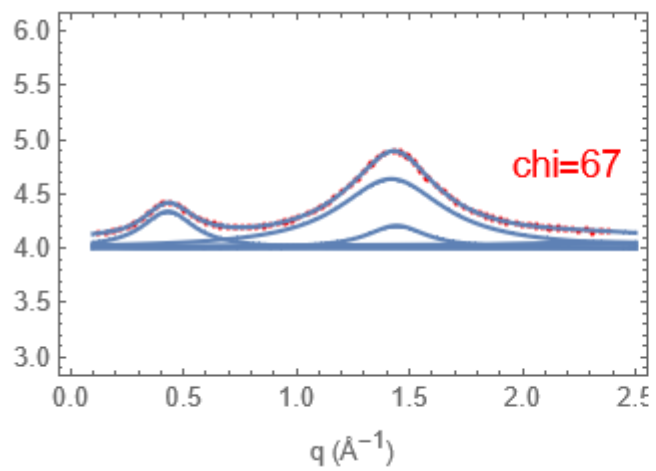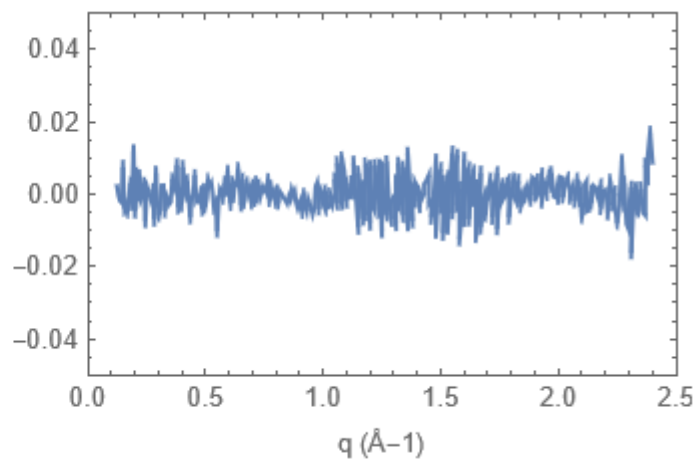



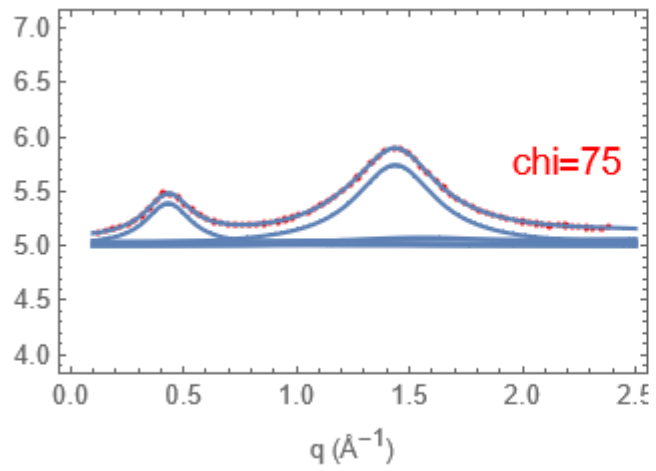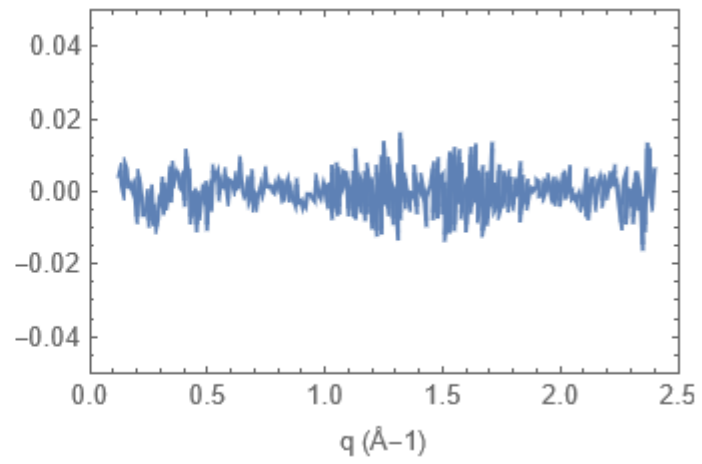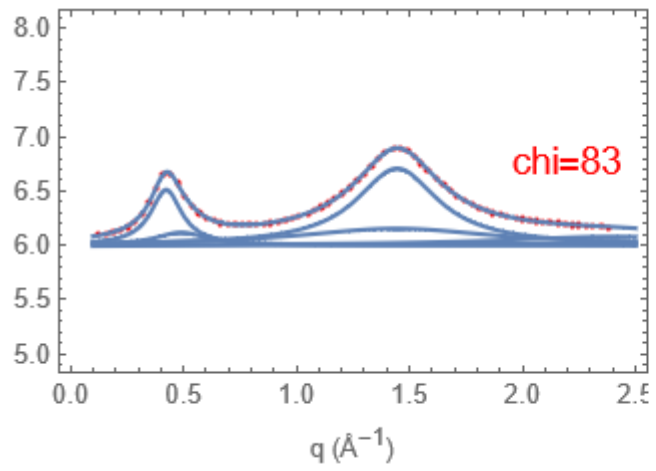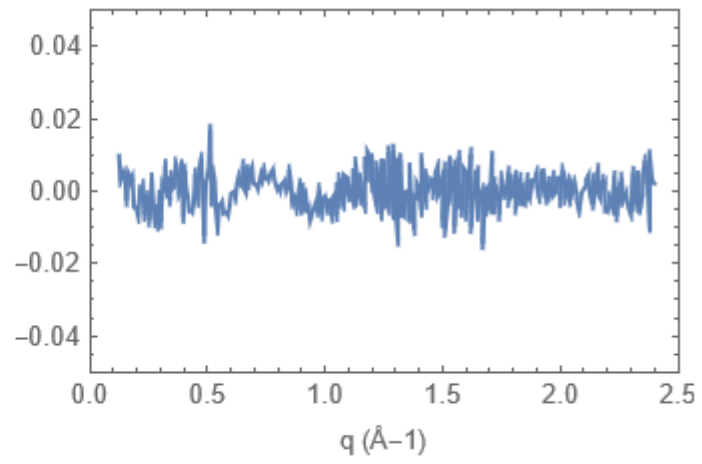

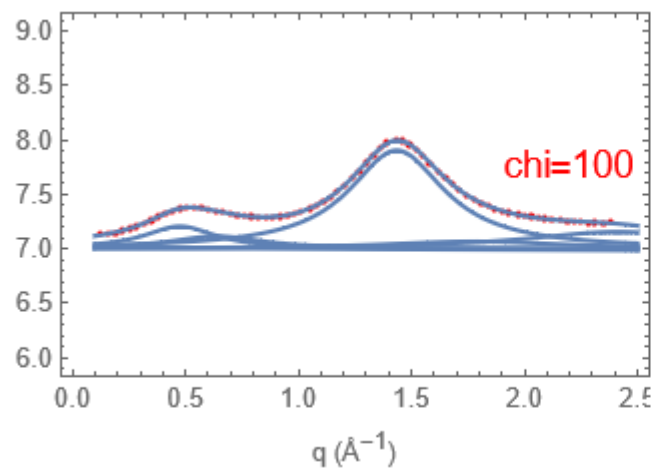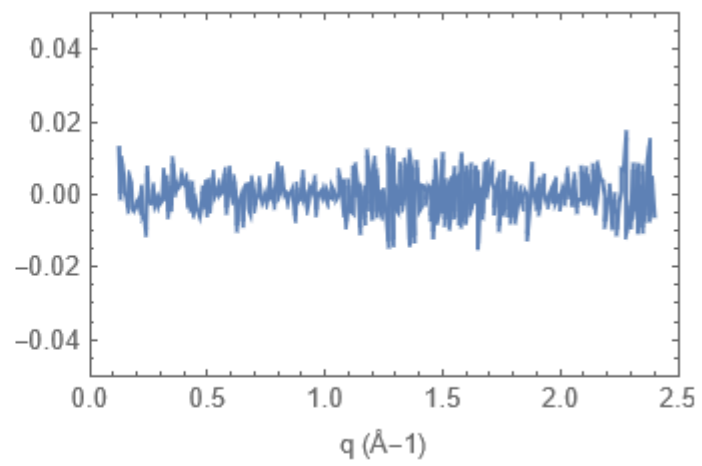

**T8AC8A**

Table S.20: Local Structure Peaks for T8A C8A

| T8AC8A  |                      |                      |
|---------|----------------------|----------------------|
|         | q (Å <sup>-1</sup> ) | w (Å <sup>-1</sup> ) |
| chi=0   |                      |                      |
| chi=33  | 0.44326              | 0.185372             |
| chi=50  | 0.418657             | 0.173421             |
| chi=67  | 0.409713             | 0.155974             |
| chi=75  | 0.408333             | 0.133122             |
| chi=83  | 0.400971             | 0.095243             |
| chi=100 | 0.415004             | 0.201146             |

Table S.21: Fitting Parameters for T8A C8A

| a    | b        | q <sub>01</sub> | w <sub>1</sub> | A <sub>1</sub> | q <sub>02</sub> | w <sub>2</sub> | A <sub>2</sub> | q <sub>03</sub> | w <sub>3</sub> | A <sub>3</sub> | q <sub>04</sub> | w <sub>4</sub> | A <sub>4</sub> | q <sub>05</sub> | w <sub>5</sub> | A <sub>5</sub> |
|------|----------|-----------------|----------------|----------------|-----------------|----------------|----------------|-----------------|----------------|----------------|-----------------|----------------|----------------|-----------------|----------------|----------------|
| 1.03 | 0.00578  | 0.487           | 0.197          | 0.00348        | 1.3             | 0.283          | 0.0194         | 1.42            | 0.21           | 0.0273         | 1.7             | 0.371          | 0.00438        | 2.4             | 0.373          | 0.00533        |
| 2.05 | -0.00756 | 0.443           | 0.185          | 0.00428        | 1.21            | 0.228          | 0.00424        | 1.41            | 0.214          | 0.0328         | 1.56            | 0.441          | 0.0183         | 2.42            | 0.459          | 0.0114         |
| 3.05 | -0.00999 | 0.419           | 0.173          | 0.00563        | 1.41            | 0.227          | 0.0413         | 1.72            | 0.392          | 0.0058         | 1.15            | 0.201          | 0.00169        | 2.41            | 0.499          | 0.016          |
| 4.05 | -0.00999 | 0.41            | 0.156          | 0.00592        | 1.41            | 0.222          | 0.0399         | 1.77            | 0.407          | 0.0057         | 1.13            | 0.191          | 0.00148        | 2.46            | 0.495          | 0.0168         |
| 5.03 | -0.00175 | 0.408           | 0.133          | 0.00571        | 1.42            | 0.216          | 0.0356         | 1.63            | 0.497          | 0.0207         | 1.16            | 0.243          | 0.00217        | 2.52            | 0.499          | 0.0168         |
| 5.96 | 0.00998  | 0.401           | 0.0952         | 0.00537        | 1.43            | 0.208          | 0.0313         | 1.53            | 0.5            | 0.0405         | 0.8             | 0.5            | 0.0113         | 2.4             | 0.5            | 0.0225         |
| 6.96 | 0.00943  | 0.415           | 0.201          | 0.0114         | 1.41            | 0.221          | 0.0418         | 1.64            | 0.452          | 0.0299         | 0.8             | 0.42           | 0.0114         | 2.45            | 0.499          | 0.0356         |

Figure S.19: Fitting functions (blue) and raw data (red, 1/5<sup>th</sup> of points shown) for T8A C8A

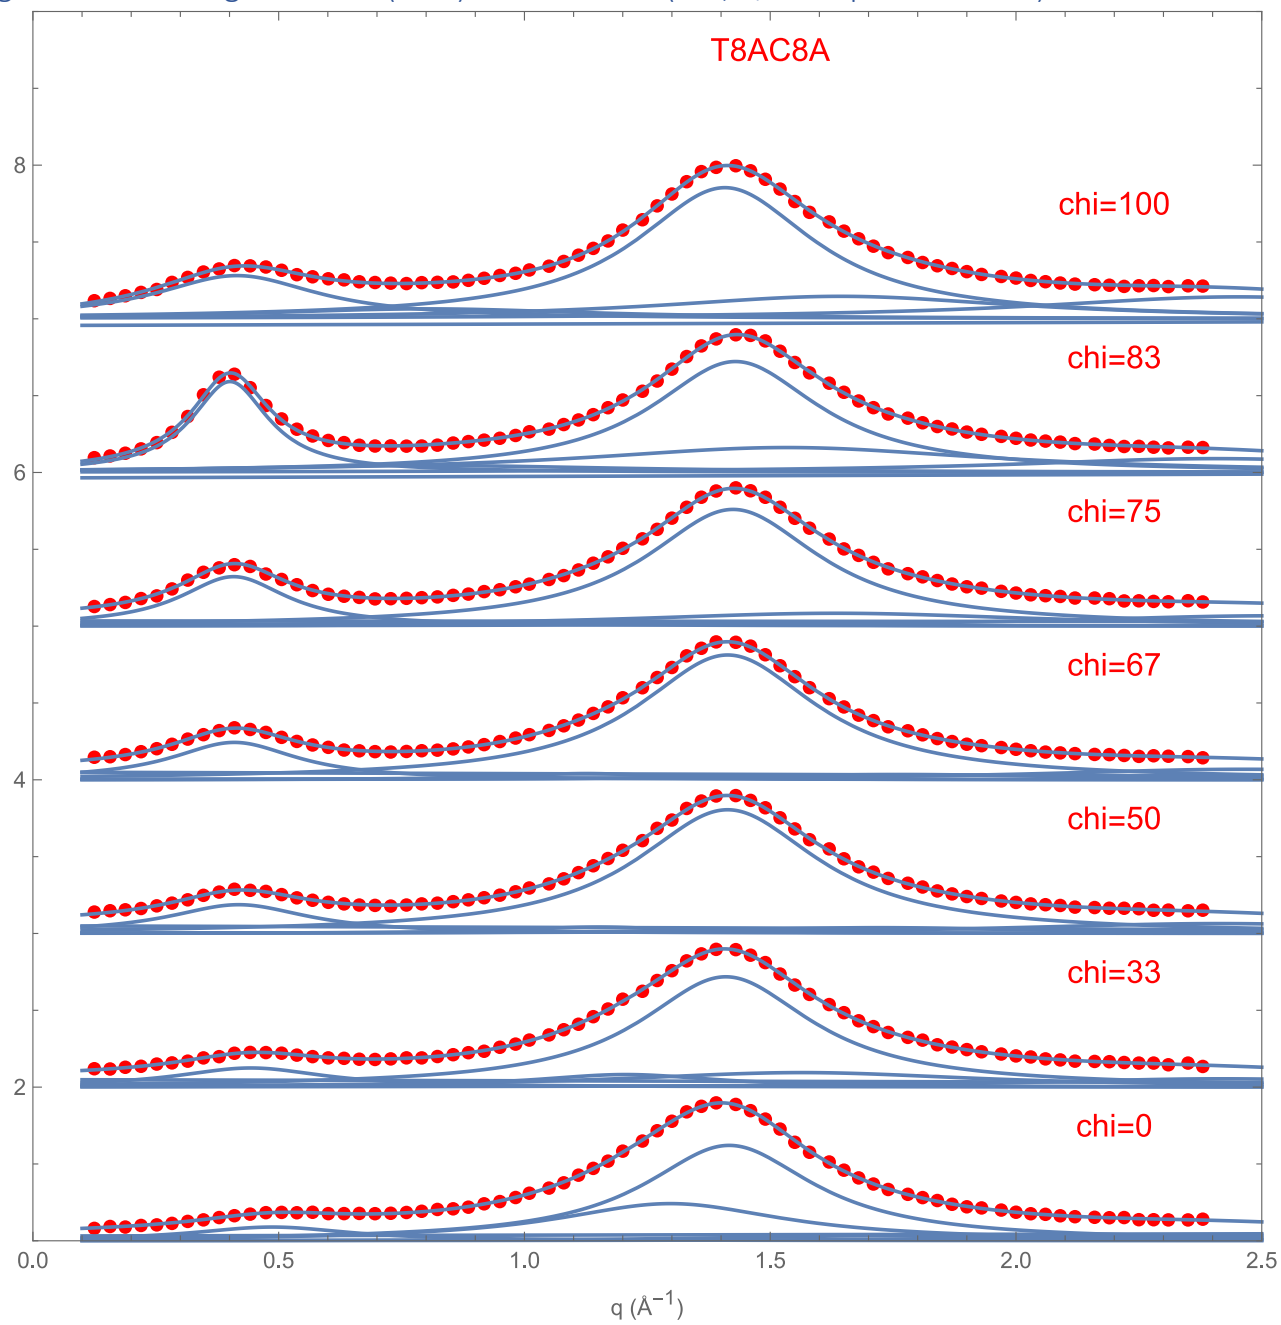

Figure S.20: Fitting functions and residuals for T8A C8A

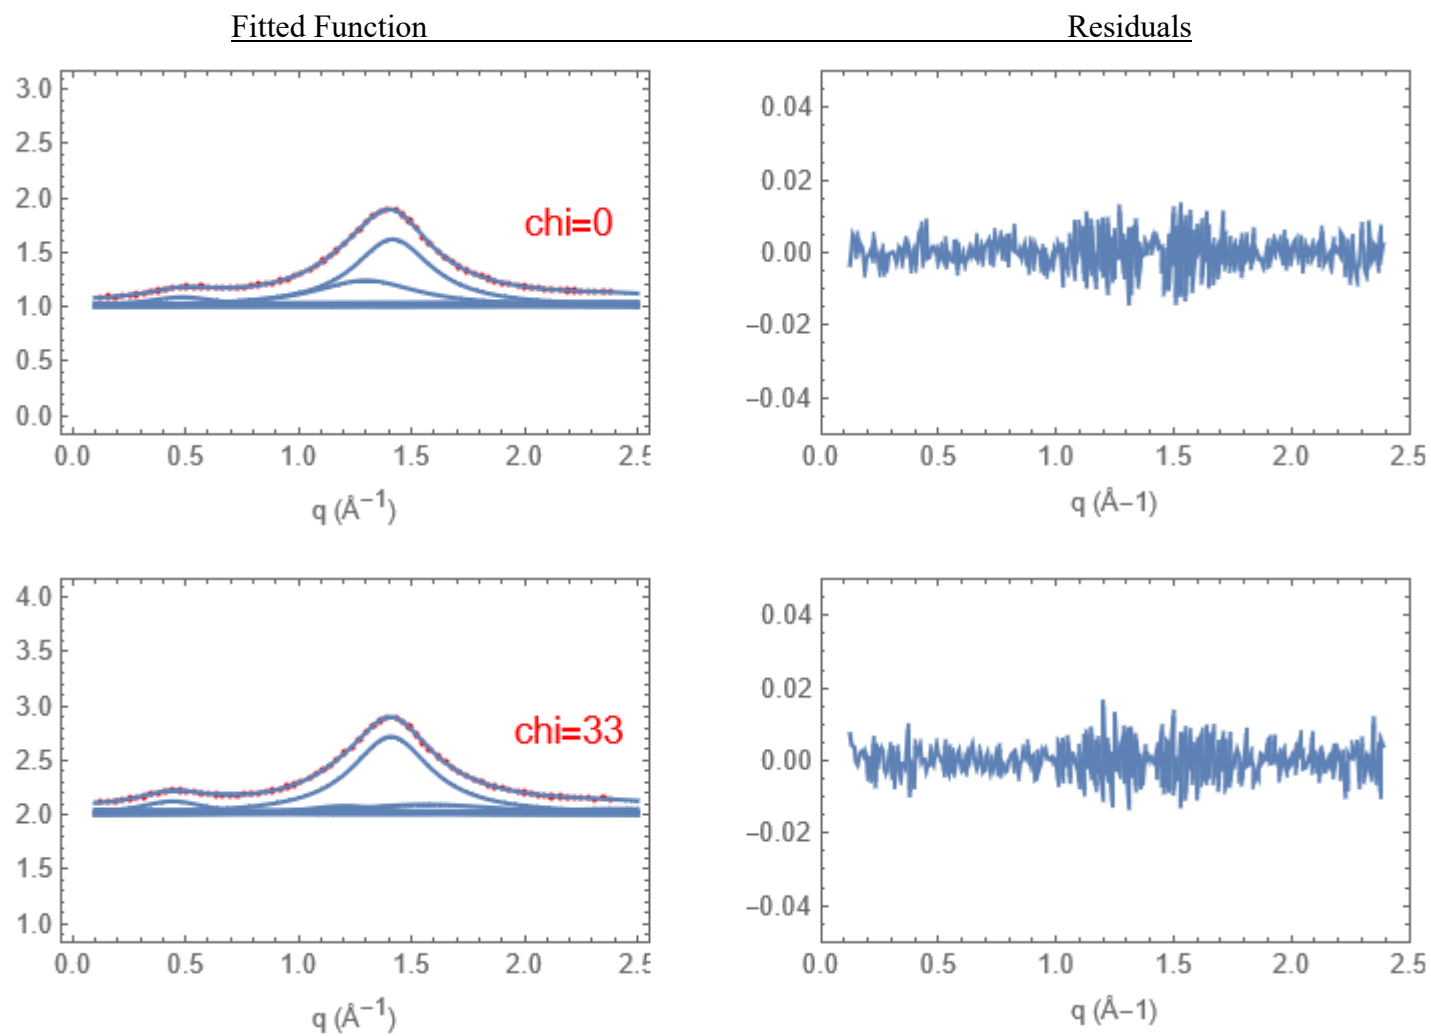

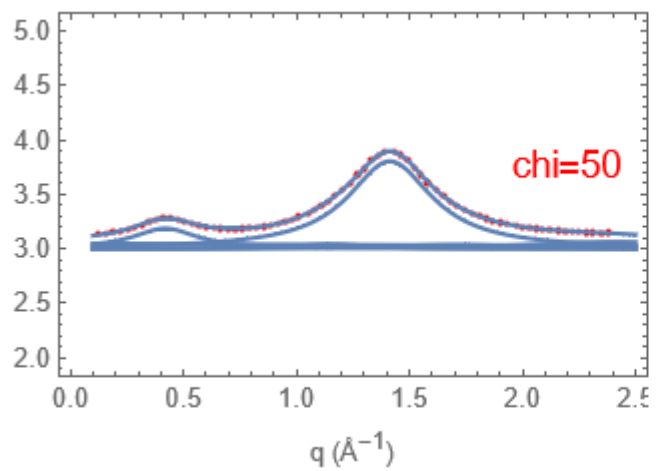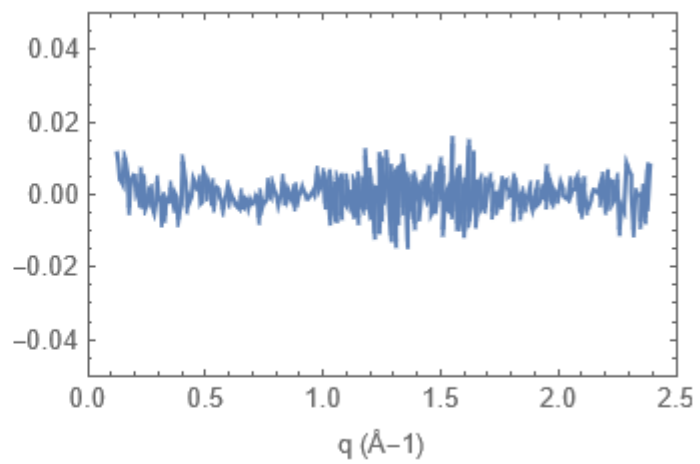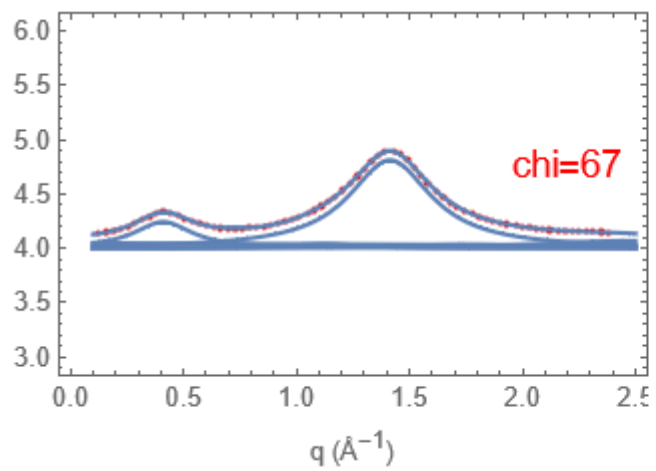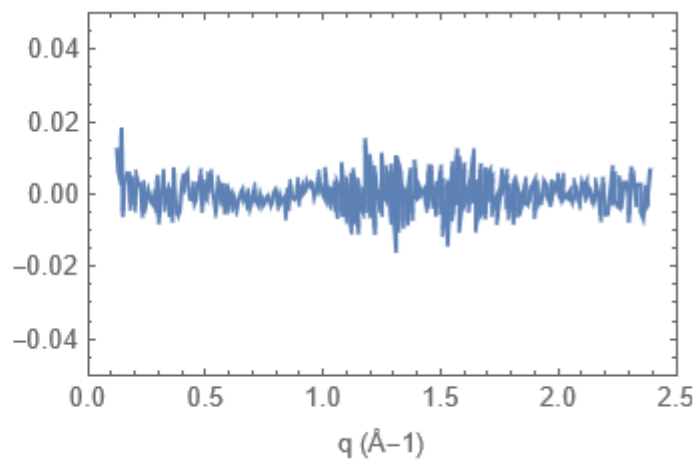

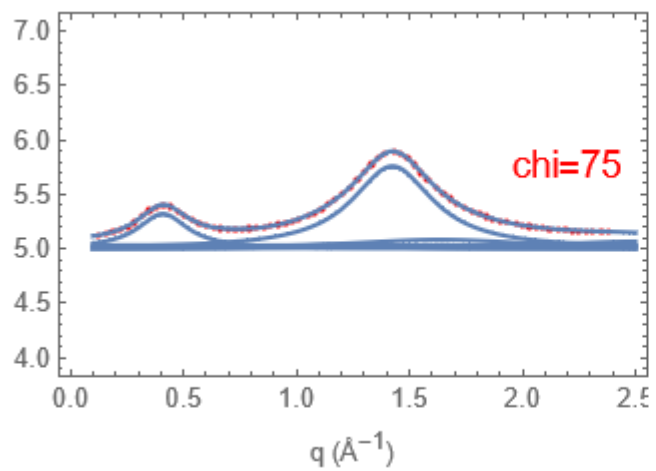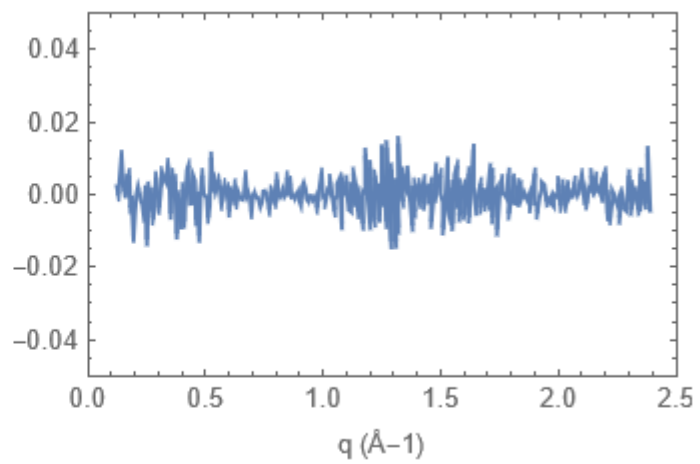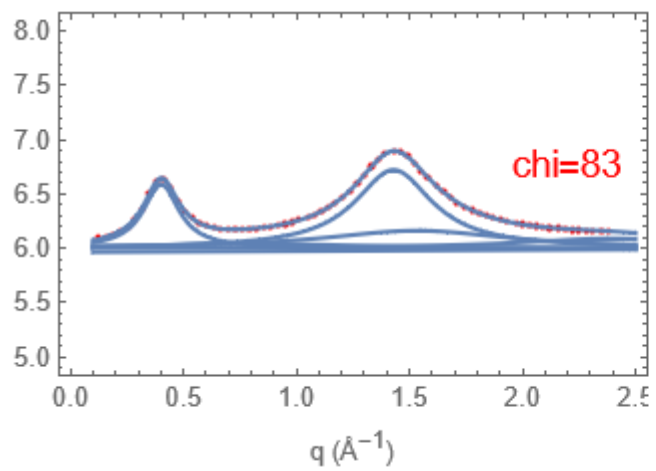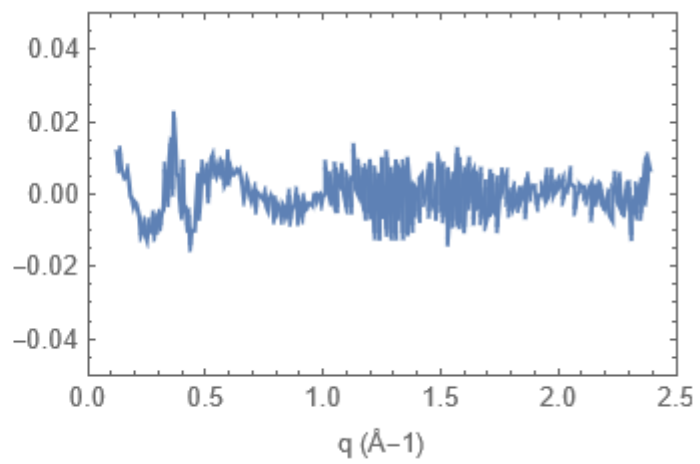

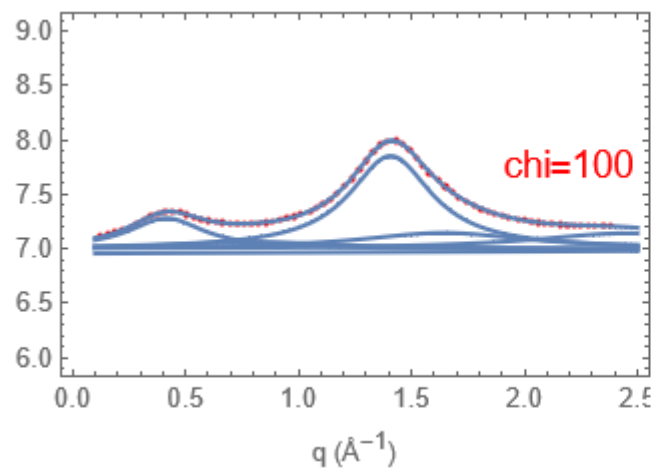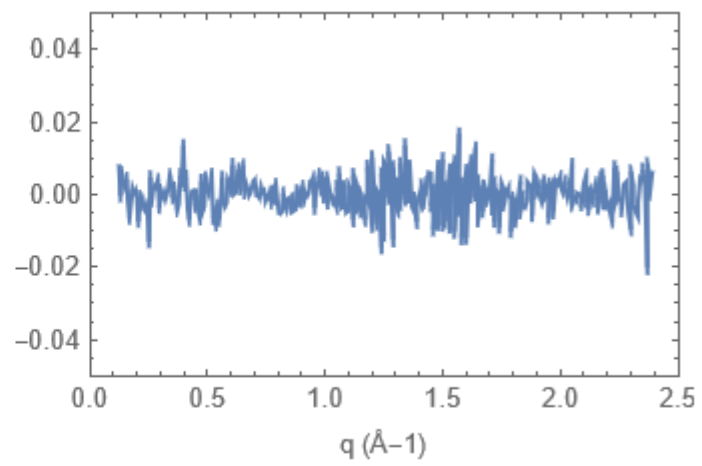





Figure S.21: Fitting functions (blue) and raw data (red, 1/5<sup>th</sup> of points shown) for T8A C10A

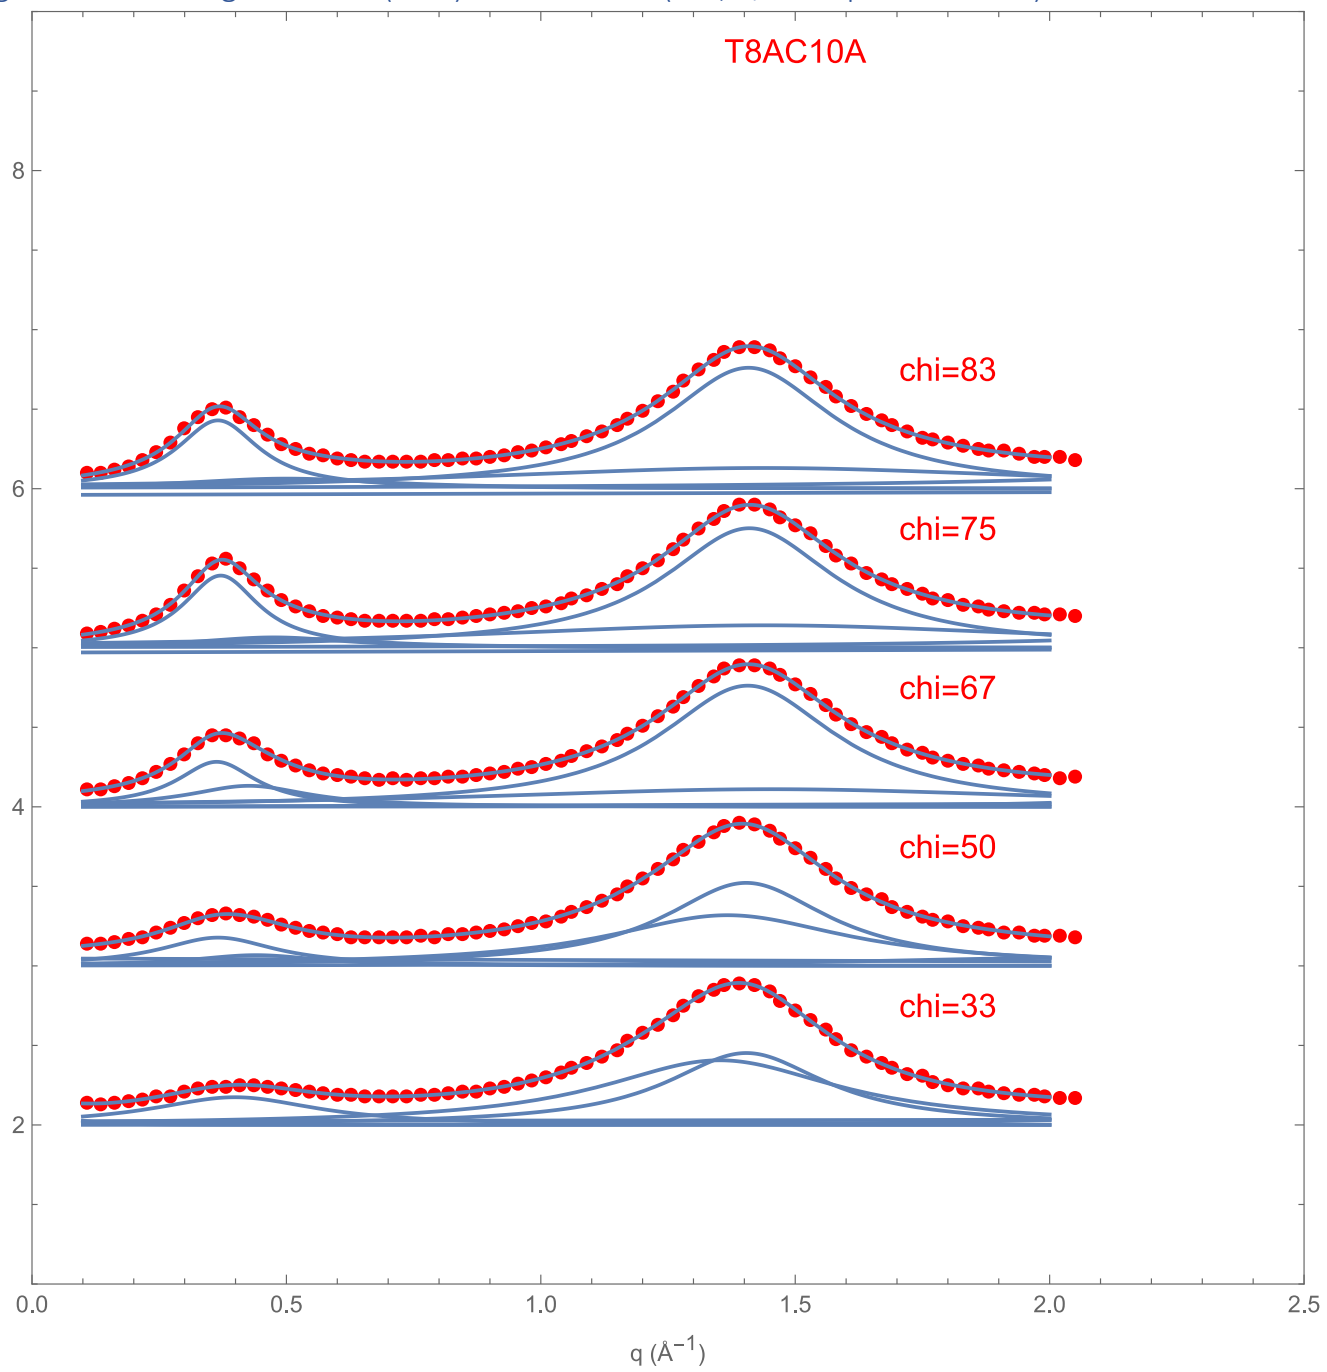

Figure S.22: Fitting functions and residuals for T8A C10A

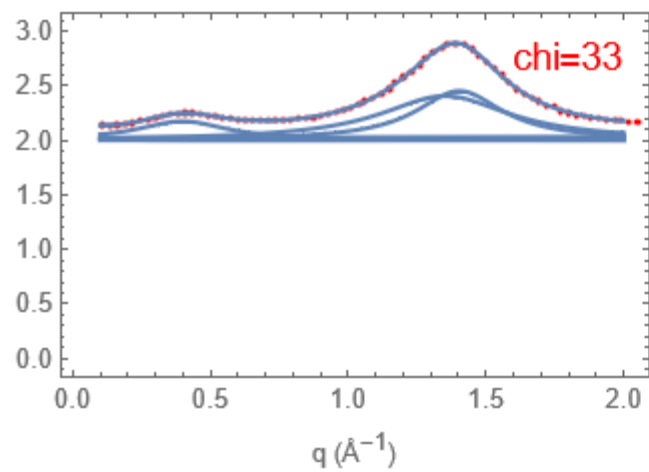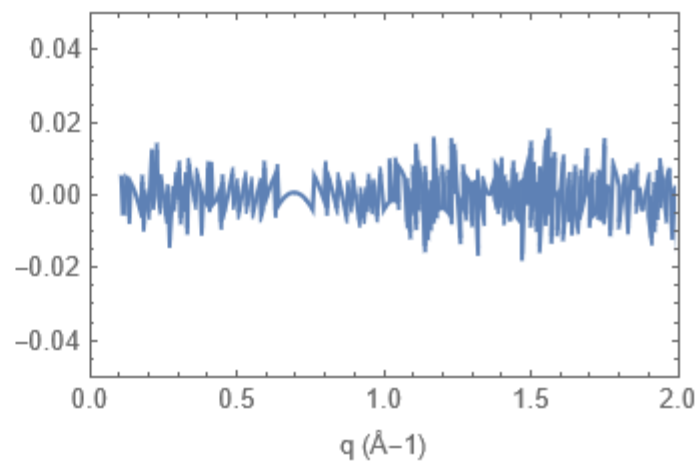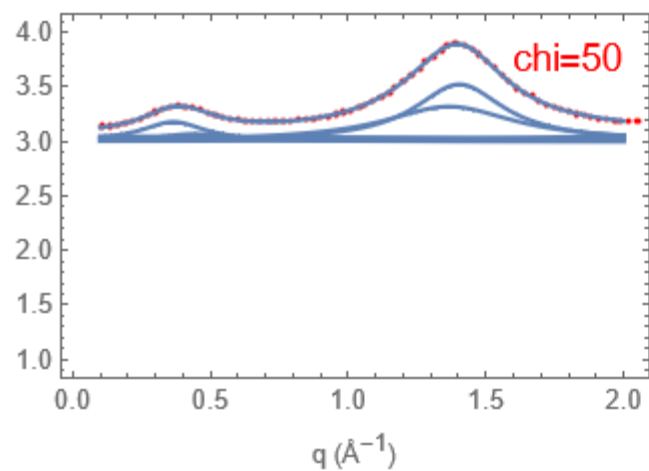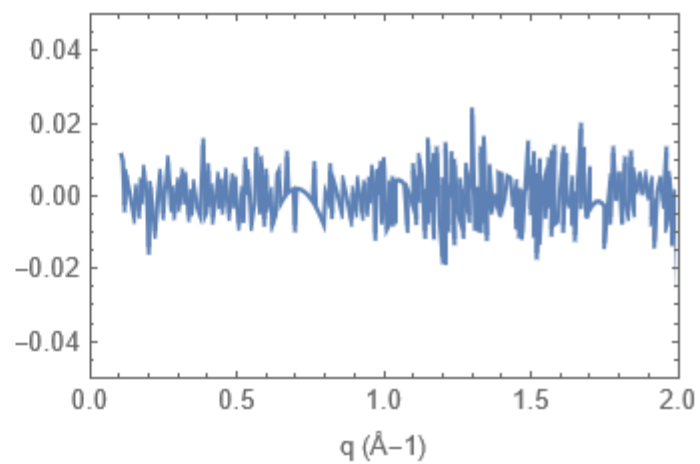

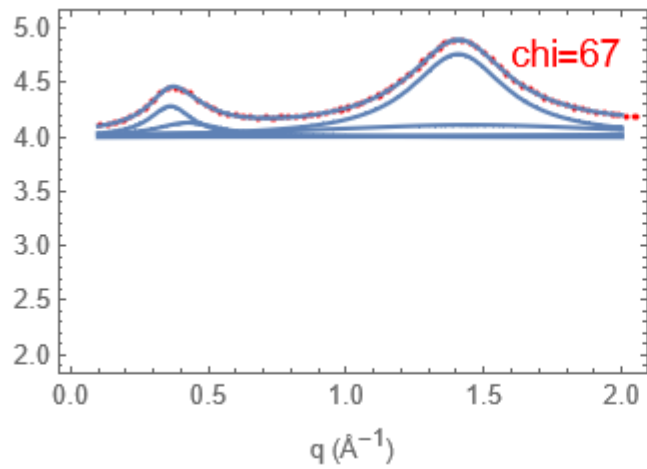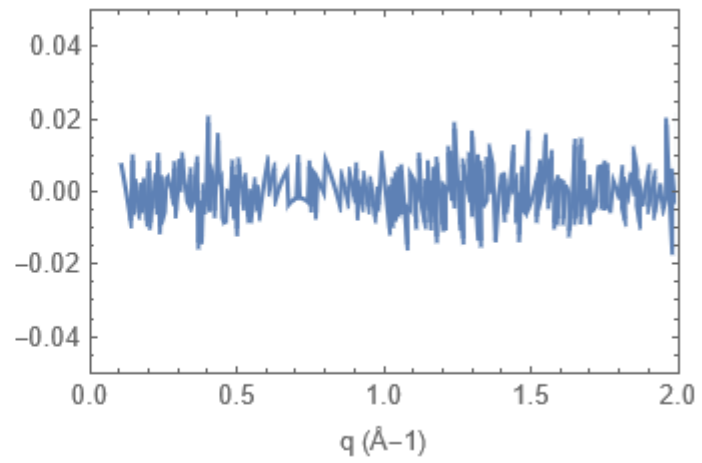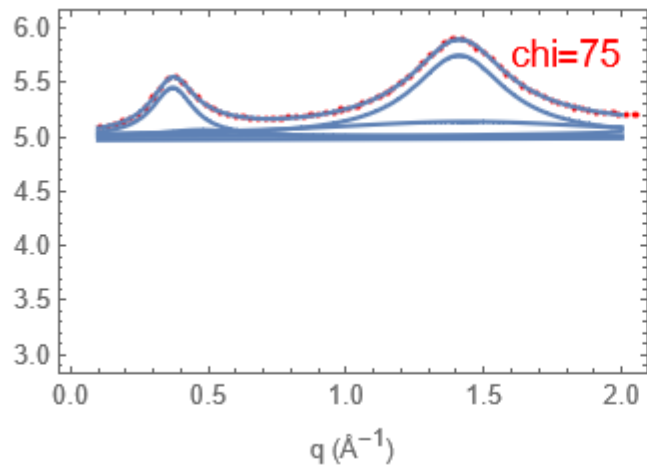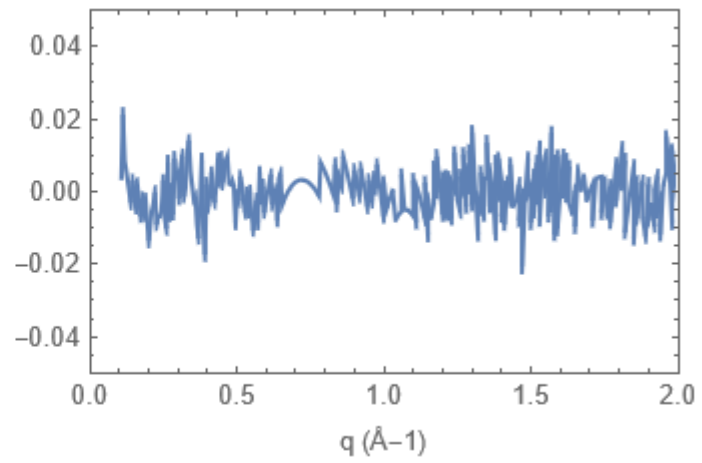

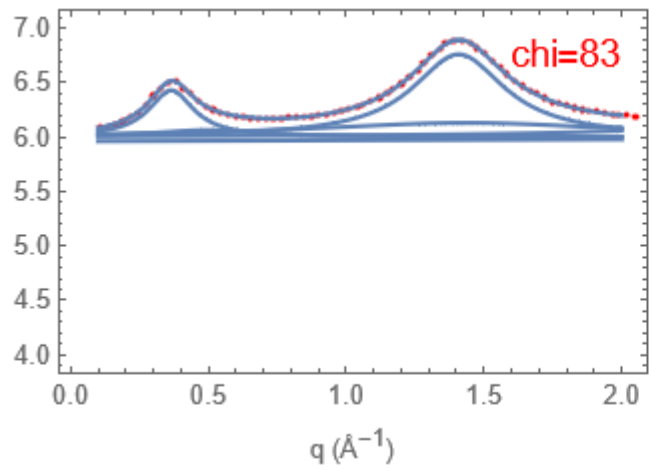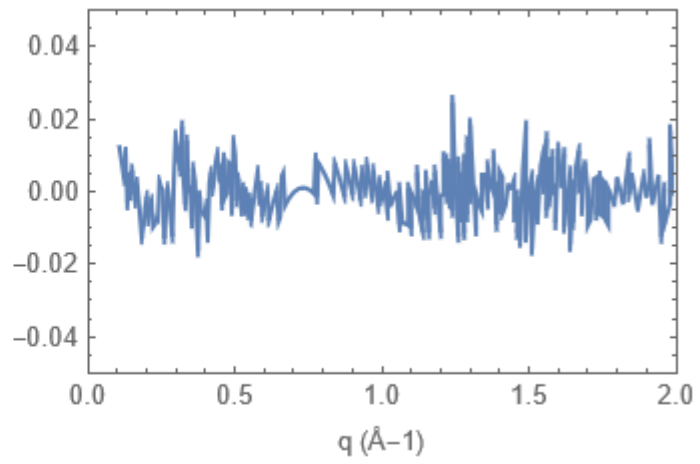

### S.3: Fitting Information for Mixtures Presented in Figure 5

#### D2A C6A

Table S.24: Local Structure Peaks for D2A C6A

| D2AC6A  |                      |                      |
|---------|----------------------|----------------------|
|         | q (Å <sup>-1</sup> ) | w (Å <sup>-1</sup> ) |
| chi=0   |                      |                      |
| chi=33  | 0.435191             | 0.183095             |
| chi=50  | 0.393032             | 0.12822              |
| chi=67  | 0.377885             | 0.122103             |
| chi=75  | 0.417971             | 0.122238             |
| chi=83  | 0.406208             | 0.131294             |
| chi=100 | 0.476237             | 0.194581             |

Table S.25: Fitting Parameters for D2A C6A

| a    | b            | q <sub>01</sub> | w <sub>1</sub> | A <sub>1</sub> | q <sub>02</sub> | w <sub>2</sub> | A <sub>2</sub> | q <sub>03</sub> | w <sub>3</sub> | A <sub>3</sub> | q <sub>04</sub> | w <sub>4</sub> | A <sub>4</sub> | q <sub>05</sub> | w <sub>5</sub> | A <sub>5</sub> |
|------|--------------|-----------------|----------------|----------------|-----------------|----------------|----------------|-----------------|----------------|----------------|-----------------|----------------|----------------|-----------------|----------------|----------------|
| 1.02 | 0.00603      | 0.12            | 0.253          | 0.0049<br>2    | 0.983           | 0.36           | 0.026          | 1.32            | 0.367          | 0.032<br>6     | 1.54            | 0.283          | 0.0568         | 2.38            | 0.384          | 0.0103         |
| 2    | 0.0331       | 0.435           | 0.183          | 0.0086<br>6    | 0.822           | 0.343          | 0.0231         | 1.53            | 0.312          | 0.039<br>7     | 1.49            | 0.399          | 0.059          | 2.35            | 0.501          | 0.0189         |
| 2.95 | 0.1          | 0.393           | 0.128          | 0.0056<br>9    | 0.745           | 0.357          | 0.0243         | 1.57            | 0.352          | 0.069          | 1.34            | 0.355          | 0.0266         | 1.94            | 0.457          | 0.0157         |
| 3.95 | 0.0999       | 0.378           | 0.122          | 0.0057<br>5    | 0.694           | 0.347          | 0.0209         | 1.33            | 0.343          | 0.020<br>5     | 1.51            | 0.318          | 0.0588         | 1.85            | 0.384          | 0.0118         |
| 4.95 | 0.0865       | 0.418           | 0.122          | 0.0052<br>9    | 0.669           | 0.377          | 0.0223         | 1.25            | 0.060<br>2     | 3.25E-<br>05   | 1.48            | 0.293          | 0.0666         | 1.97            | 0.353          | 0.0026<br>8    |
| 5.95 | 0.0876       | 0.659           | 0.35           | 0.0164         | 1.26            | 0.174          | 0.00081<br>9   | 1.48            | 0.283          | 0.061<br>4     | 0.406           | 0.131          | 0.0065<br>7    | 1.98            | 0.438          | 0.005          |
| 7.02 | -<br>0.00955 | 0.644           | 0.247          | 0.0098<br>6    | 1.43            | 0.257          | 0.0891         | 1.76            | 0.495          | 0.024          | 0.476           | 0.195          | 0.0121         | 2.41            | 0.499          | 0.0556         |

Figure S.23: Fitting functions (blue) and raw data (red, 1/5<sup>th</sup> of points shown) for D2A C6A

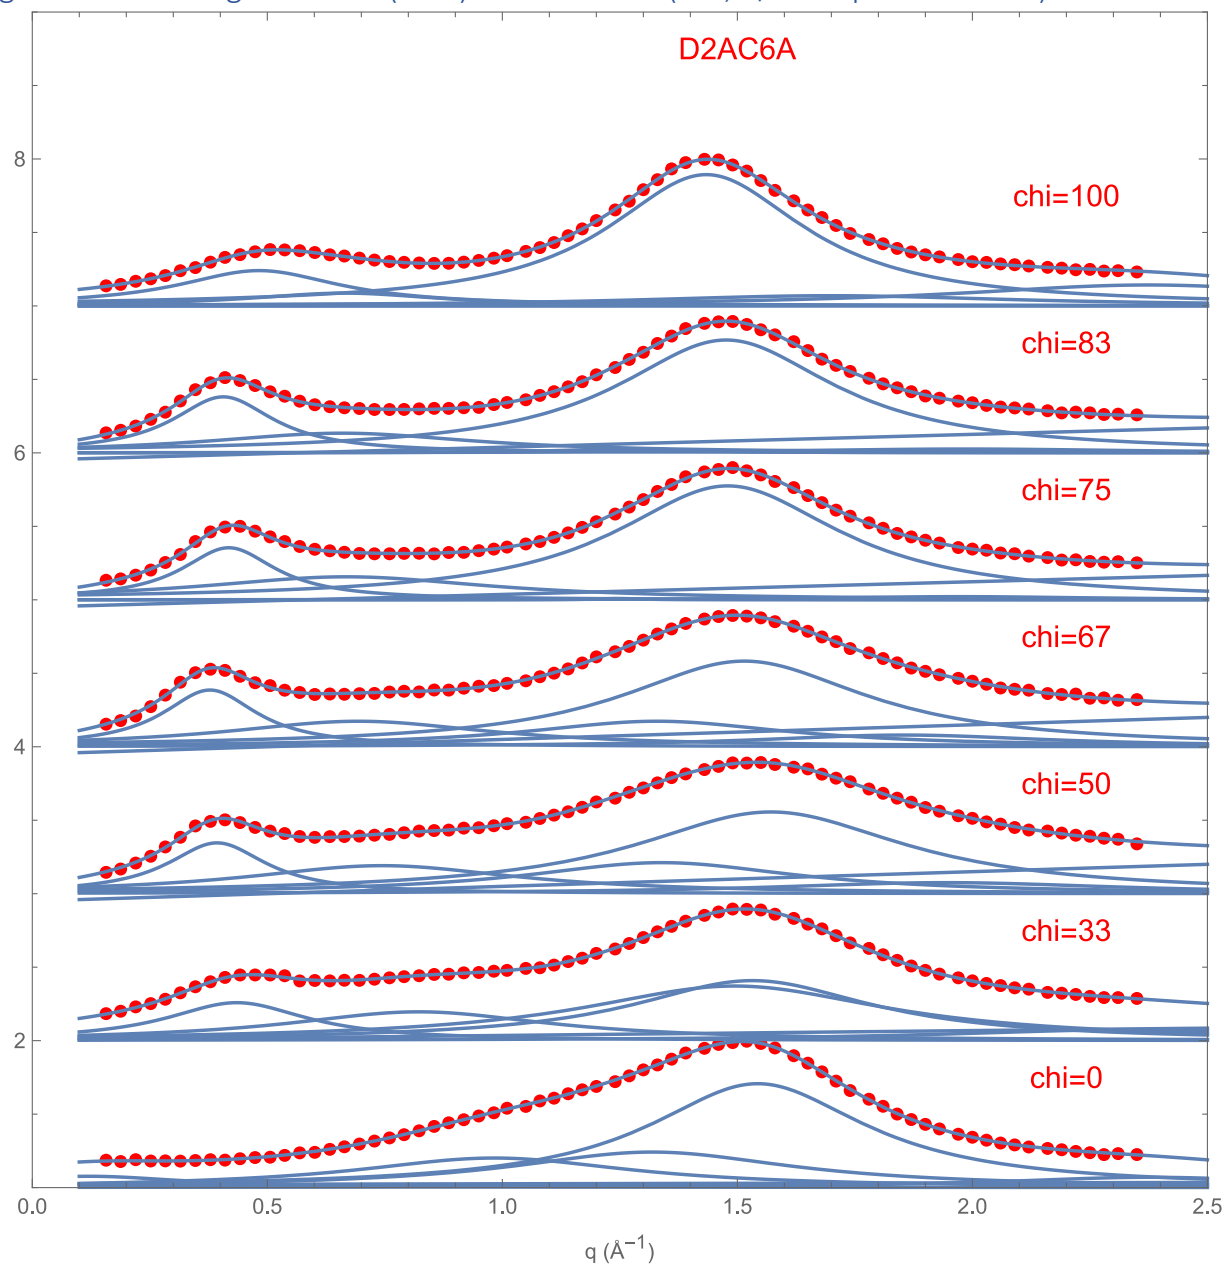

Figure S.24: Fitting functions and residuals for D2A C6A

Fitted Function

Residuals

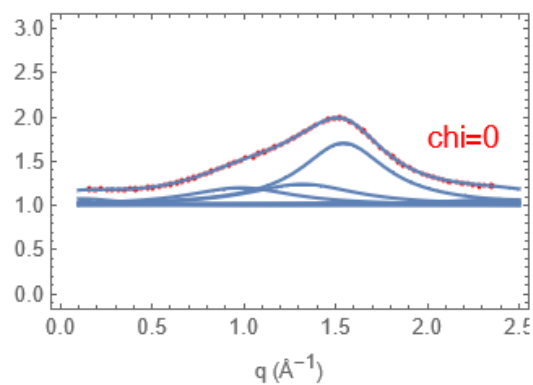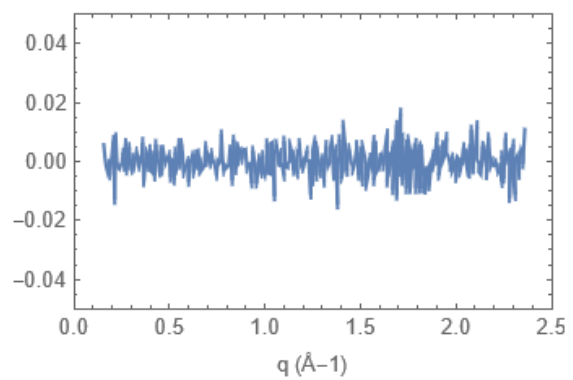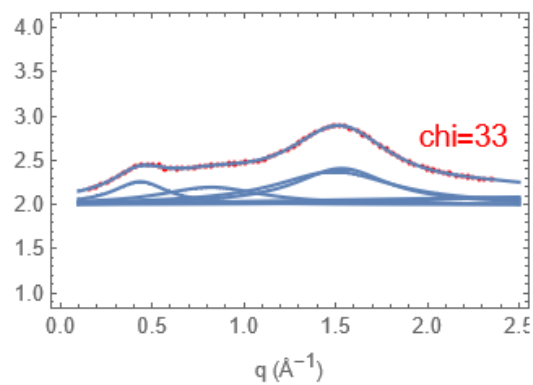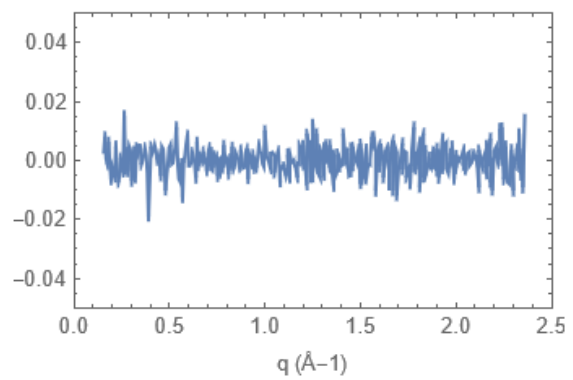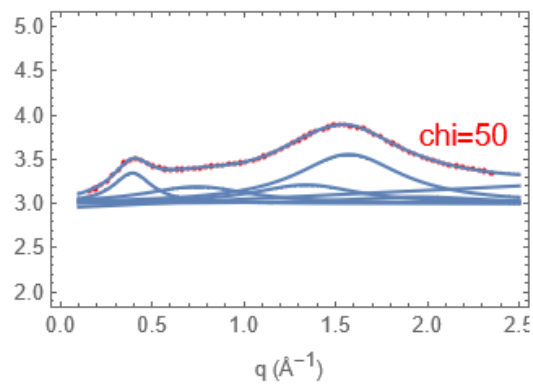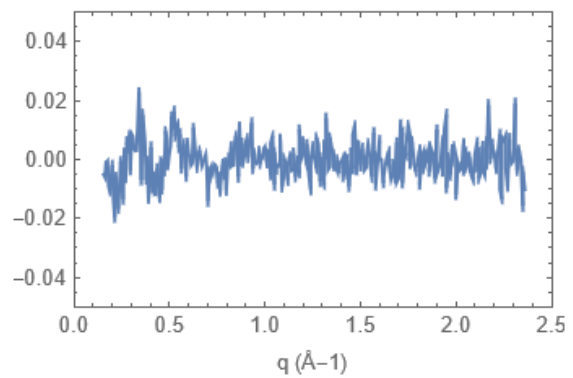



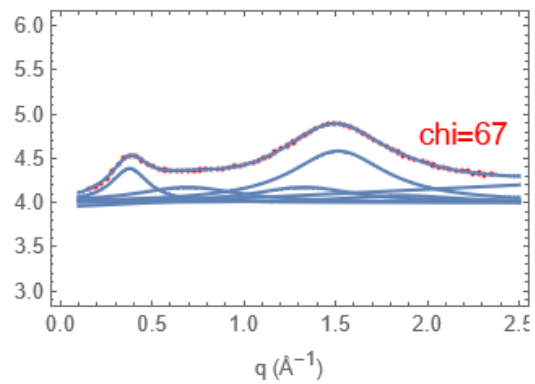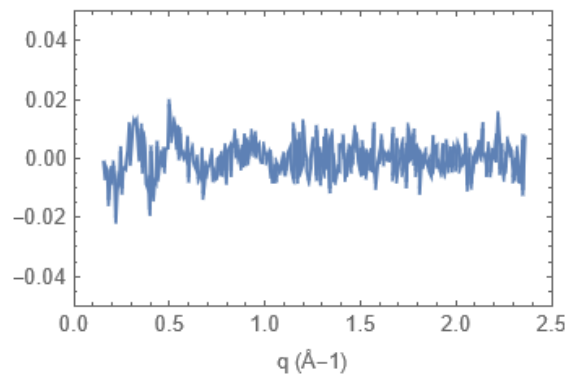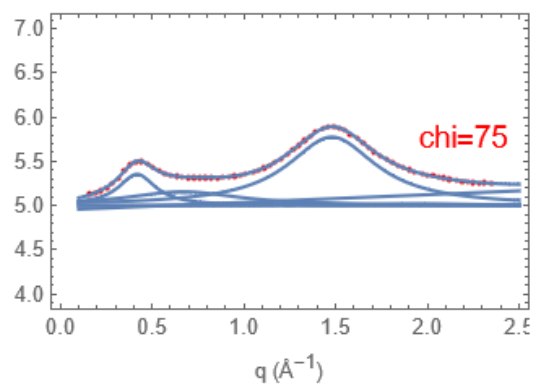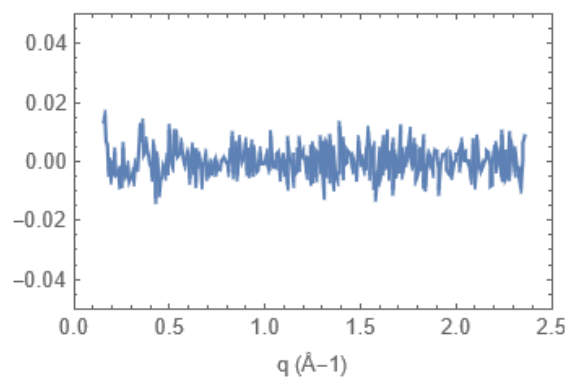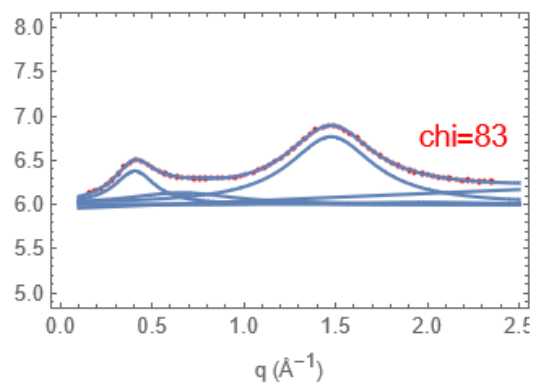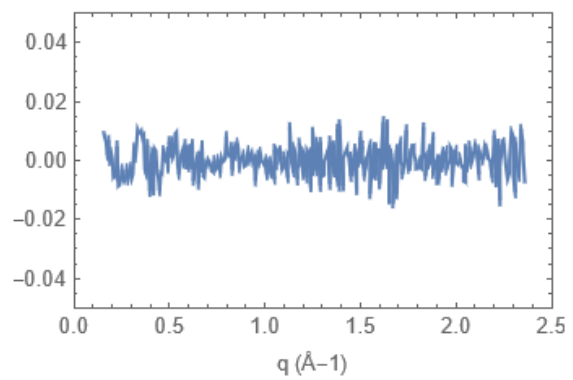

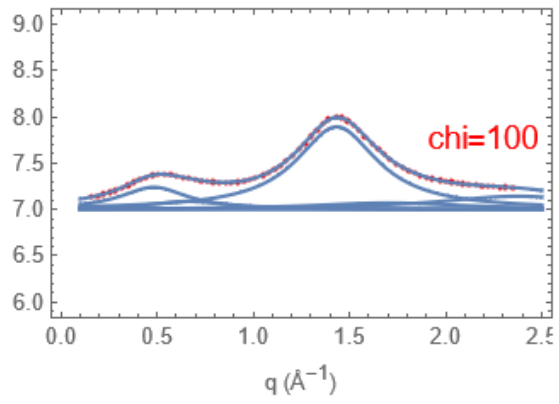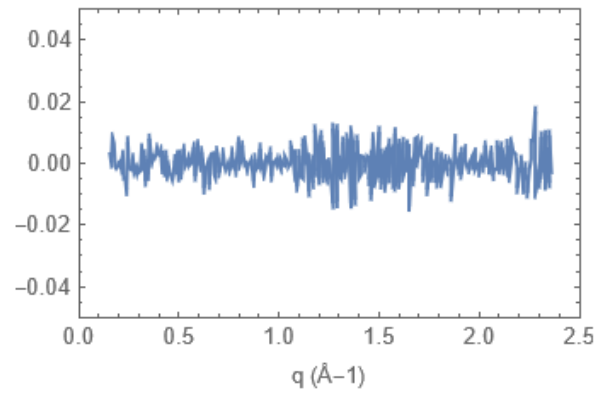

## D2A C8A

Table S.26: Local Structure Peaks for D2A C8A

| D2AC8A  |                      |                      |
|---------|----------------------|----------------------|
|         | q (Å <sup>-1</sup> ) | w (Å <sup>-1</sup> ) |
| chi=0   | 0                    | 0                    |
| chi=33  | 0.37889              | 0.166774             |
| chi=50  | 0.40049              | 0.155585             |
| chi=67  | 0.379101             | 0.119802             |
| chi=75  | 0.374985             | 0.113                |
| chi=83  | 0.377083             | 0.124475             |
| chi=100 | 0.418                | 0.186                |

Table S.27: Fitting Parameters for D2A C8A

| a    | b           | q <sub>01</sub> | w <sub>1</sub> | A <sub>1</sub> | q <sub>02</sub> | w <sub>2</sub> | A <sub>2</sub>          | q <sub>03</sub> | w <sub>3</sub> | A <sub>3</sub> | q <sub>04</sub> | w <sub>4</sub> | A <sub>4</sub> | q <sub>05</sub> | w <sub>5</sub> | A <sub>5</sub> |
|------|-------------|-----------------|----------------|----------------|-----------------|----------------|-------------------------|-----------------|----------------|----------------|-----------------|----------------|----------------|-----------------|----------------|----------------|
| 1.01 | -0.0088     | 0.075<br>2      | 0.289          | 0.0064<br>4    | 2.38            | 0.185          | 0.00273                 | 1.05            | 0.399          | 0.041<br>4     | 1.52            | 0.317          | 0.0787         | 2.13            | 0.173          | 0.00094<br>9   |
| 1.98 | 0.0359      | 0.379           | 0.167          | 0.0077<br>1    | 2.3             | 0.435          | 0.0142                  | 0.977           | 0.451          | 0.052          | 1.46            | 0.228          | 0.0253         | 1.6             | 0.325          | 0.0302         |
| 2.95 | 0.0837      | 0.4             | 0.156          | 0.0062<br>7    | 1.71            | 0.308          | 0.0105                  | 1.03            | 0.479          | 0.061<br>8     | 1.43            | 0.177          | 0.0104         | 1.54            | 0.206          | 0.0136         |
| 3.95 | 0.0761      | 0.379           | 0.12           | 0.0049<br>9    | 1.91            | 0.201          | 0.000202                | 0.85            | 0.538          | 0.041<br>5     | 1.43            | 0.158          | 0.0048<br>6    | 1.48            | 0.315          | 0.0573         |
| 4.95 | 0.0733      | 0.375           | 0.113          | 0.0051<br>2    | 2.39            | 0.0416         | 3.45E-05                | 0.723           | 0.468          | 0.024<br>4     | 1.43            | 0.182          | 0.0107         | 1.47            | 0.345          | 0.0578         |
| 5.95 | 0.0737      | 0.66            | 0.427          | 0.0176         | 2.32            | 0.0036<br>3    | 1.99*10 <sup>(-7)</sup> | 1.42            | 0.177          | 0.01           | 0.377           | 0.124          | 0.0058<br>3    | 1.45            | 0.321          | 0.0514         |
| 6.96 | 0.0094<br>8 | 0.418           | 0.186          | 0.0079         | 0.674           | 0.466          | 0.0146                  | 2.46            | 0.498          | 0.030<br>3     | 1.41            | 0.218          | 0.0351         | 1.59            | 0.479          | 0.0353         |

Figure S.25: Fitting functions (blue) and raw data (red, 1/5th of points shown) for D2A C8A

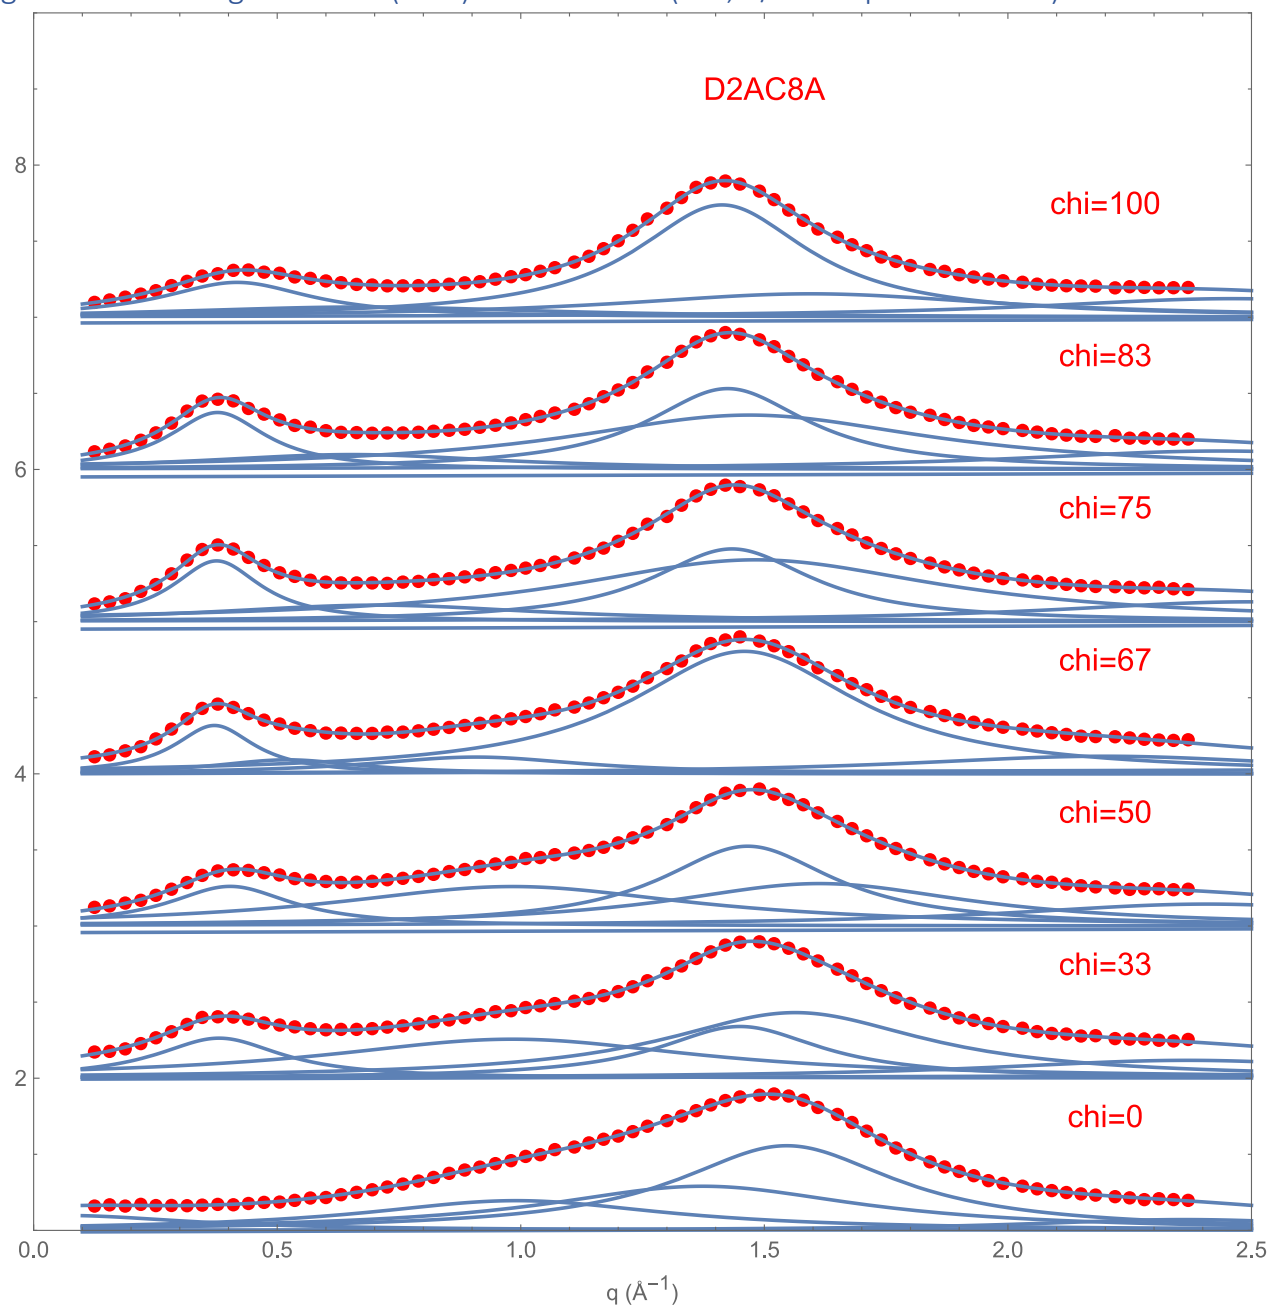

Figure S.26: Fitting functions and residuals for D2A C8A

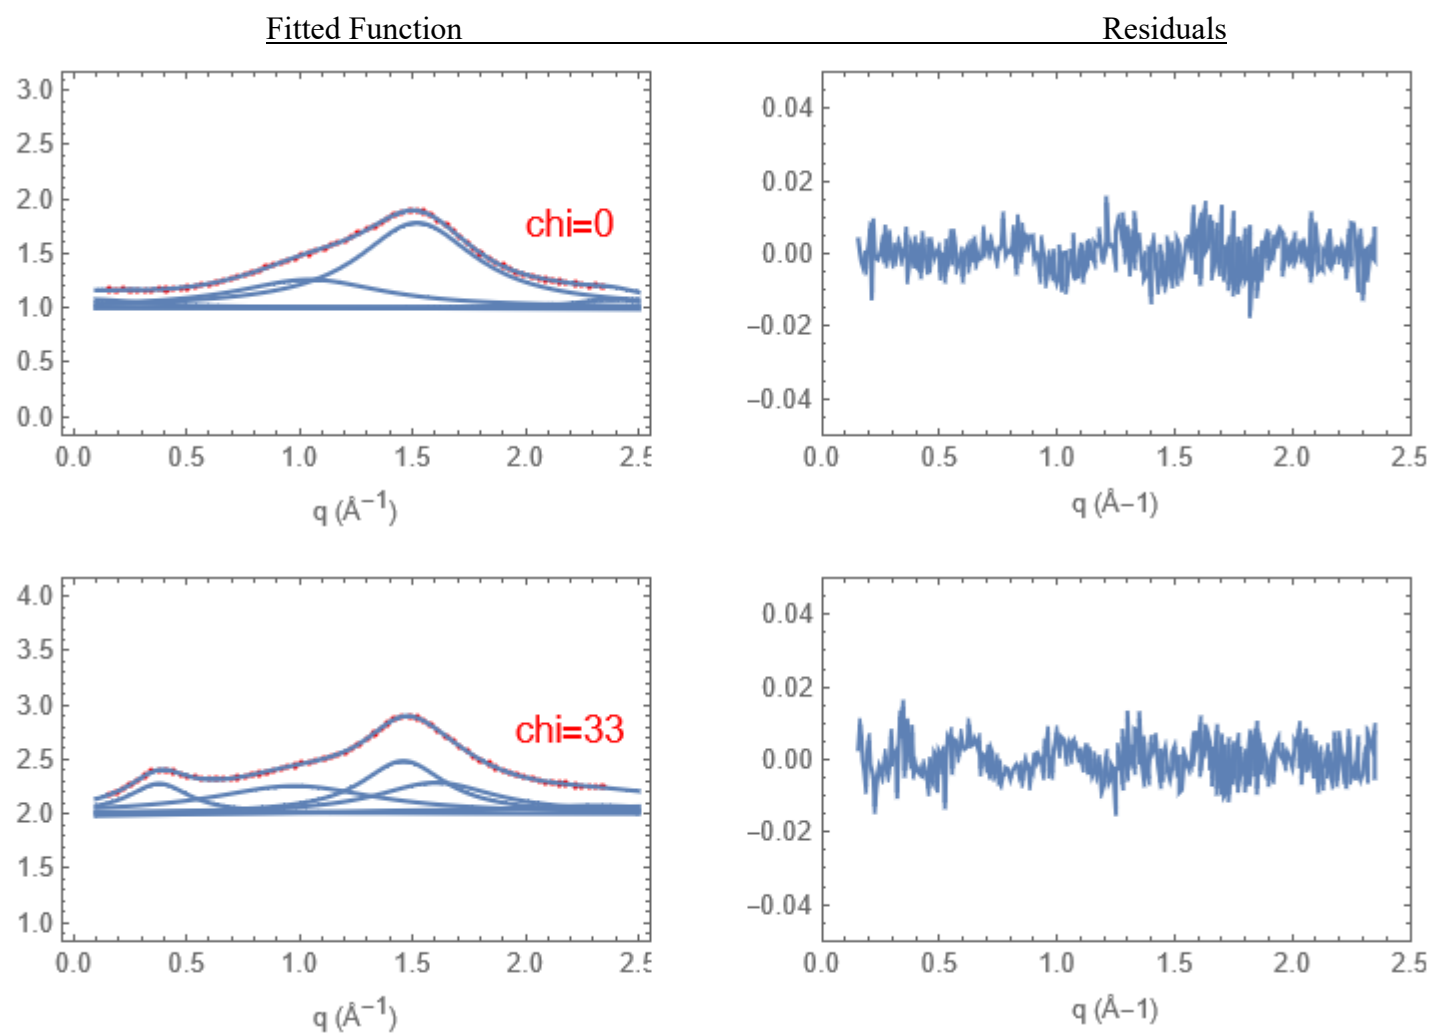

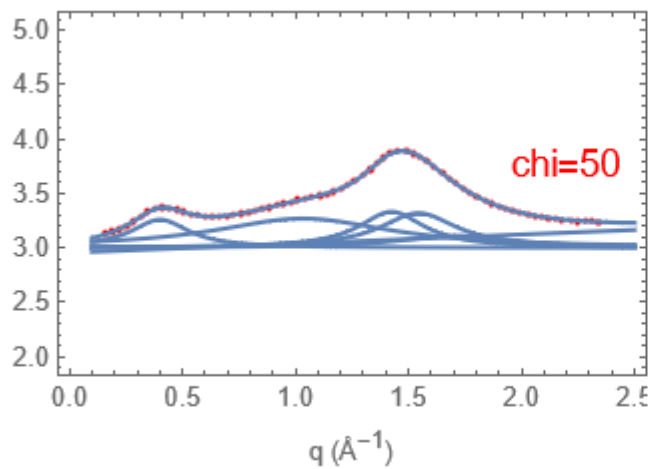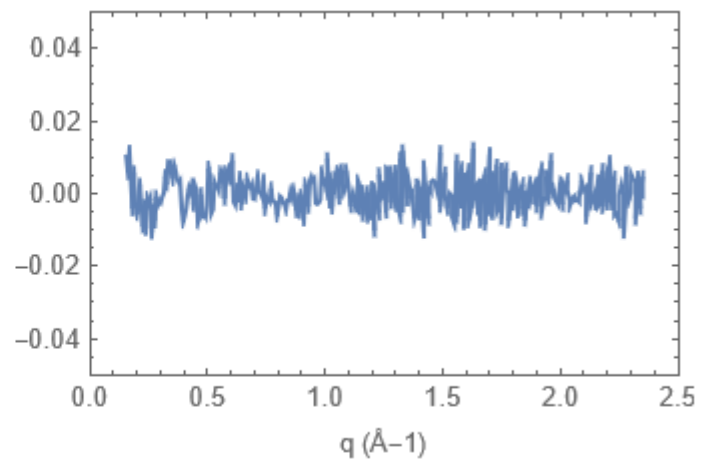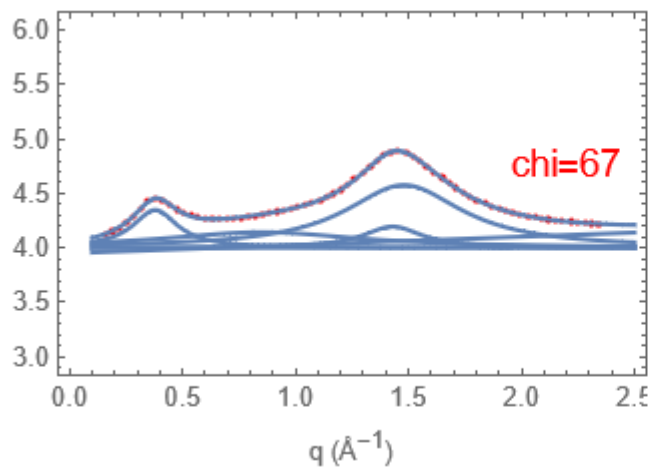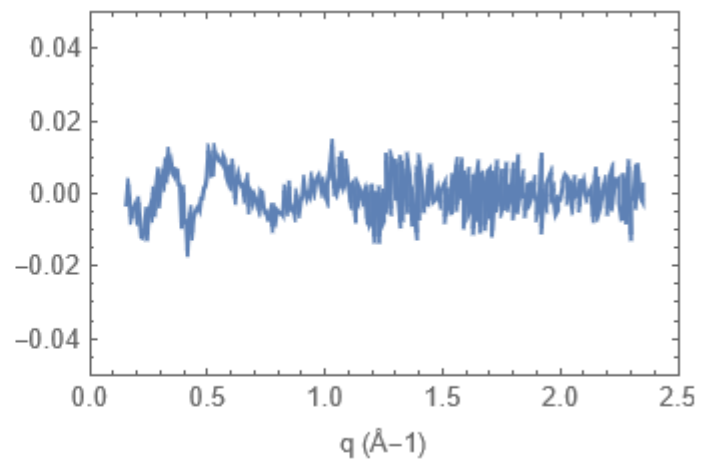

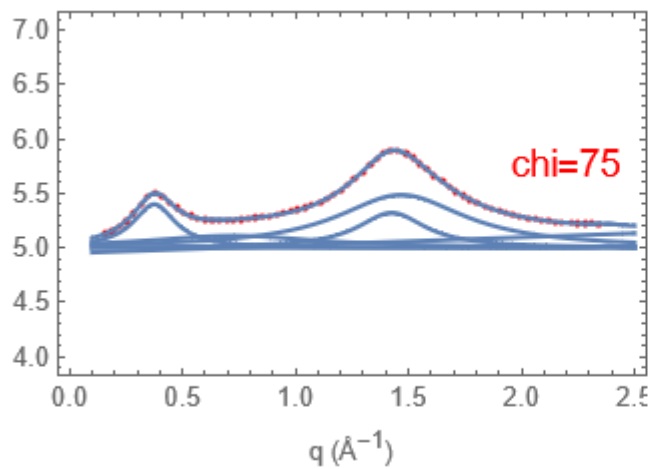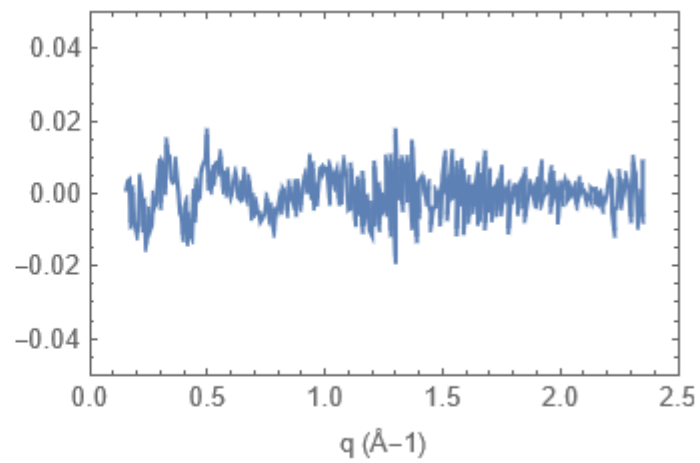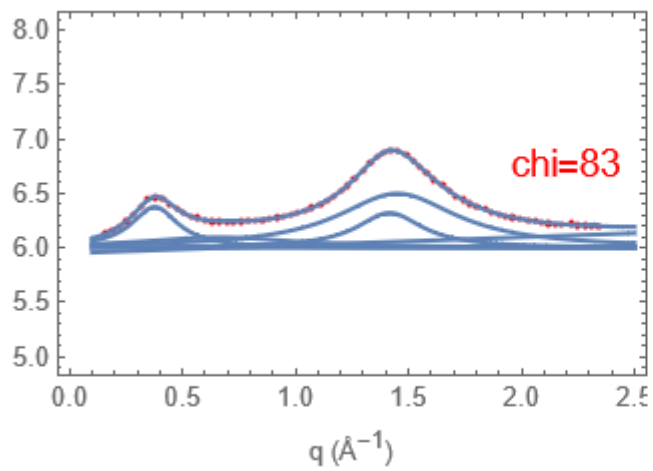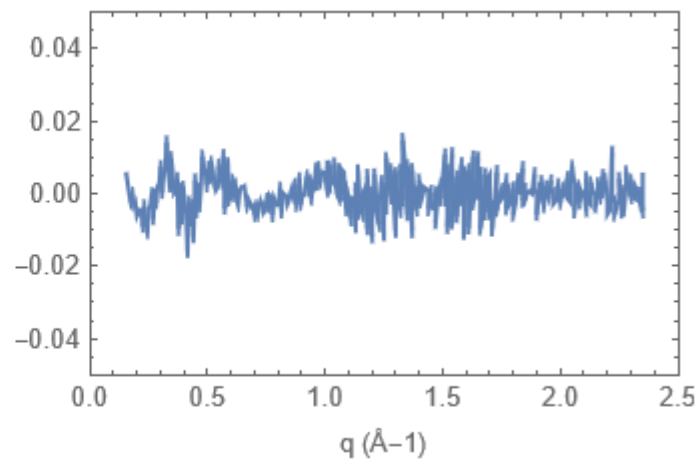

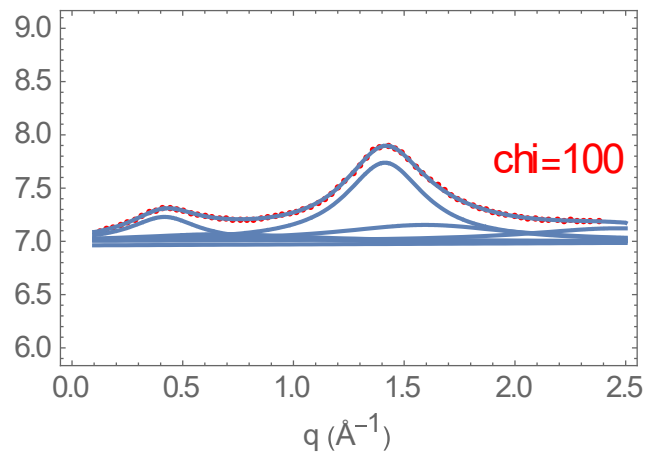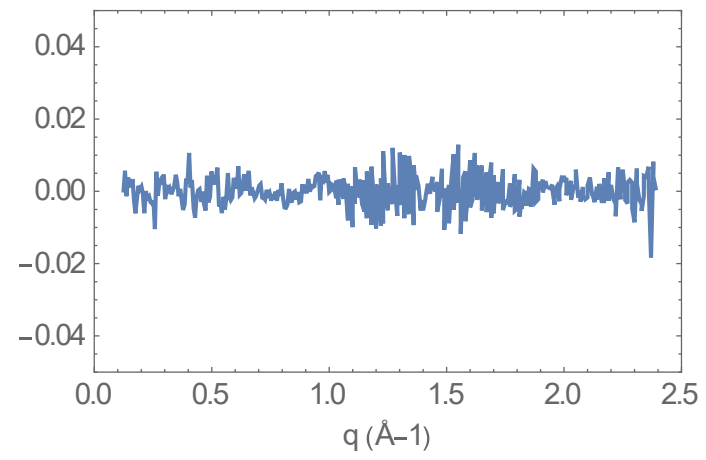



## S.4: Fitting Information for Mixtures Presented in Figure 6

### M18A C8A

Table S.28: Local Structure Peaks for M18A C8A

|         | M18AC8A                 |                         |
|---------|-------------------------|-------------------------|
|         | q ( $\text{\AA}^{-1}$ ) | w ( $\text{\AA}^{-1}$ ) |
| chi=75  | 0.318451                | 0.069415                |
| chi=83  | 0.332883                | 0.080044                |
| chi=100 | 0.41763                 | 0.185602                |

Table S.29: Fitting Parameters for M18A C8A

| a      | b       | q <sub>01</sub> | w <sub>1</sub> | A <sub>1</sub> | q <sub>02</sub> | w <sub>2</sub> | A <sub>2</sub> | q <sub>03</sub> | w <sub>3</sub> | A <sub>3</sub> | q <sub>04</sub> | w <sub>4</sub> | A <sub>4</sub> | q <sub>05</sub> | w <sub>5</sub> | A <sub>5</sub> |
|--------|---------|-----------------|----------------|----------------|-----------------|----------------|----------------|-----------------|----------------|----------------|-----------------|----------------|----------------|-----------------|----------------|----------------|
| 0.0222 | 0.00999 | 0.318           | 0.0694         | 0.00244        | 1.4             | 0.155          | 0.0101         | 1.47            | 0.3            | 0.0403         | 2.25            | 0.3            | 0.00545        | 0.398           | 0.111          | 0.00227        |
| 1.02   | 0.00999 | 0.333           | 0.08           | 0.00247        | 1.41            | 0.182          | 0.0181         | 1.48            | 0.329          | 0.0339         | 2.36            | 0.5            | 0.0174         | 0.415           | 0.135          | 0.00326        |
| 1.96   | 0.00948 | 0.418           | 0.186          | 0.0079         | 0.674           | 0.466          | 0.0146         | 2.46            | 0.498          | 0.0303         | 1.41            | 0.218          | 0.0351         | 1.59            | 0.479          | 0.0353         |

Figure S.27: Fitting functions (blue) and raw data (red, 1/5<sup>th</sup> of points shown) for M18A C8A

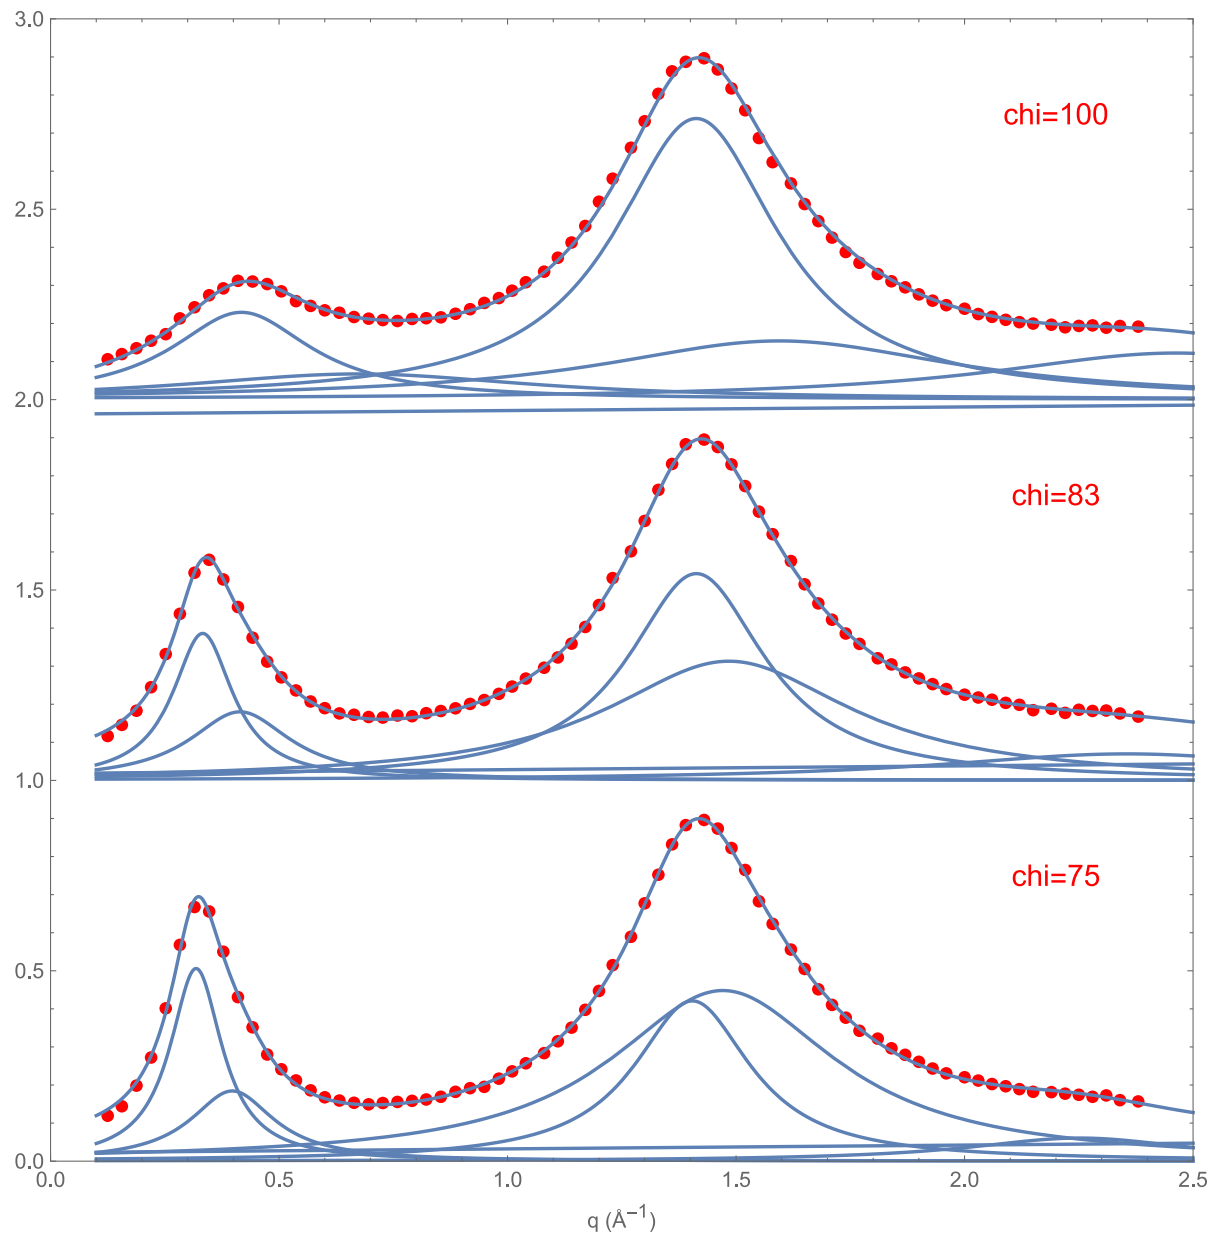

Figure S.28: Fitting functions and residuals for M18A C8A

Fitted Function

Residuals

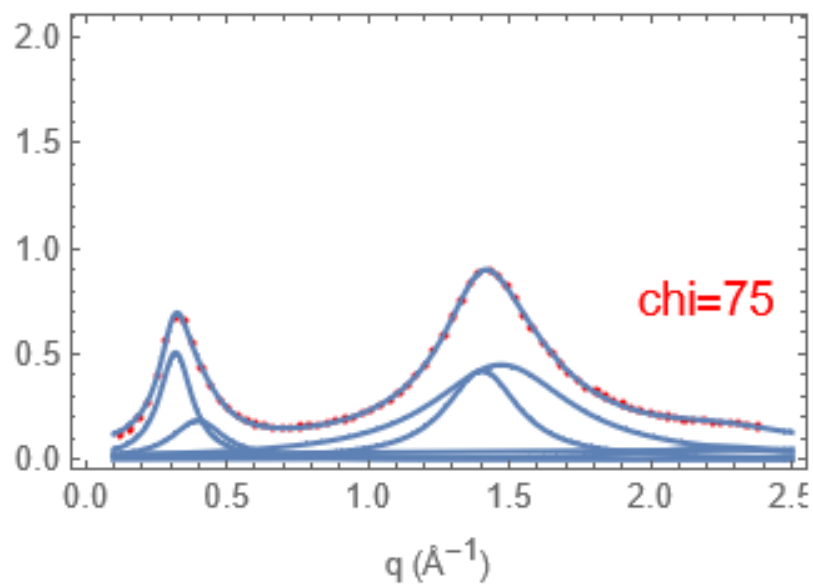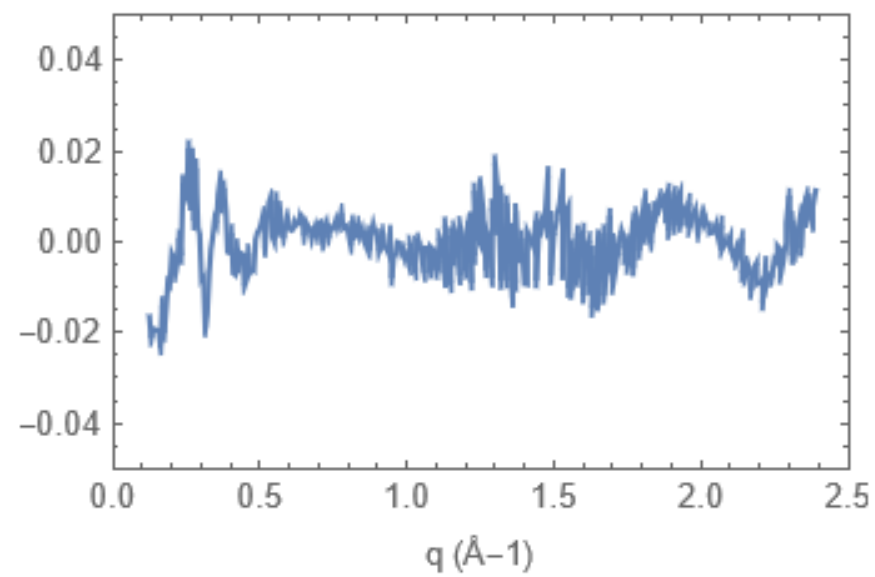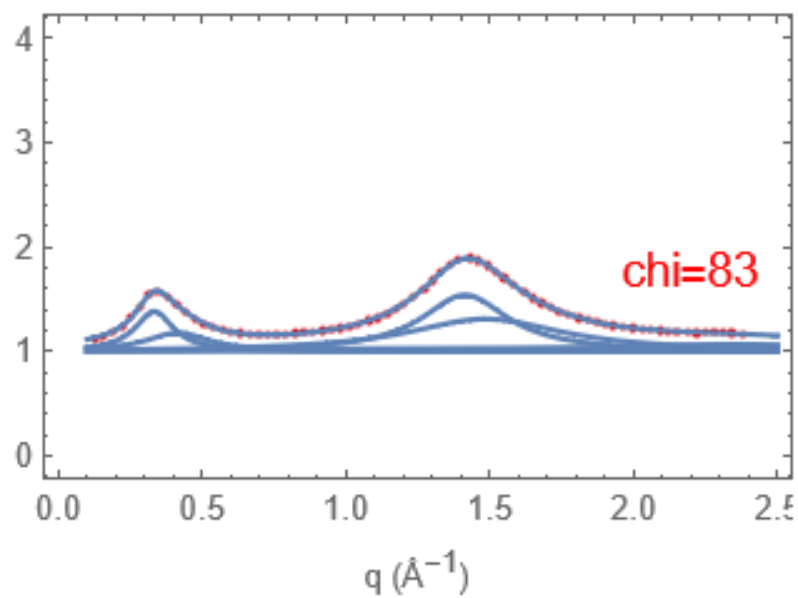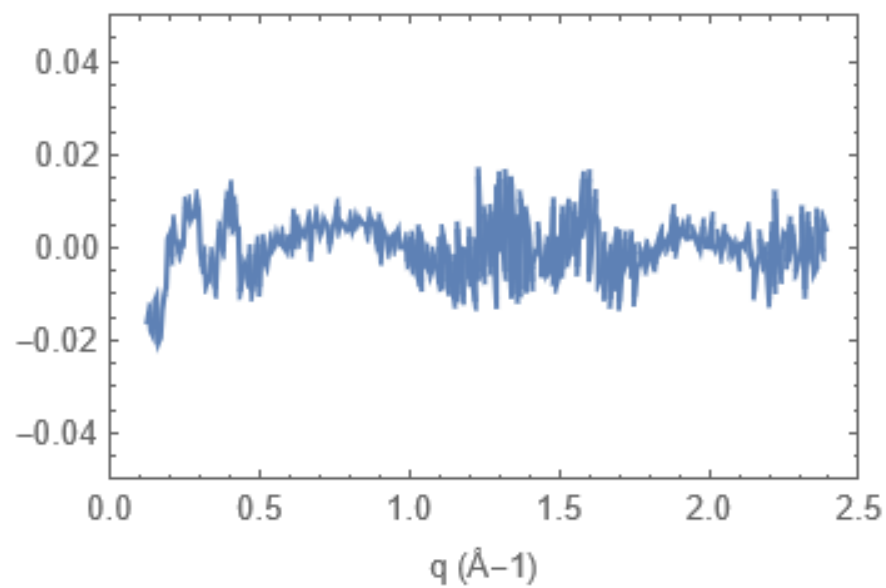

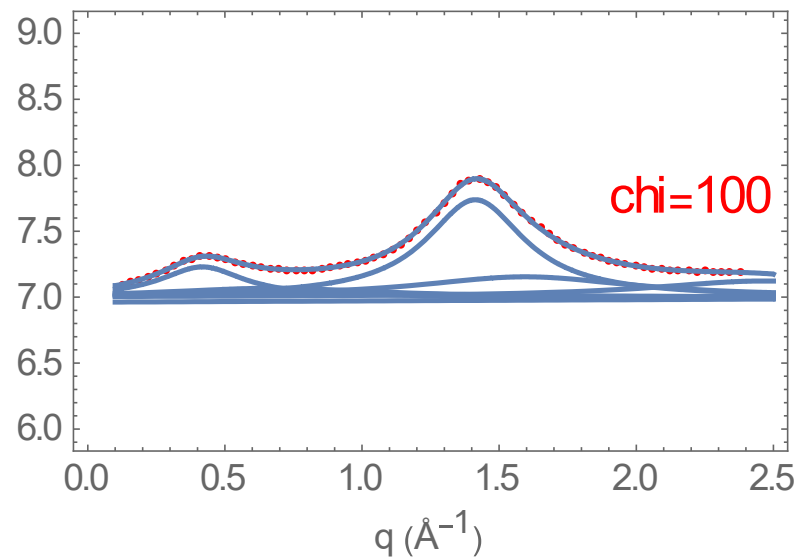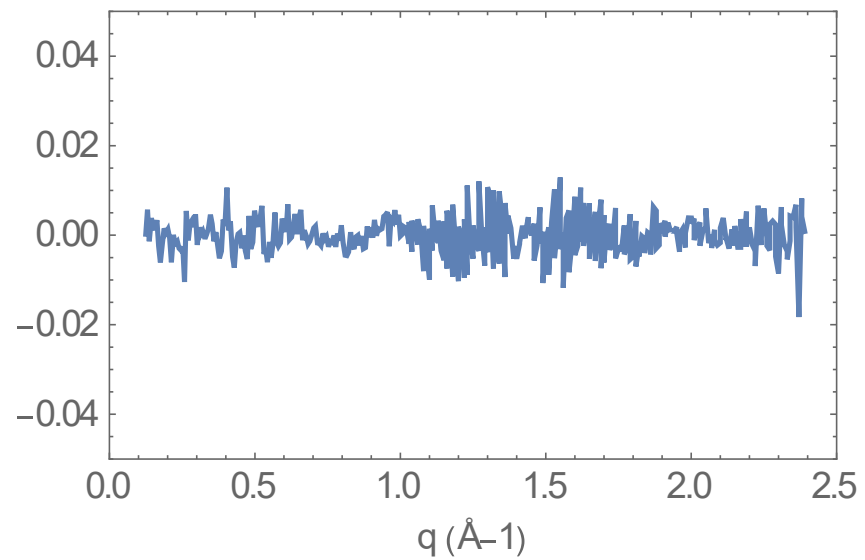

## S.5: Fitting Information for Mixtures Presented in Figure 7

### T6A HCyc

Table S.30: Local Structure Peaks for T6a HCyc

|        | T6AHCYC                 |                         |          |
|--------|-------------------------|-------------------------|----------|
|        | q ( $\text{\AA}^{-1}$ ) | w ( $\text{\AA}^{-1}$ ) | D        |
| 0      | 0                       | 0                       | 0        |
| chi=33 | 0.516731                | 0.141115                | 12.15948 |
| chi=50 | 0.501485                | 0.12816                 | 12.52915 |
| chi=67 | 0.514674                | 0.100444                | 12.20808 |
| chi=75 | 0.512741                | 0.102592                | 12.2541  |
| chi=83 | 0.560425                | 0.186199                | 11.21146 |

Table S.31: Fitting Parameters for T6a HCyc

| a    | b           | q <sub>01</sub> | w <sub>1</sub> | A <sub>1</sub> | q <sub>02</sub> | w <sub>2</sub> | A <sub>2</sub> | q <sub>03</sub> | w <sub>3</sub> | A <sub>3</sub> | q <sub>04</sub> | w <sub>4</sub> | A <sub>4</sub> | q <sub>05</sub> | w <sub>5</sub> | A <sub>5</sub> |
|------|-------------|-----------------|----------------|----------------|-----------------|----------------|----------------|-----------------|----------------|----------------|-----------------|----------------|----------------|-----------------|----------------|----------------|
| 2.05 | 0.015       | -0.301          | 0.093<br>4     | 0.0205         | 0.517           | 0.141          | 0.00234        | 1.34            | 0.188          | 0.0198         | 0.657           | 0.123          | 0.00090<br>7   | 1.49            | 0.323          | 0.032<br>2     |
| 3.05 | 0.015       | 0.501           | 0.128          | 0.0037<br>7    | 0.631           | 0.105          | 0.00081<br>4   | 1.33            | 0.173          | 0.0187         | 0.119           | 0.173          | 0.00237        | 1.53            | 0.347          | 0.033<br>4     |
| 4.01 | -0.015      | 0.515           | 0.1            | 0.0037<br>3    | 0.668           | 0.146          | 0.00205        | 1.31            | 0.172          | 0.0199         | 1.57            | 0.344          | 0.0376         | 2.36            | 0.5            | 0.031<br>5     |
| 5.01 | -0.015      | 0.513           | 0.103          | 0.0036<br>6    | 0.666           | 0.152          | 0.00224        | 1.31            | 0.171          | 0.02           | 1.56            | 0.35           | 0.037          | 2.37            | 0.5            | 0.031<br>9     |
| 6    | 0.0028<br>9 | 0.56            | 0.186          | 0.0072<br>2    | 2.48            | 0.497          | 0.0228         | 1.23            | 0.118          | 0.0033<br>7    | 1.33            | 0.162          | 0.0133         | 1.56            | 0.442          | 0.048<br>7     |

Figure S.29: Fitting functions (blue) and raw data (red, 1/5<sup>th</sup> of points shown) for T6A HCyc

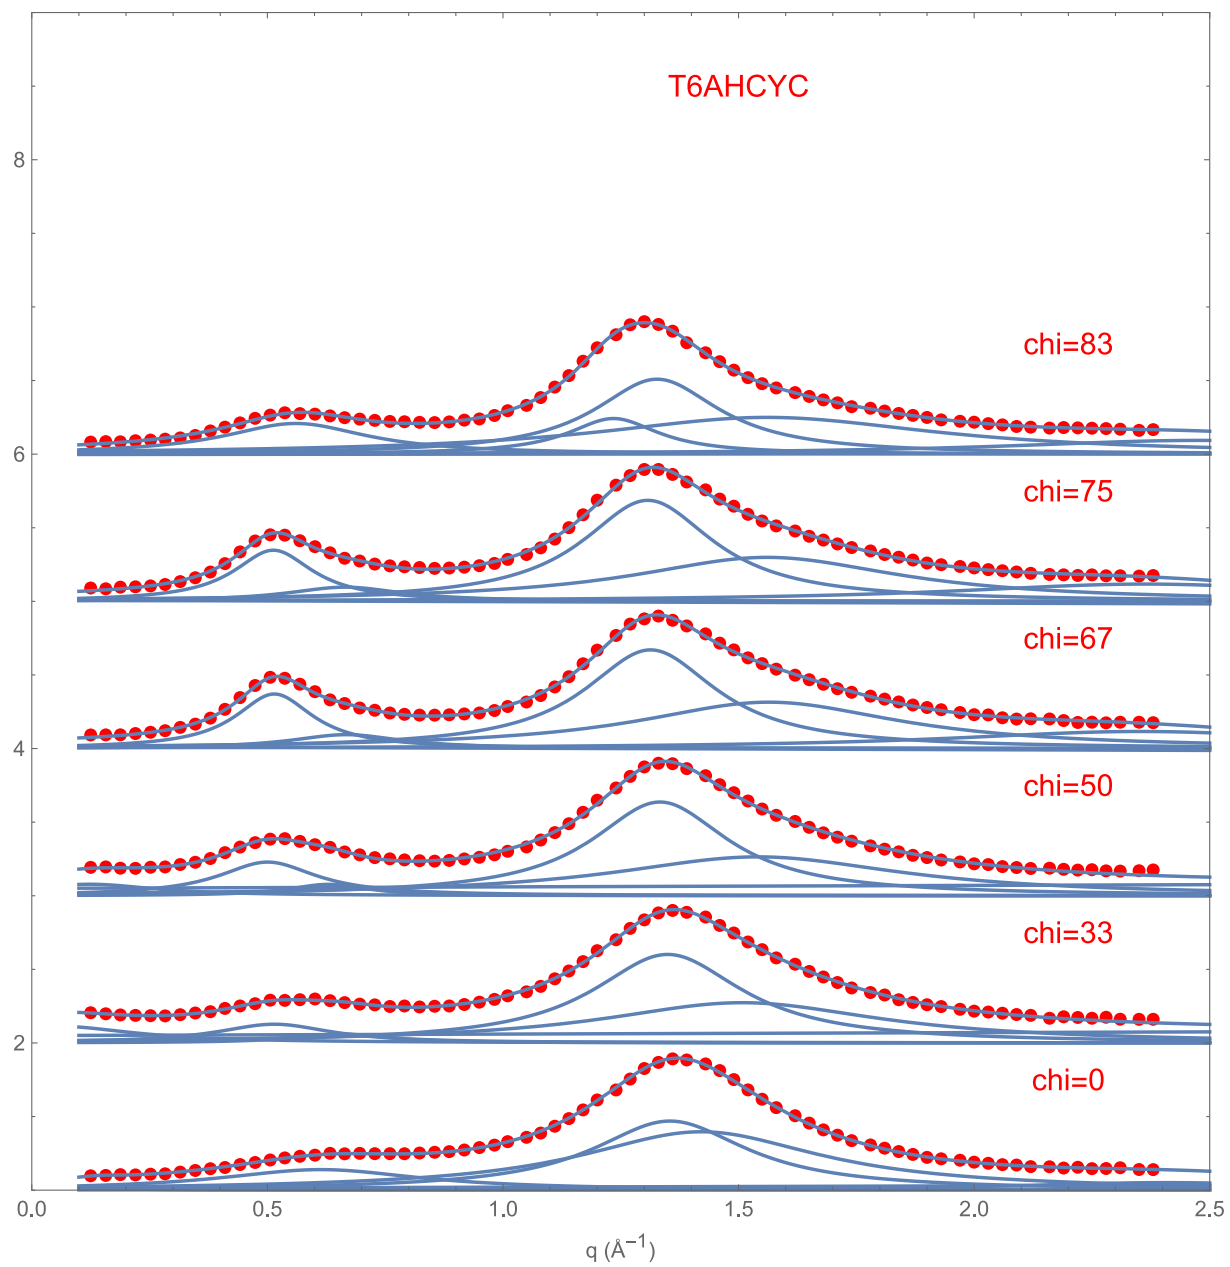

Figure S.30: Fitting functions and residuals for T6A HCyc

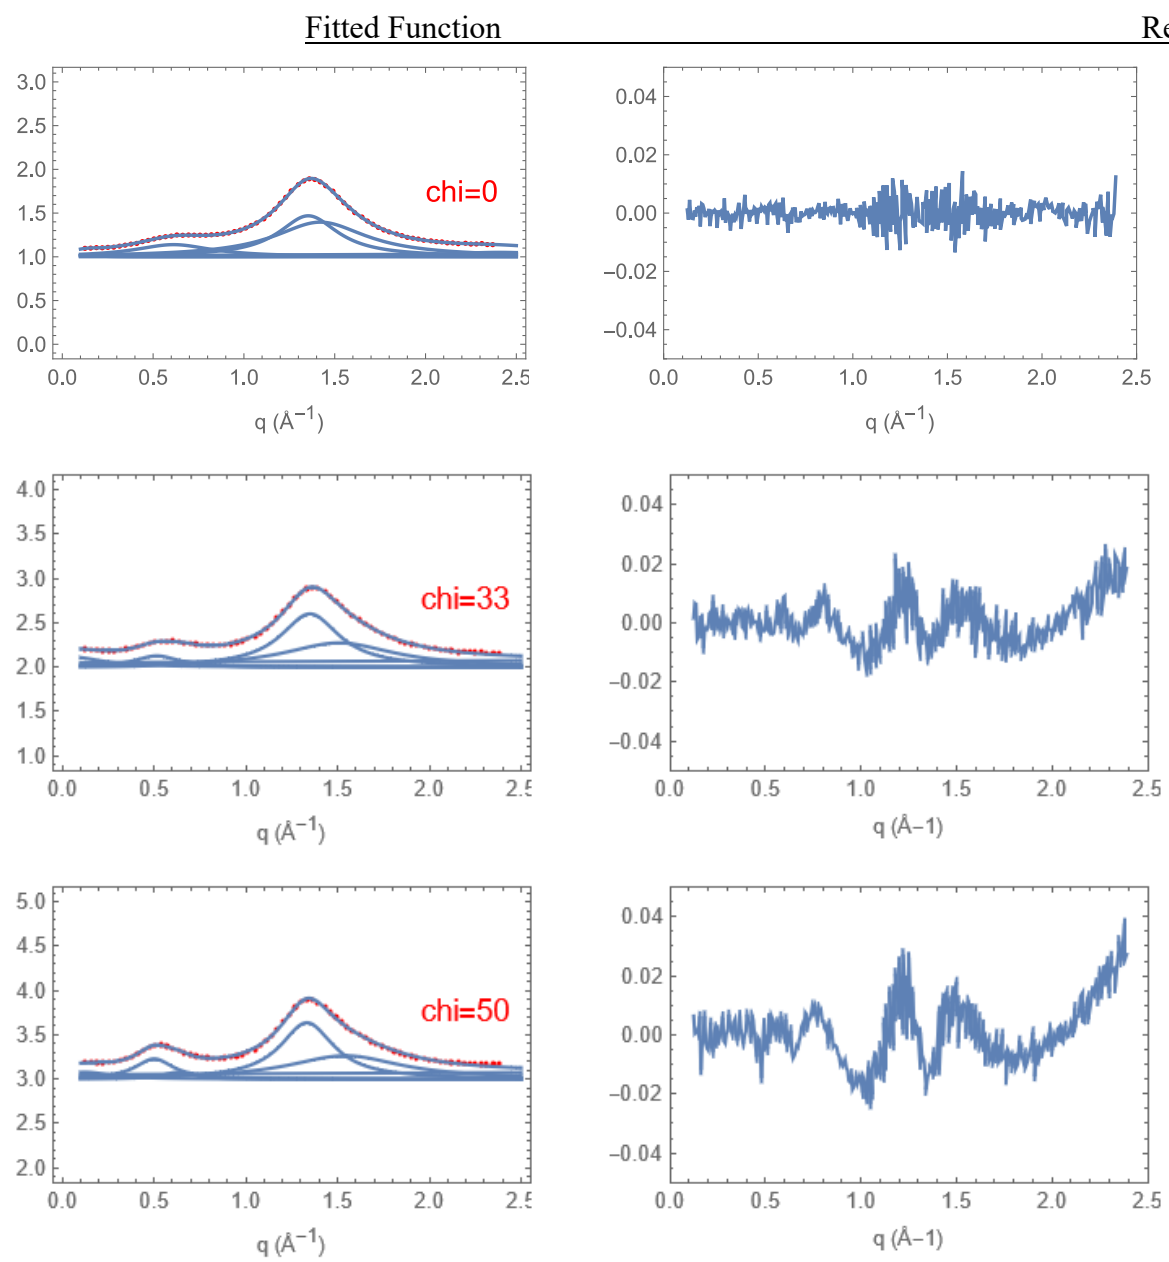

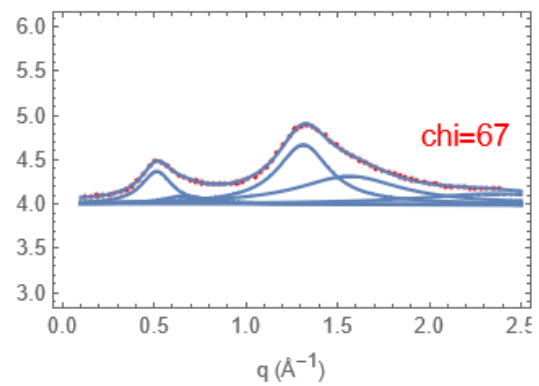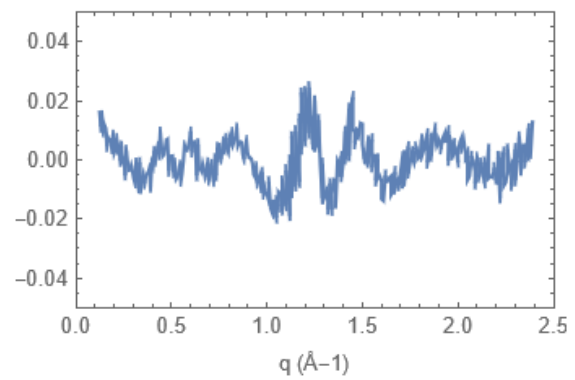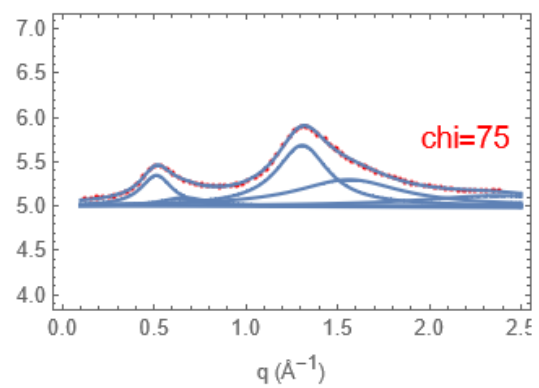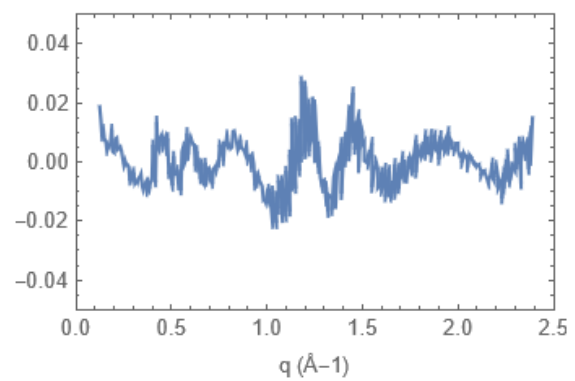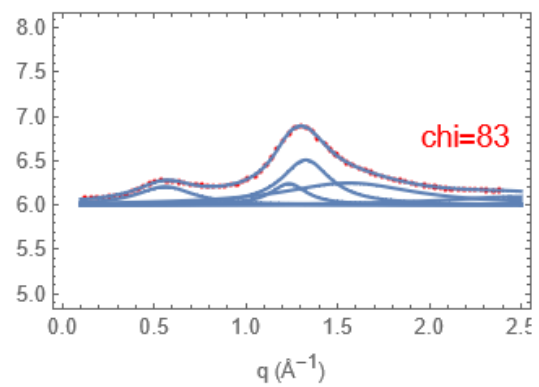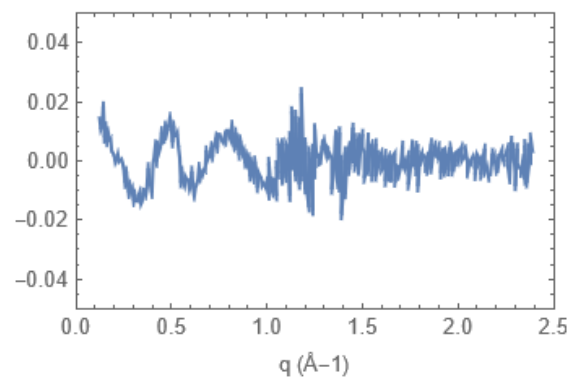



## T6A HBz

Table S.32: Local Structure Peaks for T6A HBz

| T6AHBz |                      |                      |
|--------|----------------------|----------------------|
|        | q (Å <sup>-1</sup> ) | w (Å <sup>-1</sup> ) |
| chi=0  | 0.613009             | 0.260993             |
| chi=33 | 0.53251              | 0.226206             |
| chi=50 | 0.518535             | 0.173511             |
| chi=67 | 0.527031             | 0.114658             |

Table S.33: Fitting Parameters for T2A C6A

| a     | b       | q <sub>01</sub> | w <sub>1</sub> | A <sub>1</sub> | q <sub>02</sub> | w <sub>2</sub> | A <sub>2</sub> | q <sub>03</sub> | w <sub>3</sub> | A <sub>3</sub> | q <sub>04</sub> | w <sub>4</sub> | A <sub>4</sub> | q <sub>05</sub> | w <sub>5</sub> | A <sub>5</sub> |
|-------|---------|-----------------|----------------|----------------|-----------------|----------------|----------------|-----------------|----------------|----------------|-----------------|----------------|----------------|-----------------|----------------|----------------|
|       |         |                 |                | 8.99E-05       |                 |                |                |                 |                |                |                 |                |                |                 |                |                |
| 0.011 | 0.00886 | 0.142           | 0.0693         |                | 0.613           | 0.261          | 0.00948        | 1.35            | 0.2            | 0.0187         | 1.42            | 0.312          | 0.0385         | 2.41            | 0.387          | 0.0076         |
| 0.981 | 0.00984 | 0.000547        | 0.0758         | 0.00679        | 0.533           | 0.226          | 0.00993        | 1.35            | 0.219          | 0.0209         | 1.51            | 0.334          | 0.0384         | 2.5             | 0.499          | 0.0188         |
| 1.97  | 0.00991 | 0.00437         | 0.119          | 0.00987        | 0.519           | 0.174          | 0.0101         | 1.35            | 0.223          | 0.0235         | 1.53            | 0.329          | 0.054          | 2.52            | 0.5            | 0.0261         |
| 3.03  | 0.0095  | 1.38            | 0.212          | 0.0177         | 0.527           | 0.115          | 0.0065         | 1.24            | 0.161          | 0.00297        | 1.58            | 0.302          | 0.0481         | 2.39            | 0.263          | 0.00372        |

Figure S.31: Fitting functions (blue) and raw data (red, 1/5<sup>th</sup> of points shown) for T6A HBz

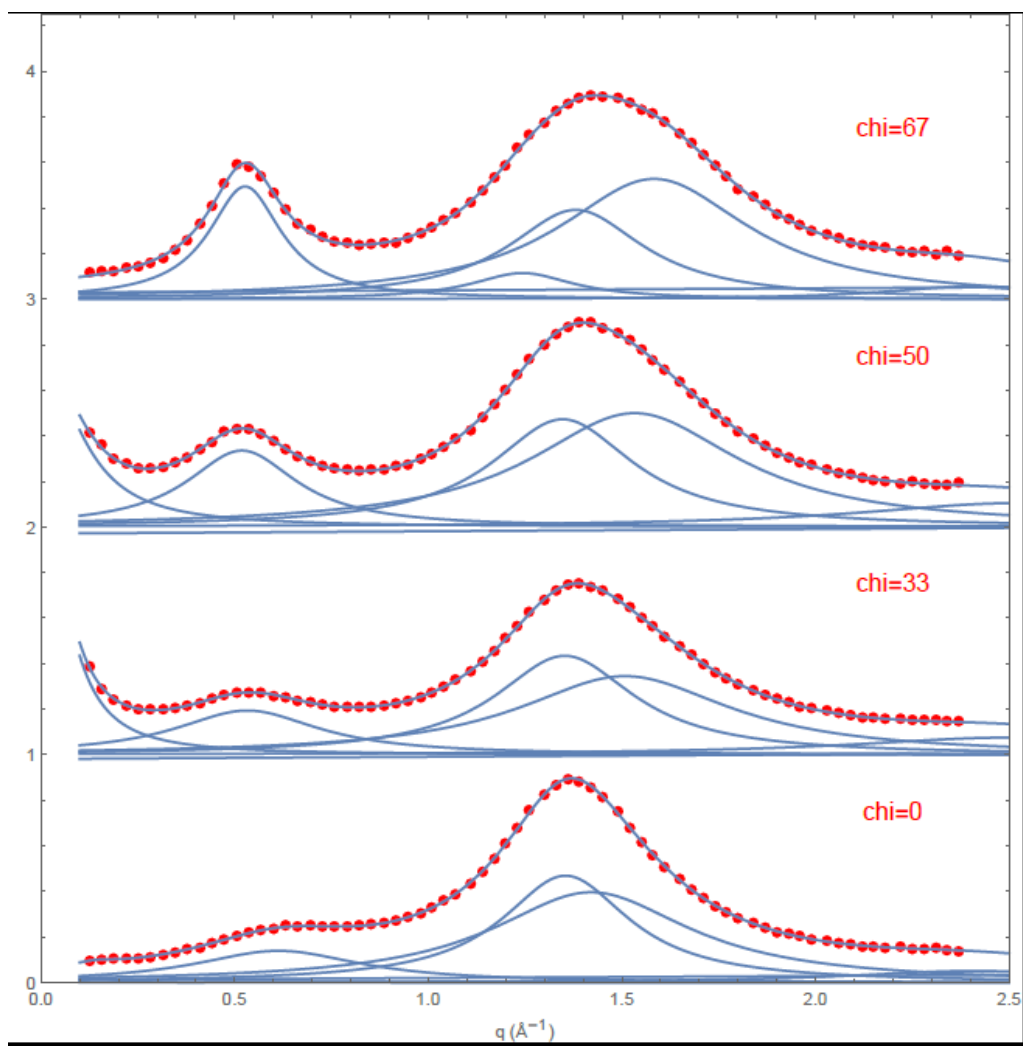

Figure S.32: Fitting functions and residuals for T6A HBz

Fitted Function

Residuals

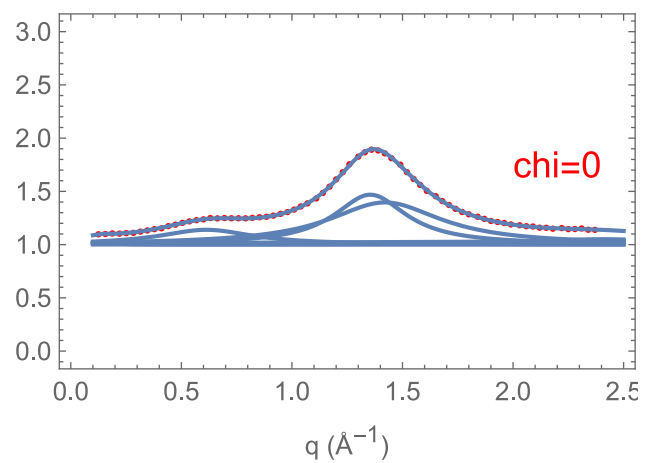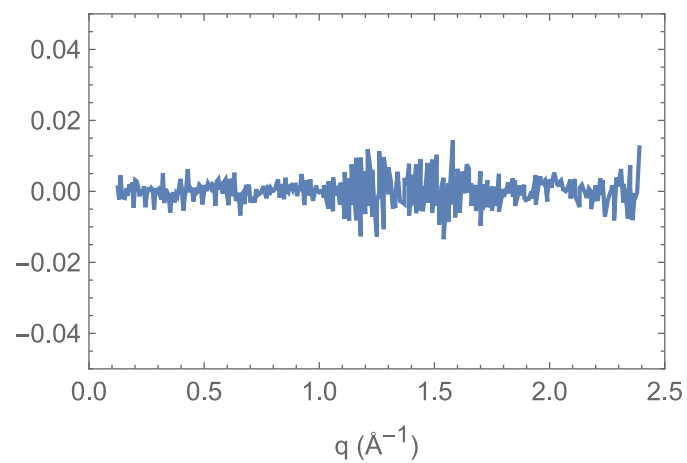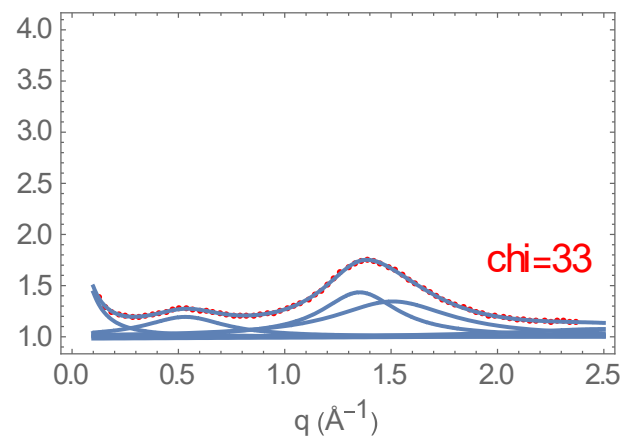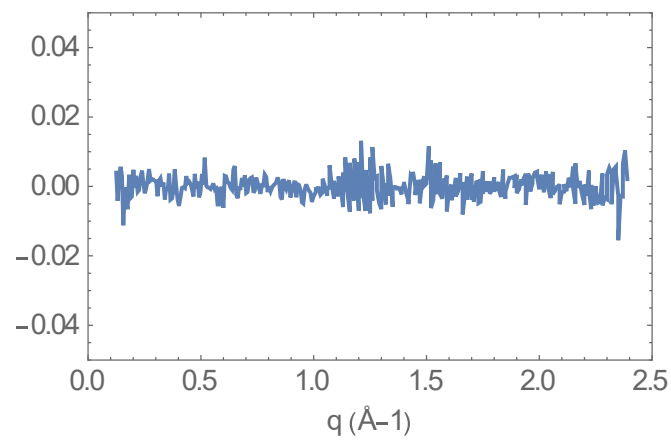

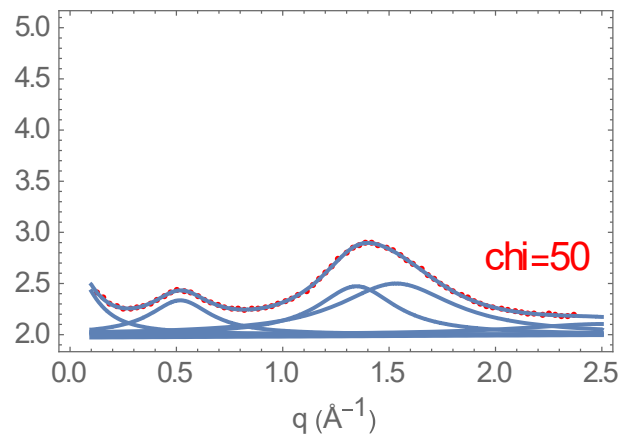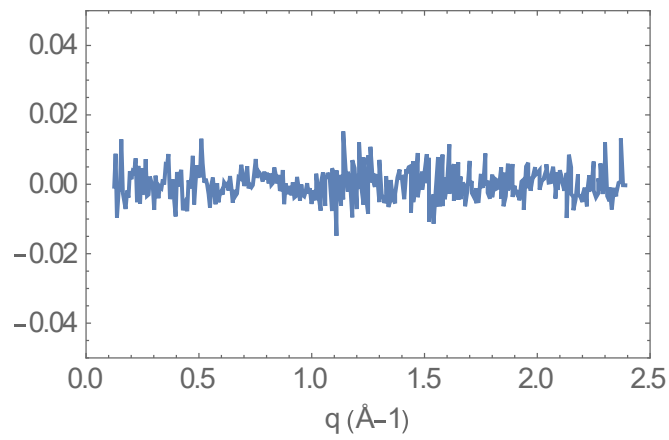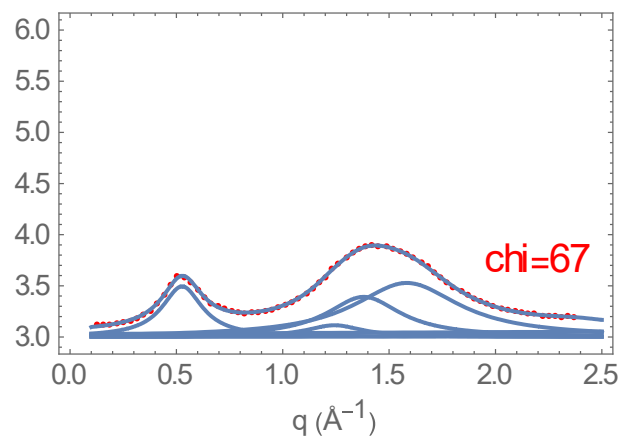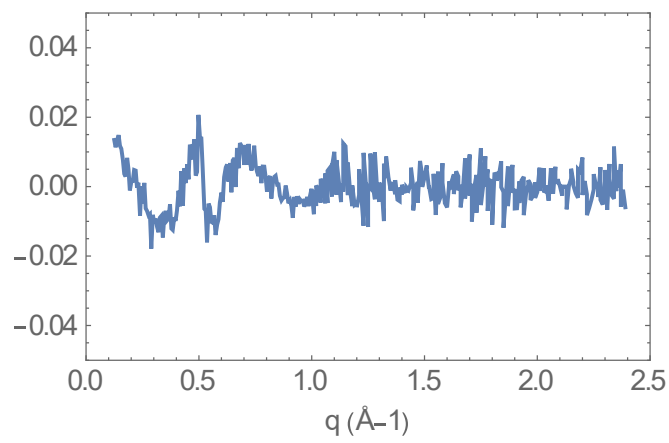

T6A HSa

Table S.34: Local Structure Peaks for T6A HSa

|        | T6AHSa               |                      |
|--------|----------------------|----------------------|
|        | q (Å <sup>-1</sup> ) | w (Å <sup>-1</sup> ) |
| chi=0  | 0.613009             | 0.260993             |
| chi=33 | 0.516897             | 0.179139             |
| chi=50 | 0.517378             | 0.108299             |
| chi=67 | 0.520673             | 0.110168             |

Table S.35: Fitting Parameters for T6A HSa

| a     | b       | q <sub>01</sub> | w <sub>1</sub> | A <sub>1</sub> | q <sub>02</sub> | w <sub>2</sub> | A <sub>2</sub> | q <sub>03</sub> | w <sub>3</sub> | A <sub>3</sub> | q <sub>04</sub> | w <sub>4</sub> | A <sub>4</sub> | q <sub>05</sub> | w <sub>5</sub> | A <sub>5</sub> |
|-------|---------|-----------------|----------------|----------------|-----------------|----------------|----------------|-----------------|----------------|----------------|-----------------|----------------|----------------|-----------------|----------------|----------------|
| 0.011 | 0.00886 | 0.142           | 0.0693         | 8.99E-05       | 0.613           | 0.261          | 0.00948        | 1.35            | 0.2            | 0.0187         | 1.42            | 0.312          | 0.0385         | 2.41            | 0.387          | 0.0076         |
| 0.986 | 0.0098  | 0.00853         | 0.108          | 0.00829        | 0.517           | 0.179          | 0.0116         | 1.35            | 0.213          | 0.0229         | 1.53            | 0.336          | 0.05           | 2.55            | 0.499          | 0.0227         |
| 2.01  | 0.00998 | 0.626           | 0.169          | 0.00262        | 0.517           | 0.108          | 0.00557        | 1.35            | 0.215          | 0.0214         | 2.55            | 0.5            | 0.0298         | 1.56            | 0.336          | 0.0603         |
| 3.01  | 0.00997 | 0.636           | 0.167          | 0.00234        | 0.521           | 0.11           | 0.00504        | 1.35            | 0.308          | 0.047          | 2.44            | 0.362          | 0.015          | 1.61            | 0.298          | 0.0474         |

Figure S.33: Fitting functions (blue) and raw data (red, 1/5<sup>th</sup> of points shown) for T6A HSa

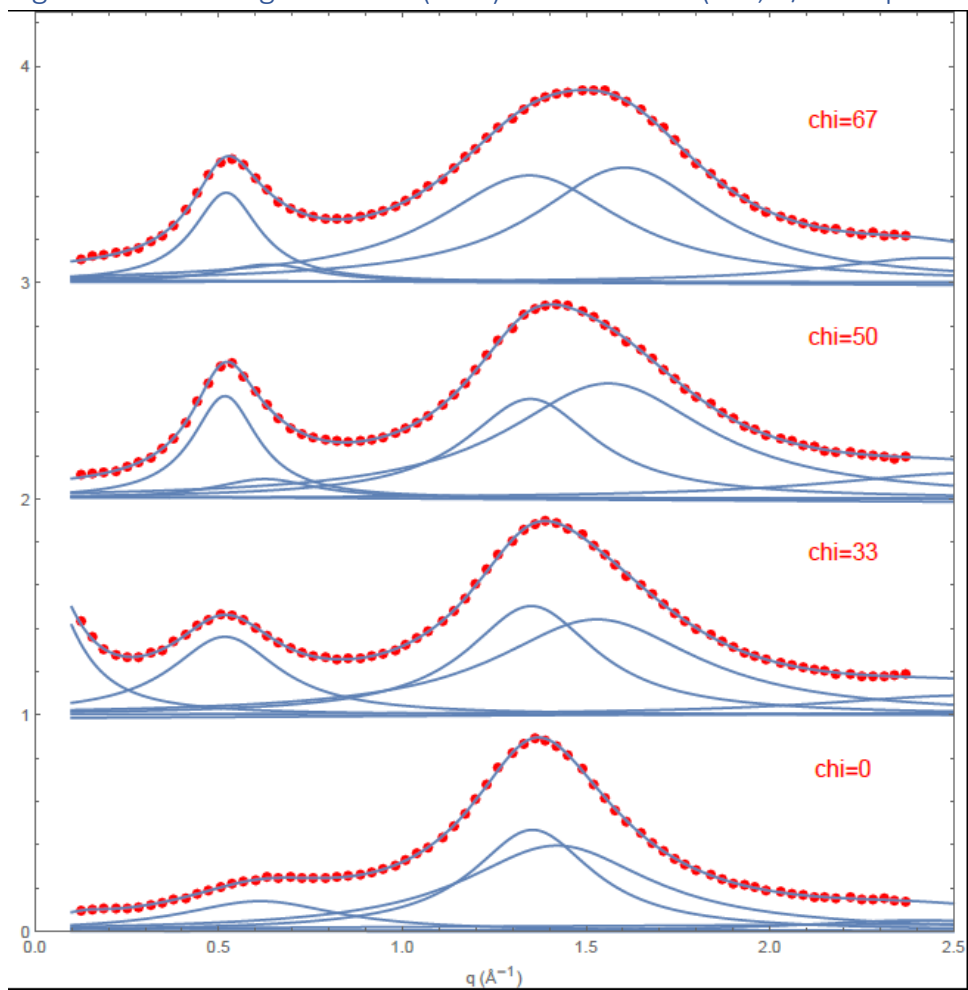

Figure S.34: Fitting functions and residuals for T6A HSa

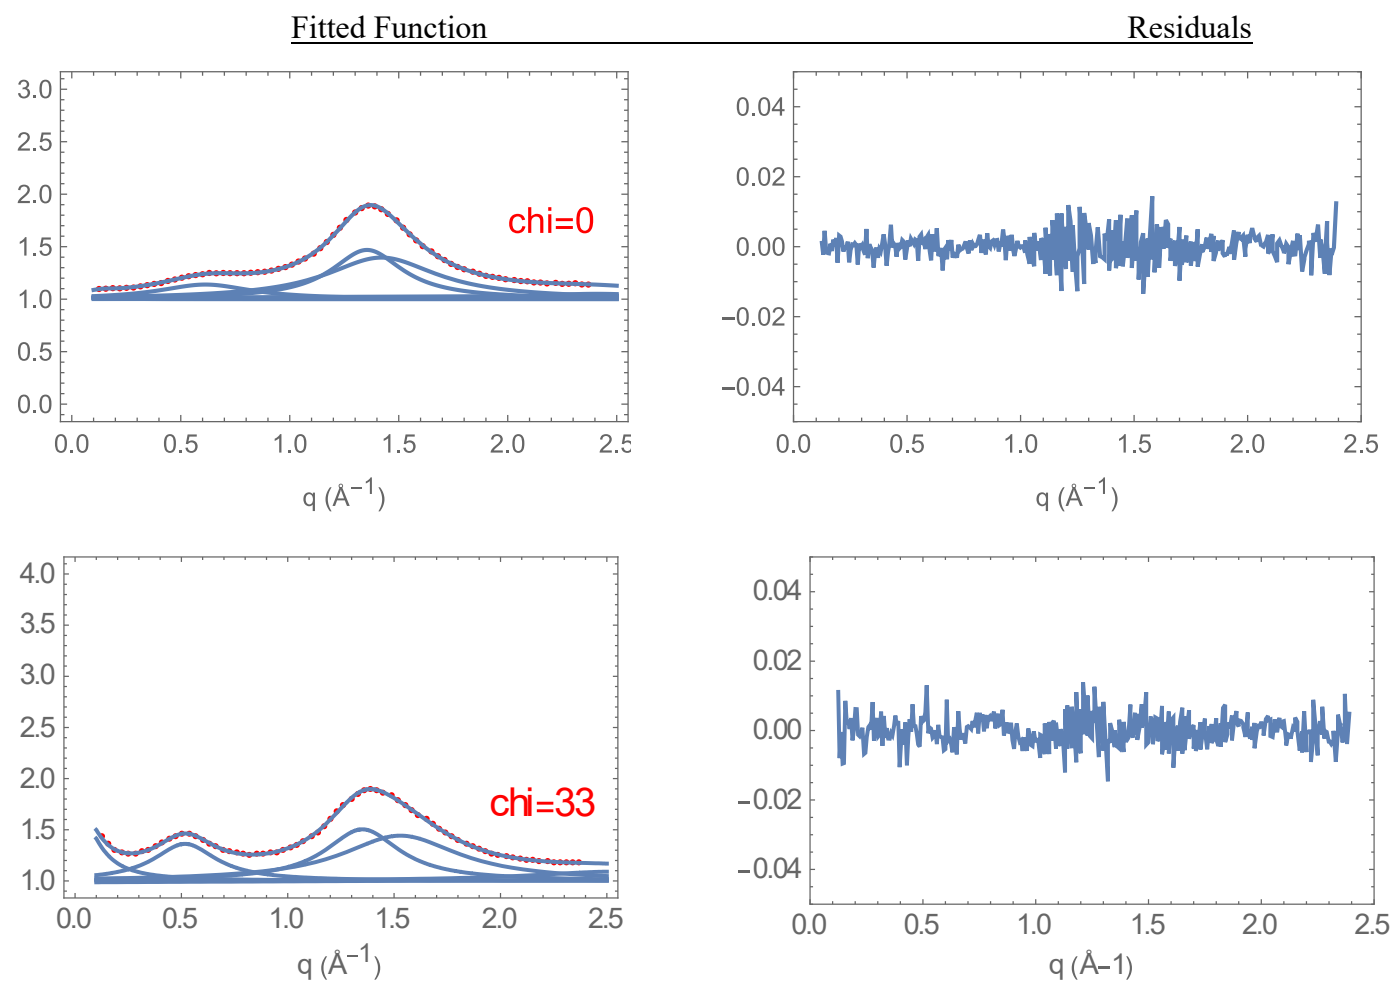

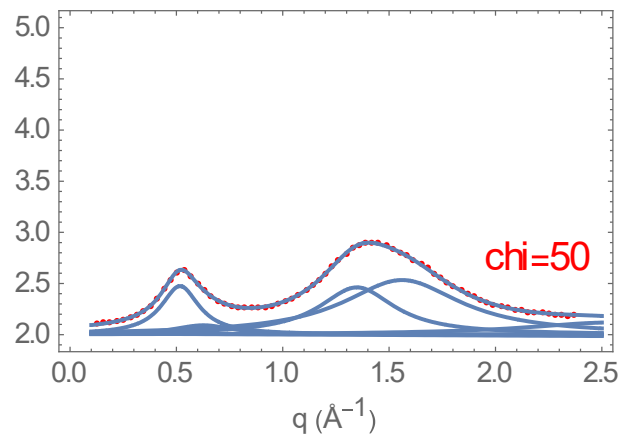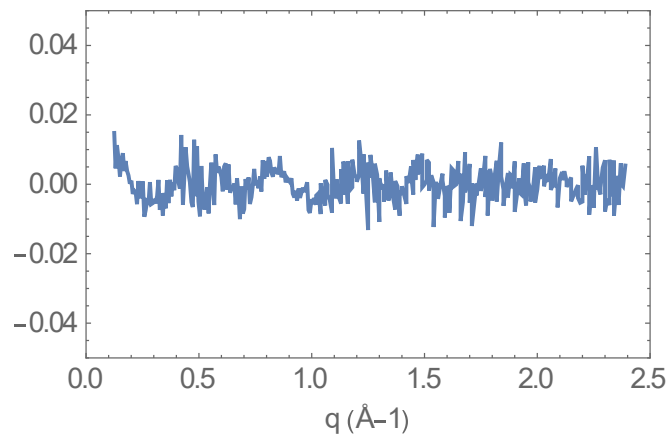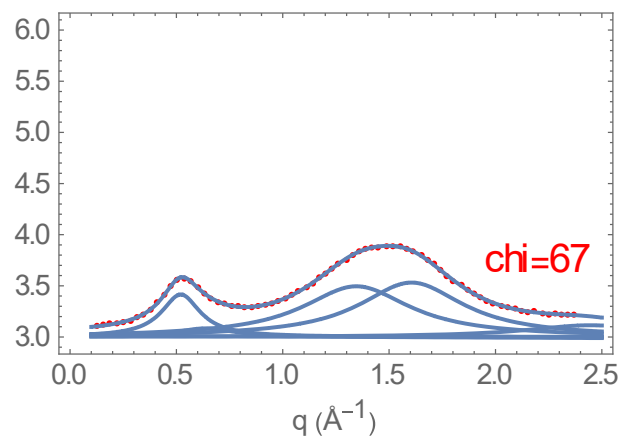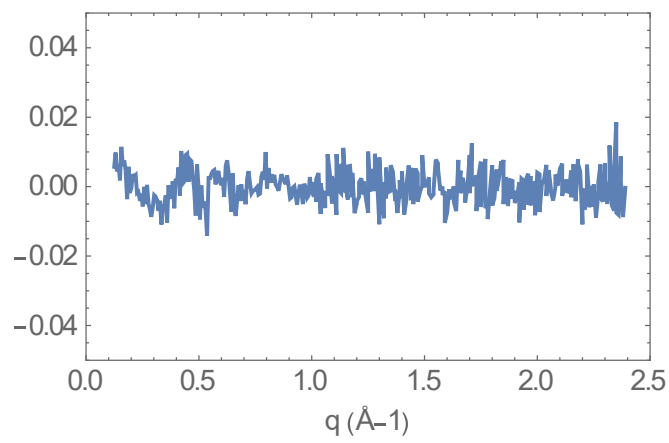



## S.6: Fitting Information for Mixtures Presented in Figure 8

### T2OH C8A

Table S.36: Local Structure Peaks for T2OH C8A

| T2OHC8A |                         |                         |
|---------|-------------------------|-------------------------|
|         | q ( $\text{\AA}^{-1}$ ) | w ( $\text{\AA}^{-1}$ ) |
| chi=0   | 0                       | 0                       |
| chi=33  | 0.314138                | 0.180562                |
| chi=50  | 0.28027                 | 0.045717                |
| chi=67  | 0.284711                | 0.044336                |
| chi=75  | 0.290773                | 0.052285                |
| chi=83  | 0.29214                 | 0.065702                |
| chi=100 | 0.41763                 | 0.185602                |

Table S.37: Fitting Parameters for T2A C6A

| a    | b           | q <sub>01</sub> | w <sub>1</sub> | A <sub>1</sub> | q <sub>02</sub> | w <sub>2</sub> | A <sub>2</sub> | q <sub>03</sub> | w <sub>3</sub> | A <sub>3</sub> | q <sub>04</sub> | w <sub>4</sub> | A <sub>4</sub> | q <sub>05</sub> | w <sub>5</sub> | A <sub>5</sub> |
|------|-------------|-----------------|----------------|----------------|-----------------|----------------|----------------|-----------------|----------------|----------------|-----------------|----------------|----------------|-----------------|----------------|----------------|
| 1    | 0.0099<br>5 | 0.138           | 0.058<br>3     | 6.11E-<br>05   | 1.17            | 0.16           | 0.0106         | 1.36            | 0.436          | 0.0788         | 1.74            | 0.308          | 0.038<br>7     | 2.44            | 0.493          | 0.0358         |
| 1.95 | 0.0099<br>4 | 0.314           | 0.079          | 0.0049<br>1    | 0.439           | 0.181          | 0.0034<br>8    | 1.26            | 0.255          | 0.0265         | 1.6             | 0.448          | 0.118          | 2.43            | 0.415          | 0.0242         |
| 2.95 | 0.0099<br>5 | 0.28            | 0.045<br>7     | 0.0018<br>5    | 0.462           | 0.285          | 0.0041<br>4    | 1.4             | 0.336          | 0.0301         | 1.73            | 0.499          | 0.016<br>2     | 2.45            | 0.493          | 0.0138         |
| 3.95 | 0.0099<br>9 | 0.285           | 0.044<br>3     | 0.0017<br>4    | 0.428           | 0.2            | 0.0021<br>6    | 0.8             | 0.19           | 0.00077<br>6   | 2.17            | 0.5            | 0.017<br>9     | 1.43            | 0.315          | 0.0307         |
| 4.95 | 0.0099<br>8 | 0.291           | 0.052<br>3     | 0.0023<br>9    | 0.467           | 0.259          | 0.0037<br>7    | 1.5             | 0.5            | 0.0499         | 2.43            | 0.487          | 0.015<br>6     | 1.41            | 0.206          | 0.0096<br>4    |
| 5.95 | 0.0099<br>9 | 0.292           | 0.065<br>7     | 0.0036<br>3    | 0.457           | 0.272          | 0.0053<br>9    | 1.41            | 0.209          | 0.0156         | 2.45            | 0.5            | 0.021<br>4     | 1.51            | 0.5            | 0.0562         |
| 6.96 | 0.0094<br>8 | 0.418           | 0.186          | 0.0079         | 0.674           | 0.466          | 0.0146         | 2.46            | 0.498          | 0.0303         | 1.41            | 0.218          | 0.035<br>1     | 1.59            | 0.479          | 0.0353         |

Figure S.35: Fitting functions (blue) and raw data (red, 1/5<sup>th</sup> of points shown) for T2OH C8A

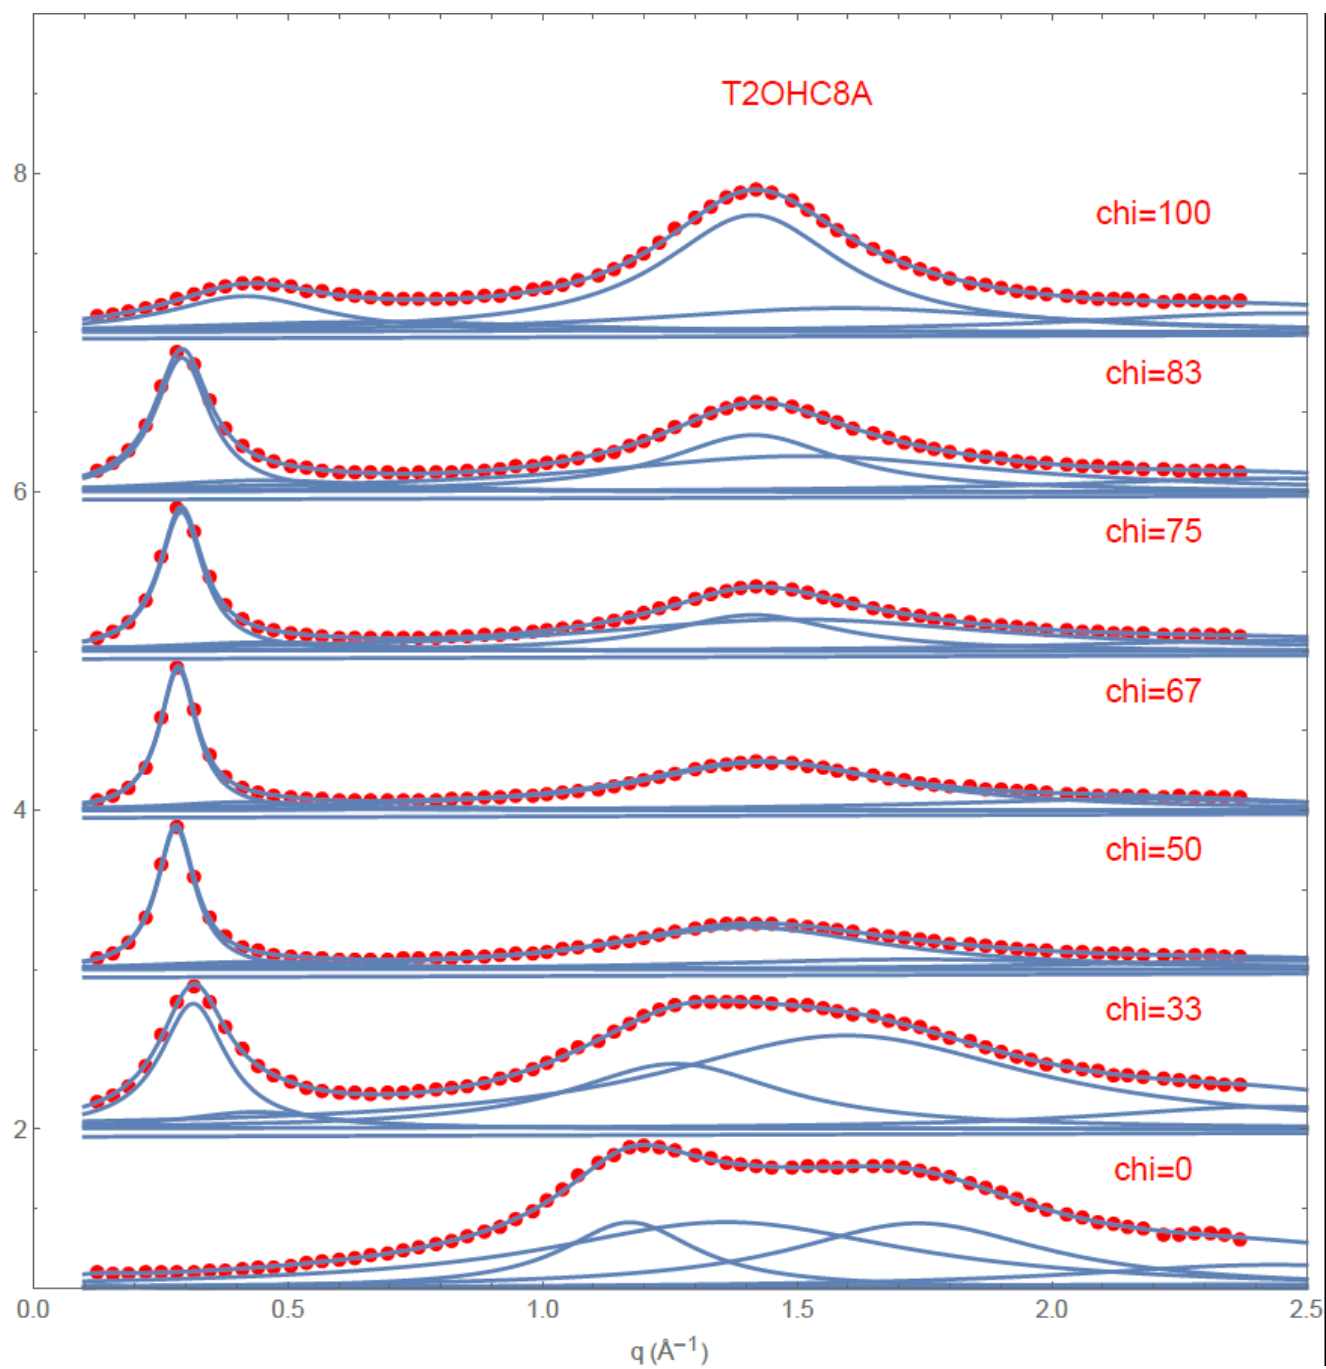

Figure S.36: Fitting functions and residuals for T2OH C8A

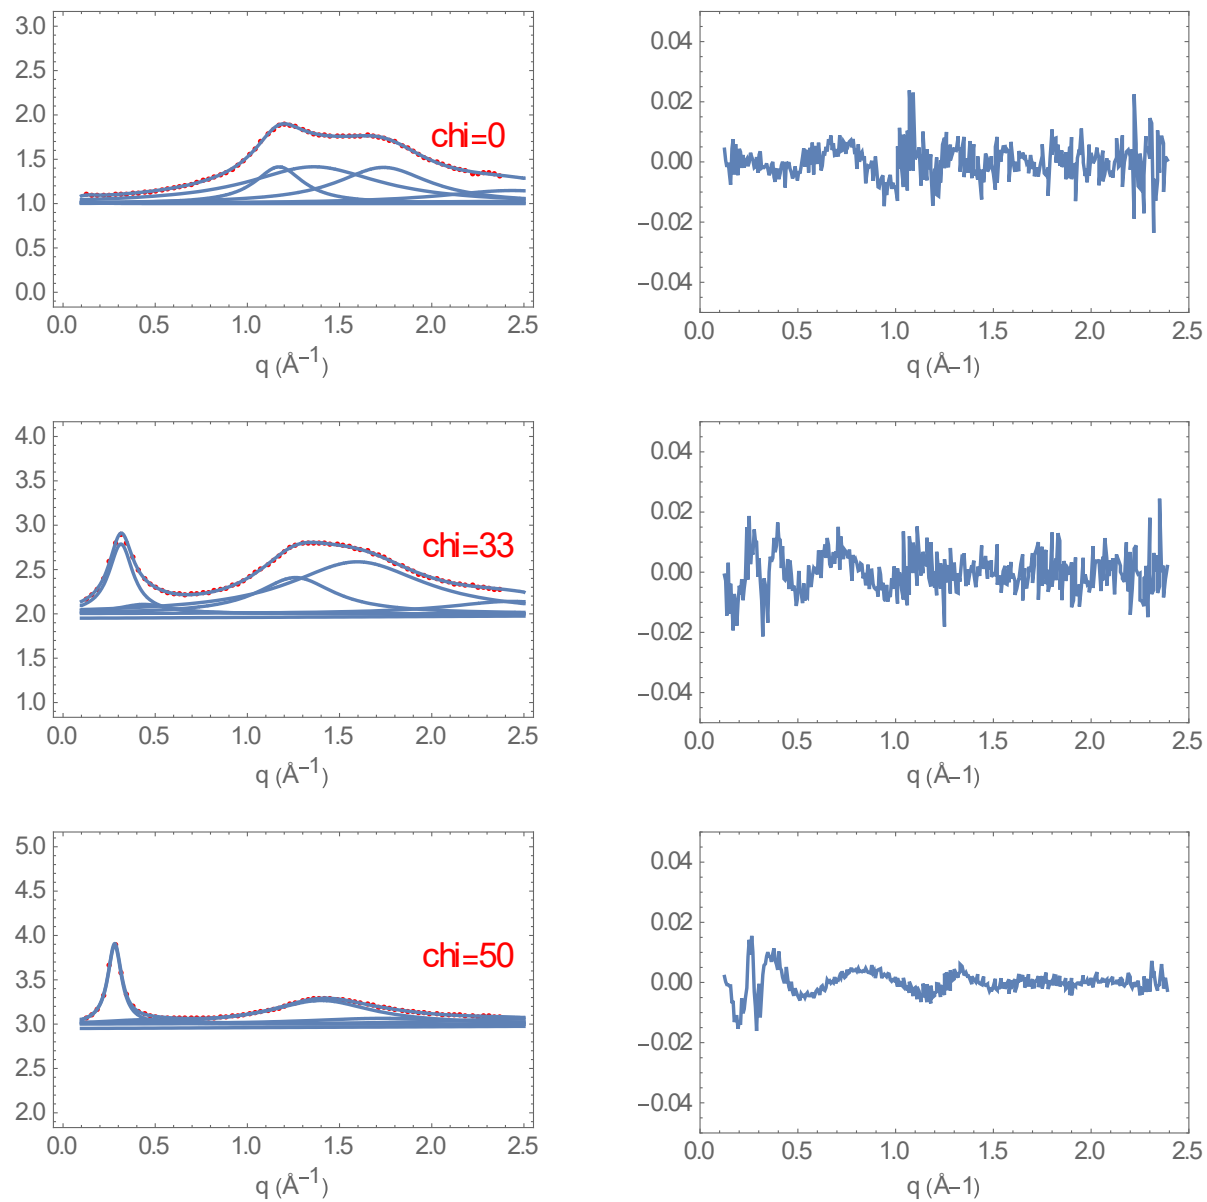

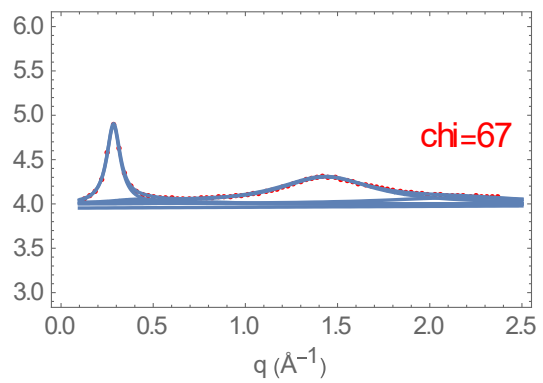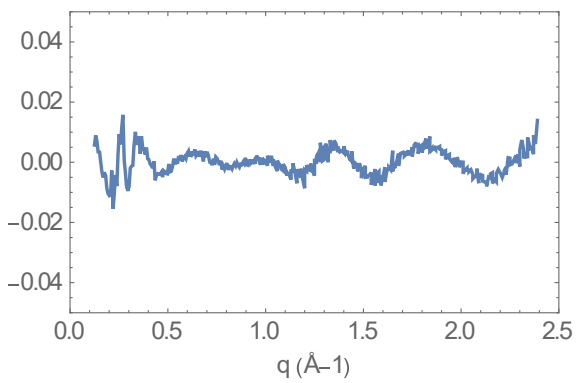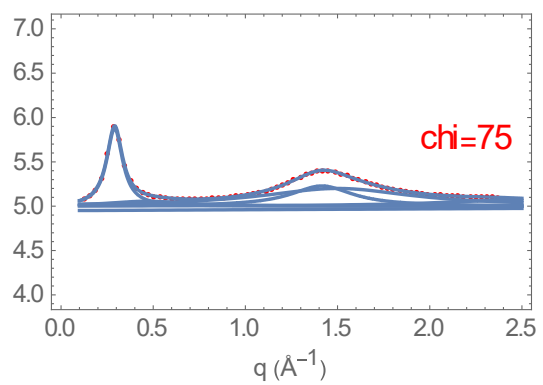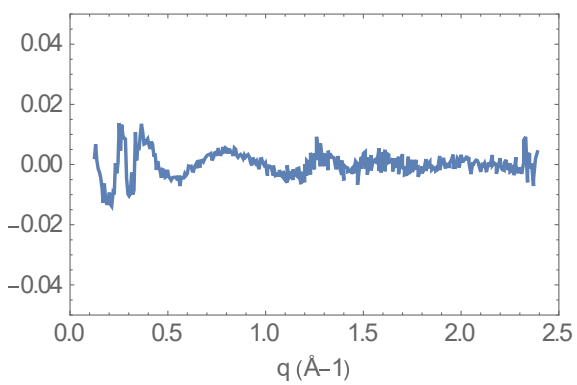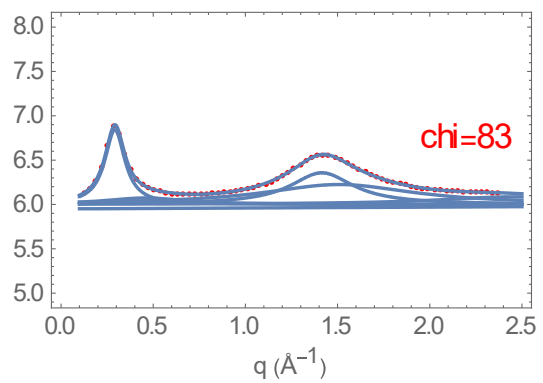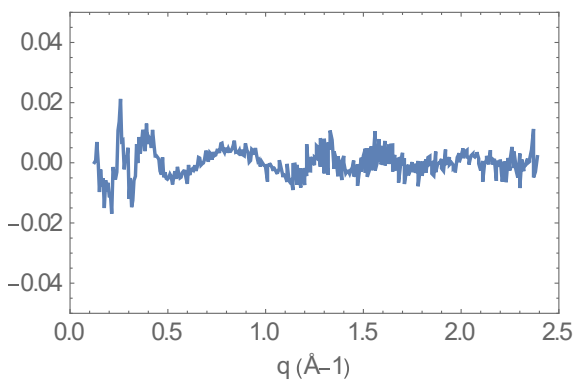

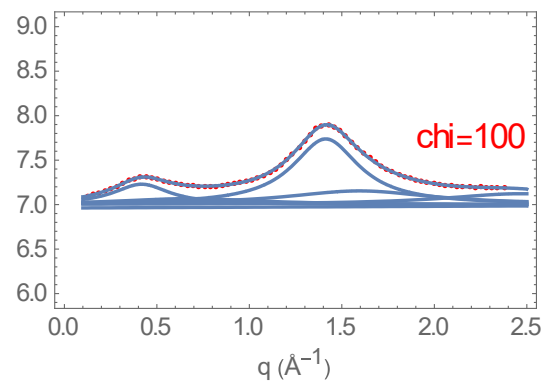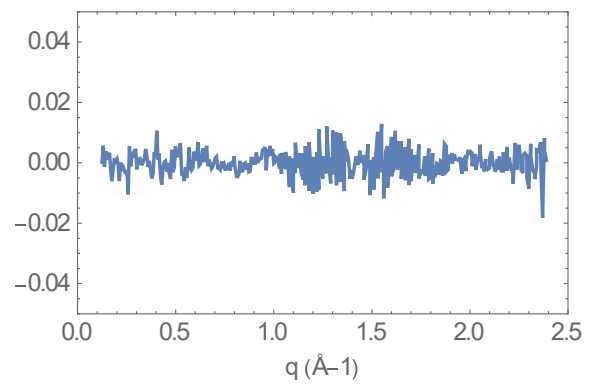

## S.7: Figures for Low-Q SAXS Analysis

Figure S.37: Log-log plots of low-q scattering for compositions showing evidence of structure in this regime

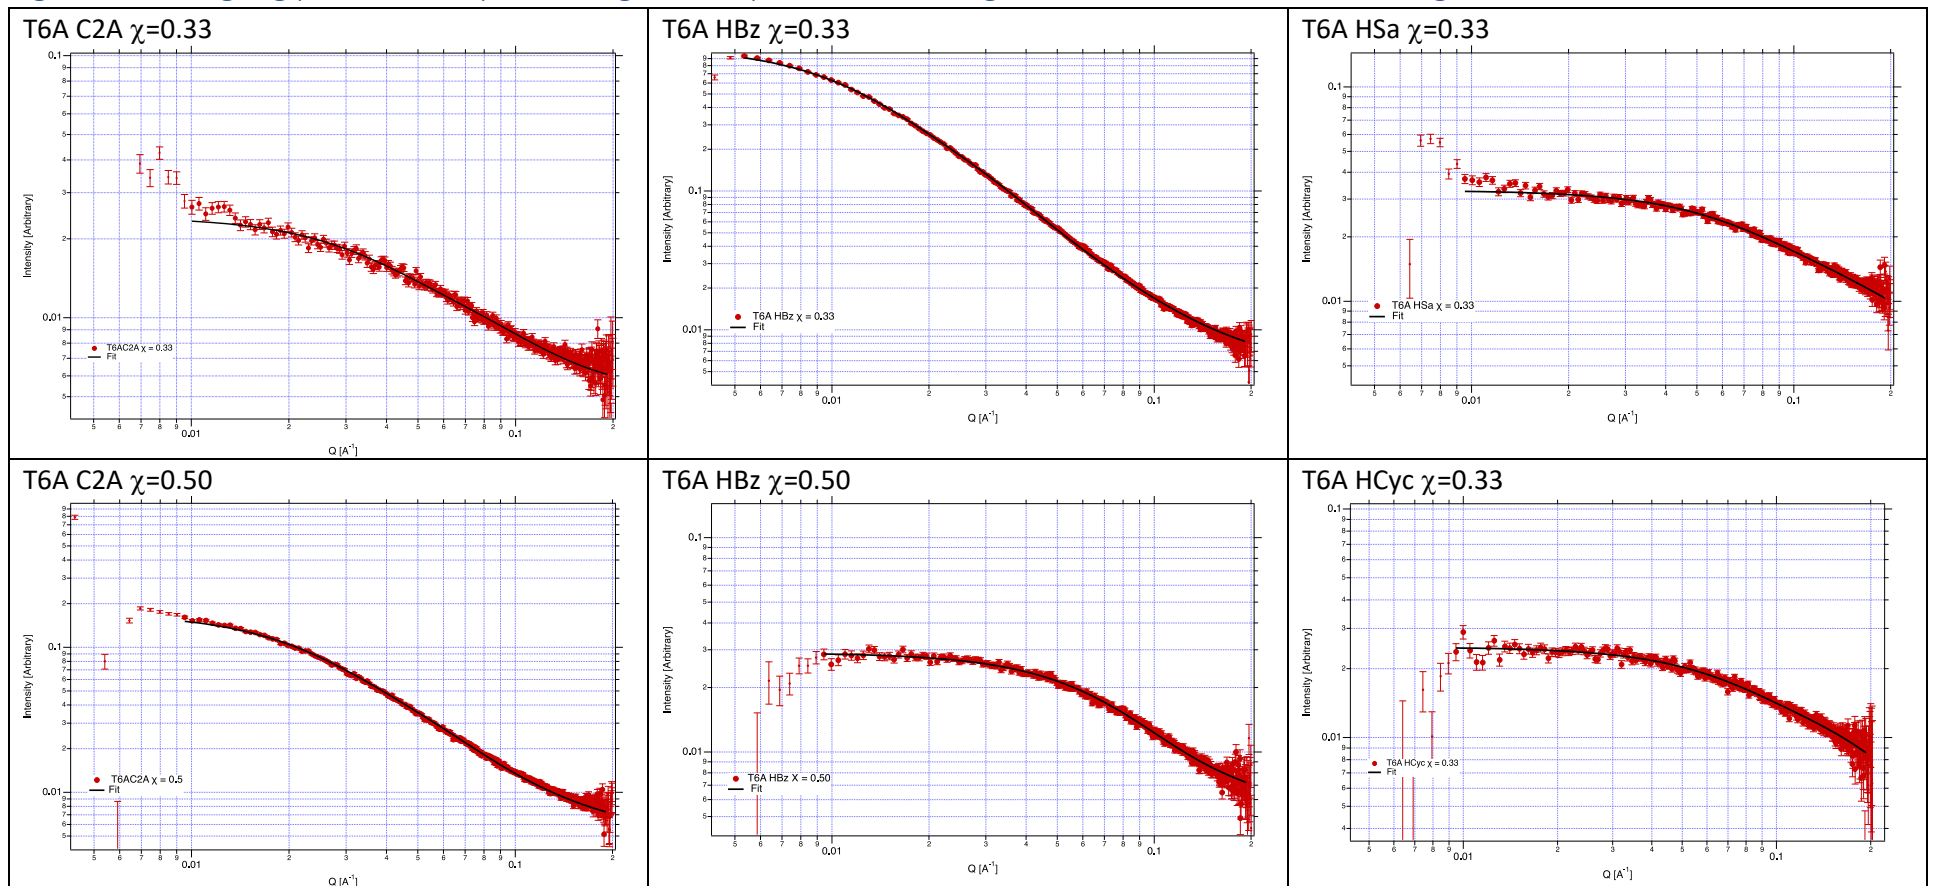

Figure S.38: Low-q scattering for T6A HCyc  $\chi=0.5$ ; structure insufficient to allow fitting to estimate lengthscale.

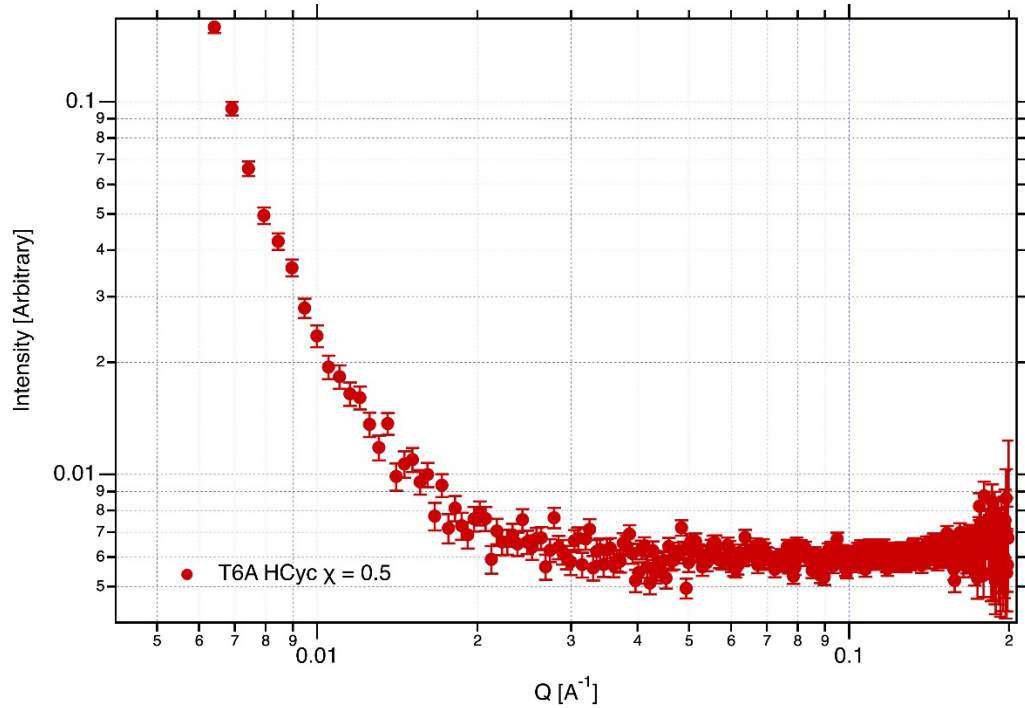

Supplement: d3cp01853a1.pdf [file d3cp01853a1.pdf]
